# Supplementary material
Source: PubMed Central journal article supplement (PMC3668835)
Supplement: JCI67963sd.pdf [file JCI67963sd.pdf]

## SUPPLEMENTAL DATA

|                                          | <b>Page</b> |
|------------------------------------------|-------------|
| Supplemental Methods                     | 2           |
| Supplemental (SI) Results and References | 6           |
| Supplemental Figures (1-5)               | 12          |
| Supplemental (SI) Tables (1-14)          | 17          |

| <b>SI Figure</b>                                                                                       |    |
|--------------------------------------------------------------------------------------------------------|----|
| SI Figure 1: Bioinformatics Flowchart                                                                  | 12 |
| SI Figure 2: Kaplan-Meier graph of survival depending on # of SNV and Ki67-index                       | 13 |
| SI Figure 3: Tumor purity as determined by histologic appearance in SI-NET                             | 14 |
| SI Figure 4: Comparison of SCNA detected with Next Generation Exome sequencing and array CGH in SI-NET | 15 |
| SI Figure 5: Cumulative chromosomal aberrations in SI-NET                                              | 16 |

| <b>Table</b>                                                                       | <b>Page</b> |
|------------------------------------------------------------------------------------|-------------|
| SI Table 1: Summary statistics                                                     | 17          |
| SI Table 2: Clinical characteristics                                               | 18          |
| SI Table 3: Tumor purity as determined by 3 different methods                      | 20          |
| SI Table 4: Sequence context of somatic SNV (data for Figure 2B)                   | 21          |
| SI Table 5: 197 Exonic SNV in 48 SI-NET                                            | 21          |
| SI Table 6: Sanger validation of SNV in independent tumor tissues using metastases | 26          |
| SI Table 7: Sanger validation of absence of mutations                              | 28          |
| SI Table 8: Deep sequencing of a panel of cancer genes                             | 35          |
| SI Table 9: Significance level of SCNA per permutation analysis                    | 36          |
| SI Table 10: Number of SCNA in 48 SBC                                              | 37          |
| SI Table 11: Percent SCNA per tumor                                                | 37          |
| SI Table 12: 1013 SNCA in 48 SBC                                                   | 39          |
| SI Table 13: Sanger validation of SNV                                              | 61          |
| SI Table 14: Candidate Actionable items                                            | 64          |

## **Supplemental Methods**

### **Immunohistochemistry and Digital Image Analysis of Ki-67 index**

Formalin fixed, paraffin-embedded tumor specimens were selected for immunohistochemical (IHC) studies. 4  $\mu$ m thick tissue sections were stained for the proliferation marker Ki-67 using the Ventana BenchMark XT automated slide-staining system. The staining protocol consisted of deparaffinization using EZ Prep, antigen retrieval for 30 min using Cell Conditioner 1 (Tris-EDTA based buffer), and incubation with a monoclonal antibody to Ki-67 (clone MIB 1, 1/20 dilution made with Dako Background Reducing Diluent (BRD)( DAKO, Glostrup, Denmark)), for 32 minutes at 37°C. Antigen-antibody reactions were visualized using UltraView detection with diaminobenzidine (DAB) as the chromogen. The slides were counterstained with Hematoxylin II for 8 minutes followed by Bluing reagent for 4 minutes. Positive controls were tonsil for Ki 67. Negative controls had the antibody replaced by BRD. Stained slides were dehydrated and coverslipped in xylene based mounting medium. The hottest staining region(s) of the tumor present were identified using the 40x tool (circle) of the Automated Cellular Imaging System (ACIS) (Dako, Carpinteria, CA) and then eight to ten hot spots within the hottest staining region(s) of the tumor present on the slide were selected. The Ki-67 index was reported as an average percent of brown-staining pixels from the total brown and blue staining pixels.

### **Illumina custom sequencing panel and array CGH**

Targeted deep sequencing was performed on 16 specimens (8 paired tumor and normal specimens) using the commercial Illumina TruSeq<sup>®</sup> cancer panel and MiSeq system. Custom Illumina alignment and variant calling software was used to identify potential pathogenic variants. The software provided variant list was then manually filtered to remove variants with listed reference SNP ID numbers, poor quality reads, and alterations with <5% allele frequency (“noise”). Remaining variants were then compared between tumor and normal samples to determine whether these variants represented germline or somatic alterations.

For the array CGH, 500 ng of genomic DNA was labeled using the Agilent Suretag Complete DNA Labeling kit. Patient samples were labeled in Cy5 and reference samples in Cy3. Samples were hybridized for 24 hours on a custom-designed Agilent 4x180k array CGH chip, washed, scanned at 3 microns per manufacturers instructions.

### **Computational processing of primary sequencing reads into aligned “bam” files**

Sequence reads were aligned to the human genome reference sequence hg19 with the Novoalign software, which is available at <http://www.novocraft.com/main/index.php>. Novoalign was chosen because it compared favorably to other aligners in a recent peer-reviewed comparison<sup>1</sup>. Novoalign was run on the raw FASTQ files using the following parameters: --mmapoff -F ILM1.8 --ILQ\_QC -h -1 -1 -H 19 --3Prime -r N -i PE 200,100 -v 250 -o FullNW -c

6. The built-in adapter trimming function of Novoalign was used to remove the following sequences: 5'-AGATCGGAAGAGCACACGTCTGAACTCCAGTCAC-3' and 5'-AGATCGGAAGAGCGTCGTGTAGGGAAAGAGTGTA-3'. Next reads were removed that mapped to multiple sites (given the mapping quality criteria defined in the above settings). In the resulting set of uniquely aligning read pairs duplicates, which can arise through the PCR amplification step during library construction were marked using the tool picard [<http://picard.sourceforge.net>]. The above processing steps were performed independently for each tumor and each germline sequence file. For the next step, each processed tumor sequence file was merged with the corresponding germline sequence file from the same patient. Indel realignment and base quality score recalibration was applied to the merged files using GATK. Marked PCR duplicates were removed (for tumor- and germline subsets separately) using Samtools<sup>2</sup>. Finally the merged files were split back into tumor- and a germline aligned bam files. These methods execute processing steps that are currently in common use in the sequencing bioinformatics field and are consistent with best practices guidelines such as GATK v3 recommendations [[http://www.broadinstitute.org/gsa/wiki/index.php/Best\\_Practice\\_Variant\\_Detection\\_with\\_the\\_GATK\\_v3](http://www.broadinstitute.org/gsa/wiki/index.php/Best_Practice_Variant_Detection_with_the_GATK_v3)].

### **Somatic single nucleotide variant (SNV) calling and prioritization**

Somatic (tumor associated) SNV were identified through joined analysis of the bam files (aligned reads) from the tumor and the corresponding germline DNA. SomaticSniper version 1.0.0<sup>3</sup> was used with the flag `-J -s 0.001`. The quality parameter “somatic score” was set to a cut off of  $\geq 30$ . In addition we added a filter (outside of SomaticSniper) requiring that the tumor was covered with  $\geq 10$  reads at the site of an SNV call and that no sequence read in the germline file showed the mutated base (“10/0” filter). The analysis was then repeated with a competing analysis software, MuTect version 1.0.27783<sup>4</sup> and only SNV confirmed with both callers were retained. The resulting “raw” SNV calls were compared with dbSNP135 (cutoff population allele frequency  $\geq 0.01$ ). Overlapping SNV were flagged and excluded from subsequent analyses further reducing the risk of false positive calls. The fraction of raw SNV calls found in dbSNP135 also served as an initial quality measure providing supporting evidence for the precision of the analysis process (see also Supplemental Results section below). Finally, genes that are highly polymorphic genes (within or across different populations); consist of repetitive sequences; or are structurally related to homologous gene families or pseudogenes such as HLA-, Muc- or olfactory receptor genes, were redacted from the SNV call list because these genes have been recognized as notorious sources of error in the context of sequencing studies. The resulting SNV were used for the analysis of the mutation pattern and rate.

SNV were annotated with PolyPhen-2<sup>5</sup> and snpEff<sup>6</sup> dichotomizing them into those located in an exon of a protein encoding gene and those located elsewhere. Exonic SNV were then divided into synonymous and non-synonymous SNV. The latter were further categorized by PolyPhen into three groups according to the predicted functional impact as “benign,” “possibly damaging,” and “probably damaging.” SNV outside of exons were searched for those affecting pre-mRNA splice site donors or acceptors. Annotation results were added as a separate column to the SNV master table. SNV were considered “high value SNV” if they were either non-synonymous mutations or if they altered splice sites. Subsequent experimental validation and biological analyses were focused these high value SNV.

The rate of mutations per megabase was estimated to be the number of mutated base positions covered by at least 10 reads as a percentage of all nucleotides captured by Illumina exon capture kit (62MB) divided by the number of mutations in the individual tumor.

### **Estimation of tumor content based on allelic fraction of SNV and SCNA**

The purity of our tumor samples was calculated essentially as described by Grasso<sup>7</sup> based on the fraction of reads harboring the alternate allele of “reliable SNV”. Reliable SNV were defined by the following: The SNV is covered by at least 10 reads in the tumor; there is no evidence of the SNV in the germline tissue; the SNV is not found dbSNP 135-common; the SNV is found with both callers, Somatic Sniper (score of 30) and MuTect. Both, exonic and non-exonic SNP were used to determine tumor purity. A tumor had to have  $\geq 20$  SNP for of tumor purity to be estimated by this method. The R-package *mixdist* was used to fit a normal distribution with three components in the set of allelic fractions for each patient. Component  $\mu_1$  represent SNV that are false positives because of alignment errors<sup>7</sup>; component  $\mu_3$  represents false positives arising from missed germline mutations in the normal tissue; component  $\mu_2$  was considered the fraction of true heterozygous SNV and, multiplied by 2 to estimate the tumor purity (Supplemental Table 2).

### **Somatic copy number alterations (SCNA)**

Reads per exon in tumor and in normal tissue were counted using processed bam files and the ratio between counts from normal tissue to tumor tissue was calculated. The ratios were normalized to the mean ratio and log2-transformed. Using the log2 normalized ratio, change-points within each chromosome were determined using the software DNACopy (R package version 1.26.0; Rfunction:segment (X, undo.splits='sdundo', undo.SD=2, REF)). Segments were classified as deletion if their mean log2 ratio was  $-0.25$  and as amplification if the mean log2 ratio was  $\geq 0.25$ .

P-values for SCNA were calculated by permutation through randomly rearranging the order of normalized log2 ratios. 50 permutations were generated for each tumor/normal pair and segmented using DNACopy. The segments were classified into amplifications and deletions as described by others<sup>8</sup>. The low cutoffs were chosen because we expected contamination of tumor with normal tissue. The number of amplified and deleted segments was determined for each permutation and compared to the counts of segments from the corresponding sample (SI Tables 9-12).

### **Pharmacogenomic knowledge mining**

For each patient genetic alterations found by exome sequencing were systematically searched for candidate therapeutic targets. We executed the search for each patient independently in order to explore the potential of exome sequencing for the clinical setting, where guidance from a genomic analysis is required one patient at a time. Ingenuity Pathway Analysis (IPA) was used as the primary knowledge mining tool. IPA represents hand-curated evidence from the peer-reviewed cancer- and pharmacology literature allowing to identify all genes altered in a patient's exome that are (i) known to contribute to the etiology or perpetuation of cancer, and (ii) are targets of drugs that are clinically available or in various stages of preclinical development. In addition the Sanger institute Cosmic Genomics of Drug Sensitivity Database

(<http://www.cancerrxgene.org>). Evidence from all sources was integrated for each patient establishing a list of candidate therapeutic targets, termed candidate “actionable” genetic alteration using a recently popularized term for molecular findings that may drive therapeutic decisions in oncology.

## **Supplemental Results**

### **Tumor tissue characterization**

All 48 cancer genomes examined were from primary SI-NET representing a cohort of unselected patients. Pathological diagnoses classified all tumors as well differentiated suggesting a high degree of homogeneity across the study specimens by traditional criteria. Exome enrichment and sequencing achieved broad and deep coverage of the targeted genomic regions, 110-fold for tumors (SI Table 1) supporting subsequent best-practice guided analysis approaches.

Tumor purity was determined by three methods: through pathological review; and calculated through the amount of SNV and SCNA in the tumor tissue, respectively. For pathological review, microscopic sections were prepared from the same frozen tumor nodules used for isolation of sequenced DNA. Tumor purity was 85% (median; 47%-96% range at the 5<sup>th</sup> and 95<sup>th</sup> percentile) in the high mutation tumors (top 31% of cohort, n=15) and 85% (32%-95%) in the low mutation tumors (bottom 69%, n=33), supporting the conclusion that the detected mutation rate was unrelated to tumor purity. Results on individual tumors are provided as Figure 1C confirming the absence of any trend. Tumor purity as determined by 3 different methods is also shown in SI Table 3. Images of histology slides from both, the high and the low mutation group are shown in SI Figure 3 depicting high tumor purity of low mutant tumors.

The mean tumor content of the samples as calculated from SNV was 68% (range between 46% and 82%) (SI Table 3) as estimated from the variant allele frequency of tumor mutations, termed somatic single nucleotide variations (SNV).

### **Accuracy of SNV calling**

The accuracy of the bioinformatic methods for somatic, i.e., tumor-associated, single nucleotide variant (SNV) calling was first established by statistical quality measures including VAF; searches of dbSNP and other databases of human genetic variation; and mutation pattern parameters such as the transition to transversion ratio (Ti/Tv). SNV calling was then validated by an independent, orthogonal method, capillary (Sanger) sequencing on non-synonymous mutations demonstrating a validation rate of 90% (SI Table 13) confirming that bioinformatic methods achieved best practices standards. We also addressed the possibility that too rigorous bioinformatics criteria might falsely exclude mutations by relaxing calling thresholds; but Sanger sequencing supported none of the additional candidates. While mutations in subclones cannot be excluded because the sensitivity of Sanger sequencing for VAF<15% is poor, the results suggest that the somatic SNV calls presented in this study are highly specific and as sensitive as the applied technology permits.

### **Tumor grade and Ki67 –labeling index**

All 48 tumors were found to be “well differentiated” on original pathology review at the time of diagnosis. Tumor material for re-review of tumor grade was available for 45/48 tumors. Re-review of the specific tumor nodules that were used for next generation sequencing

confirmed well differentiated morphology in 44 tumors. One tumor had a moderately differentiated appearance.

Tumor grade was determined by the number of mitoses per 10/HPF, and Ki67-labeling index for all tumors, for which archival paraffin blocks could be obtained (20 cases). The 44 tumors that were morphologically well differentiated all had <2 mitoses /10HPF, the moderately differentiated tumor had 10 mitoses/10HPF

The Ki67 index ranged from 0 to 8% among the 20 tumors tested with a Ki67-index of  $\leq 2\%$  in 14/20 cases and of  $>3\%$  in 6/20 cases (Figure 1). There was no association of Ki67 index with the mutation rate and no association between Ki67-index and the presence of deletion of chromosome 18 or amplification of chromosome 20 (data not shown).

### **Somatic SNV affecting a preponderance of cancer genes**

Main findings are presented in the main text. This section provides additional gene-focused discussions. *FGFR2* is a receptor tyrosine kinase that plays important roles in cell proliferation, differentiation and migration. Germline mutations in *FGFR2* are the cause for several severe musculoskeletal syndromes and both, activating and inactivating mutations have been associated with tumorigenesis<sup>11</sup>. The mutation found in our sample is located in the protein kinase domain near the ATP binding site. Mutations in *FGFR2* have been associated with high sensitivity towards the FGFR2 inhibitor PD-173074 (COSMIC drug sensitivity). The *MEN1*- tumor suppressor gene is an essential component of the MLL/SET1 histone methyltransferase complex and has roles in regulating transcription including that of SMAD3 and represses telomerase expression. Its protein product, menin, interacts with FANCD2. Mutations in the *MEN1* gene are the cause of multiple endocrine neoplasia, a genetic cancer syndrome causing pancreatic neuroendocrine neoplasms (PNEN) and is also found mutated in sporadic PNEN. The tumor suppressor and chromatin regulator *EZH2* is the catalytic subunit of the polycomb (PcG) histone lysine-methyltransferase PRC2. Interestingly, it binds *ATRX*, which is mutated in 18% of neuroendocrine carcinomas of the pancreas via its SET domain. *EZH2* is crucial for stem cell identity and differentiation and has been attributed roles in leukemia and colon cancer<sup>12</sup>. The mutation in our patient is an amino acid change in the CXC domain of the protein and predicted to be damaging to protein function. Mutations adjacent to the mutations and in the remainder of the CXC domain have been frequently found in myeloid malignancies<sup>13</sup>. *CARD11* is a cytoplasmic protein that is required for the activation of *NFkB*. Activating mutations have been found in lymphomas, colon cancer and renal cell cancer. *VHL1* is part of the E3 ubiquitin ligase complex, and recruits HIF1a in an oxygen dependent manner. Germline mutations in *VHL* are the cause of Hippiel Lindau disease, a familial cancer syndrome that results in pheochromocytoma, CNS hemangioblastoma and, interestingly, pancreatic neuroendocrine carcinoma. The specific mutation found in patient JO, has been described in three patients with renal cell carcinoma<sup>14</sup>; was found to inhibit binding of the VHL protein to HIF1a leading to its accumulation<sup>15</sup>; and inhibits binding of the *VHL* protein to HIF1a leading to its accumulation<sup>16</sup>; Since SBC are very vascular tumors these findings make this SNV in this specific patient an excellent candidate to be an important driver mutation. Inactivating mutations confer sensitivity to the proteasome inhibitor bortezomib and the microtubule inhibitor epothiloneB in pre-clinical studies (COSMIC). *NONO* (aka p54(nrb)) is a DNA and RNA binding protein involved in pre-mRNA splicing, DNA unwinding through topoisomerase I and DNA double strand (DSB) repair. Mutations in this gene were found in ovary, large intestine and in leukemias and

lymphomas. Consistent with its role in DNA DSB repair, intact *NONO* mediates resistance towards platinum drugs<sup>17</sup> and ionizing radiation<sup>18</sup>.

While not on the list of canonical cancer genes, many genes that we found are known to play roles in cancer or belong to pathways related to growth control, maintenance of genomic integrity and apoptosis. Cascades recurrently altered include PI3K-AKT-MTOR signaling, chromatin remodeling and MAPK-ERK signaling. For example, one patient had a mutation in the *mTOR* oncogene in one allele and amplification of *mTOR* in the other allele. Another tumor carried a mutation in the *BIRC5* gene. Its product, survivin is a regulator of apoptosis and mitosis, its overexpression is associated with carcinogenesis<sup>19</sup>; This specific mutation is located at position 20 and thereby in its BIR domain. The E3 ubiquitin ligase *RNF139*, is a putative tumor suppressor. Its truncation has been found in a hereditary predisposition to clear cell renal cancer<sup>20</sup>. The mutation found in SBC is located next to one of its transmembrane helical domains and is predicted to disrupt protein function by polyphen analysis.

### **Exploratory analysis of an association of somatic SNV with recurrent SCNA.**

Patients were dichotomized into a high mutation group (15 cases) and a low mutation group (33 cases).

Deletion of chromosome 18 occurred in 9 of 15 tumors in the high mutation group (60%) and 12 of 33 in the low mutation group (36%). The odds ratio (OR) was 2.6, but the result was not statistically significant (95% confidence interval was 0.6-11; Fisher's exact test  $p=0.2$ ).

Amplification of chromosome 20 occurred in 7 of 15 in the high mutation group (47%) and in 5 of 33 in the low mutation group (15%). The OR was 4.9. This result was close to or met significance criteria at the  $p<0.05$  level depending on the testing procedure applied (OR 95% CI was 1.01-25.1; Fisher's exact test  $p=0.03$ ). Other SCNA variations occurred in fewer than 5 patients and could therefore not be meaningfully compared between the high- and low mutation groups. While SCNA might occur more frequently in tumors with a higher mutation rates, especially in the case of amplification of chromosome 20. At the same time these analyses remain exploratory warranting confirmation by future studies.



## References

- Adzhubei, Ivan A, Steffen Schmidt, Leonid Peshkin, Vasily E Ramensky, Anna Gerasimova, Peer Bork, Alexey S Kondrashov, and Shamil R Sunyaev. 2010. “A Method and Server for Predicting Damaging Missense Mutations.” *Nature Methods* 7 (4) (April): 248–249. doi:10.1038/nmeth0410-248. <http://www.ncbi.nlm.nih.gov/pubmed/20354512>.
- Church, David N, and Denis C Talbot. 2012. “Survivin in Solid Tumors: Rationale for Development of Inhibitors.” *Current Oncology Reports* 14 (2) (April): 120–128. doi:10.1007/s11912-012-0215-2. <http://www.ncbi.nlm.nih.gov/pubmed/22234703>.
- Cingolani, Pablo, Adrian Platts, Le Lily Wang, Melissa Coon, Tung Nguyen, Luan Wang, Susan J Land, Xiangyi Lu, and Douglas M Ruden. 2012. “A Program for Annotating and Predicting the Effects of Single Nucleotide Polymorphisms, SnpEff: SNPs in the Genome of *Drosophila Melanogaster* Strain w ( 1118) ; Iso-2; Iso-3.” *Fly* 6 (2) (April 1): 80–92. doi:10.4161/fly.19695. <http://www.ncbi.nlm.nih.gov/pubmed/22728672>.
- Ernst, Thomas, Andrew J Chase, Joannah Score, Claire E Hidalgo-Curtis, Catherine Bryant, Amy V Jones, Katherine Waghorn, et al. 2010. “Inactivating Mutations of the Histone Methyltransferase Gene EZH2 in Myeloid Disorders.” *Nature Genetics* 42 (8) (August): 722–726. doi:10.1038/ng.621. <http://www.ncbi.nlm.nih.gov/pubmed/20601953>.
- Grasso, Catherine S., Yi-Mi Wu, Dan R. Robinson, Xuhong Cao, Saravana M. Dhanasekaran, Amjad P. Khan, Michael J. Quist, et al. 2012. “The Mutational Landscape of Lethal Castration-resistant Prostate Cancer.” *Nature*. doi:10.1038/nature11125. <http://eresources.library.mssm.edu:2072/nature/journal/vaop/ncurrent/abs/nature11125.html>.
- Igarashi, Hiroshi, Mariko Esumi, Hajime Ishida, and Kiyoki Okada. 2002. “Vascular Endothelial Growth Factor Overexpression Is Correlated with Von Hippel-Lindau Tumor Suppressor Gene Inactivation in Patients with Sporadic Renal Cell Carcinoma.” *Cancer* 95 (1) (July 1): 47–53. doi:10.1002/cncr.10635. <http://www.ncbi.nlm.nih.gov/pubmed/12115316>.
- Katoh, Yuriko, and Masaru Katoh. 2009. “FGFR2-related Pathogenesis and FGFR2-targeted Therapeutics (Review).” *International Journal of Molecular Medicine* 23 (3) (March): 307–311. <http://www.ncbi.nlm.nih.gov/pubmed/19212647>.
- Kuhnert, Anja, Uta Schmidt, Shamci Monajembashi, Claudia Franke, Bernhard Schlott, Frank Grosse, Karl Otto Greulich, Hans-Peter Saluz, and Frank Hänel. 2012. “Proteomic Identification of PSF and P54(nrb) as TopBP1-interacting Proteins.” *Journal of Cellular Biochemistry* 113 (5) (May): 1744–1753. doi:10.1002/jcb.24045. <http://www.ncbi.nlm.nih.gov/pubmed/22213094>.
- Kulke, Matthew H, Ellen Freed, Derek Y Chiang, Juliet Philips, David Zahrieh, Jonathan N Glickman, and Ramesh A Shivdasani. 2008. “High-resolution Analysis of Genetic Alterations in Small Bowel Carcinoid Tumors Reveals Areas of Recurrent Amplification and Loss.” *Genes, Chromosomes & Cancer* 47 (7) (July): 591–603. doi:10.1002/gcc.20561. <http://www.ncbi.nlm.nih.gov/pubmed/18383209>.
- Larson, David E, Christopher C Harris, Ken Chen, Daniel C Koboldt, Travis E Abbott, David J Dooling, Timothy J Ley, Elaine R Mardis, Richard K Wilson, and Li Ding. 2012. “Somatic Sniper: Identification of Somatic Point Mutations in Whole Genome

- Sequencing Data.” *Bioinformatics (Oxford, England)* 28 (3) (February 1): 311–317. doi:10.1093/bioinformatics/btr665. <http://www.ncbi.nlm.nih.gov/pubmed/22155872>.
- Li, Heng, Bob Handsaker, Alec Wysoker, Tim Fennell, Jue Ruan, Nils Homer, Gabor Marth, Goncalo Abecasis, and Richard Durbin. 2009. “The Sequence Alignment/Map Format and SAMtools.” *Bioinformatics (Oxford, England)* 25 (16) (August 15): 2078–2079. doi:10.1093/bioinformatics/btp352. <http://www.ncbi.nlm.nih.gov/pubmed/19505943>.
- Lohr, Jens G, Petar Stojanov, Michael S Lawrence, Daniel Auclair, Bjoern Chapuy, Carrie Sougnez, Peter Cruz-Gordillo, et al. 2012. “Discovery and Prioritization of Somatic Mutations in Diffuse Large B-cell Lymphoma (DLBCL) by Whole-exome Sequencing.” *Proceedings of the National Academy of Sciences of the United States of America* 109 (10) (March 6): 3879–3884. doi:10.1073/pnas.1121343109. <http://www.ncbi.nlm.nih.gov/pubmed/22343534>.
- Lonigro, Robert J, Catherine S Grasso, Dan R Robinson, Xiaojun Jing, Yi-Mi Wu, Xuhong Cao, Michael J Quist, Scott A Tomlins, Kenneth J Pienta, and Arul M Chinnaiyan. 2011. “Detection of Somatic Copy Number Alterations in Cancer Using Targeted Exome Capture Sequencing.” *Neoplasia (New York, N.Y.)* 13 (11) (November): 1019–1025. <http://www.ncbi.nlm.nih.gov/pubmed/22131877>.
- McKenna, Aaron, Matthew Hanna, Eric Banks, Andrey Sivachenko, Kristian Cibulskis, Andrew Kernytsky, Kiran Garimella, et al. 2010. “The Genome Analysis Toolkit: a MapReduce Framework for Analyzing Next-generation DNA Sequencing Data.” *Genome Research* 20 (9) (September): 1297–1303. doi:10.1101/gr.107524.110. <http://www.ncbi.nlm.nih.gov/pubmed/20644199>.
- Morin, Ryan D, Maria Mendez-Lago, Andrew J Mungall, Rodrigo Goya, Karen L Mungall, Richard D Corbett, Nathalie A Johnson, et al. 2011. “Frequent Mutation of Histone-modifying Genes in non-Hodgkin Lymphoma.” *Nature* 476 (7360) (August 18): 298–303. doi:10.1038/nature10351. <http://www.ncbi.nlm.nih.gov/pubmed/21796119>.
- Poland, Kathryn S, Mohammed Azim, Matthew Folsom, Richard Goldfarb, Rizwan Naeem, Christopher Korch, Harry A Drabkin, Robert M Gemmill, and Sharon E Plon. 2007. “A Constitutional Balanced T(3;8)(p14;q24.1) Translocation Results in Disruption of the TRC8 Gene and Predisposition to Clear Cell Renal Cell Carcinoma.” *Genes, Chromosomes & Cancer* 46 (9) (September): 805–812. doi:10.1002/gcc.20466. <http://www.ncbi.nlm.nih.gov/pubmed/17539022>.
- Schraml, Peter, Kirsten Struckmann, Florian Hatz, Stefan Sonnet, Charlotte Kully, Thomas Gasser, Guido Sauter, Michael J Mihatsch, and Holger Moch. 2002. “VHL Mutations and Their Correlation with Tumour Cell Proliferation, Microvessel Density, and Patient Prognosis in Clear Cell Renal Cell Carcinoma.” *The Journal of Pathology* 196 (2) (February): 186–193. doi:10.1002/path.1034. <http://www.ncbi.nlm.nih.gov/pubmed/11793370>.
- Tsofack, Serges P, Chantal Garand, Chris Sereduk, Donald Chow, Meraj Aziz, David Guay, Hongwei H Yin, and Michel Lebel. 2011. “NONO and RALY Proteins Are Required for YB-1 Oxaliplatin Induced Resistance in Colon Adenocarcinoma Cell Lines.” *Molecular Cancer* 10: 145. doi:10.1186/1476-4598-10-145. <http://www.ncbi.nlm.nih.gov/pubmed/22118625>.
- Wiesener, Michael S, Melchior Seyfarth, Christina Warnecke, Jan Steffen Jürgensen, Christian Rosenberger, Neil V Morgan, Eamonn R Maher, Ulrich Frei, and Kai-Uwe Eckardt. 2002. “Paraneoplastic Erythrocytosis Associated with an Inactivating Point Mutation of

the Von Hippel-Lindau Gene in a Renal Cell Carcinoma.” *Blood* 99 (10) (May 15): 3562–3565. <http://www.ncbi.nlm.nih.gov/pubmed/11986208>.

## Supplemental Figures

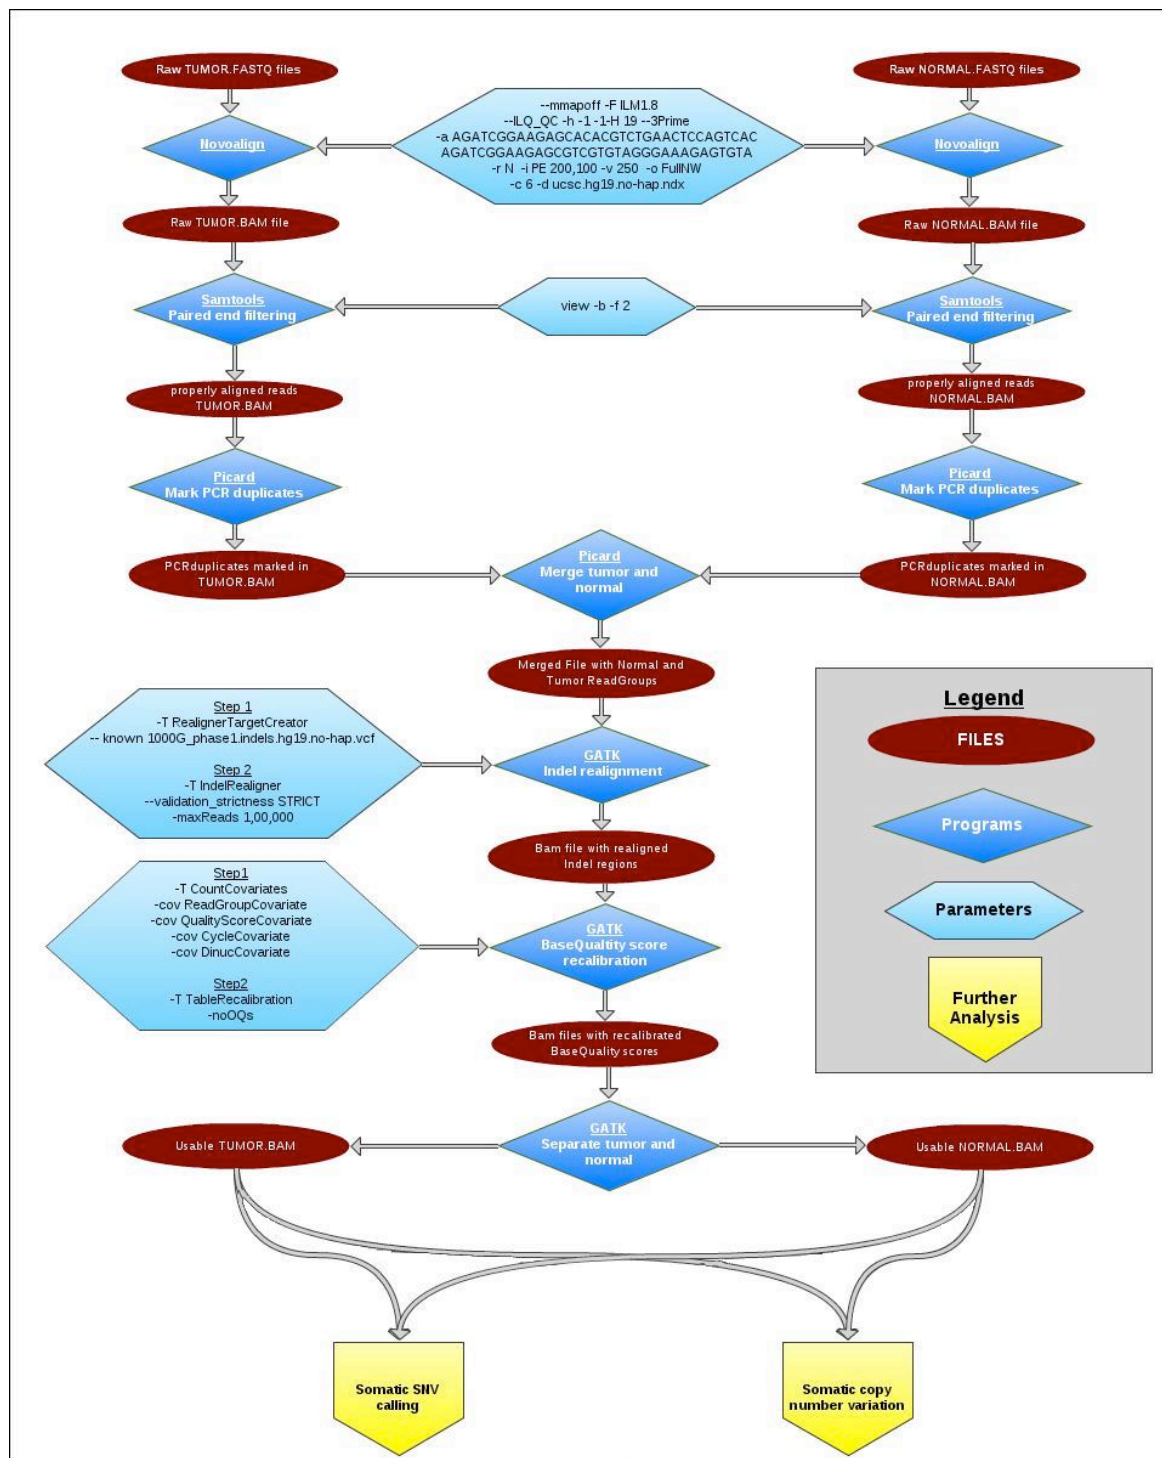

SI Figure 1.

Flow chart of bioinformatic analysis steps.

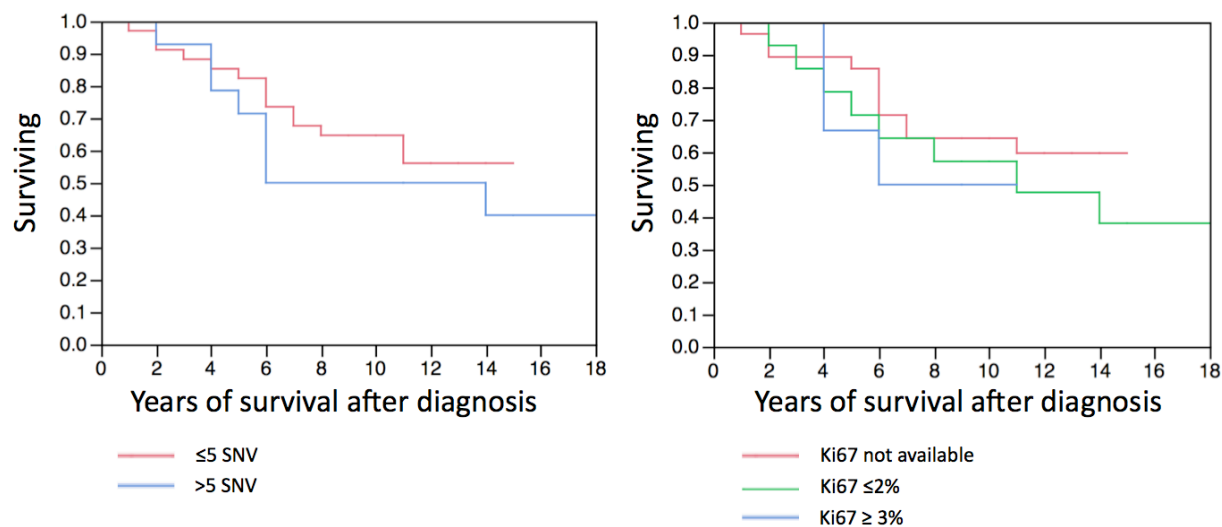

### SI Figure 2

Kaplan-Meier plots of overall survival of patients with SI-NET. A. Fourteen patients with tumors with  $\leq 5$  SNV versus 34 patients with  $\geq 6$  SNV. B. Fourteen tumors with a labeling index of  $< 3\%$ , six tumors had an index of  $> 3\%$  (range 3%-8%). Ki67-staining was available for 20 tumors.

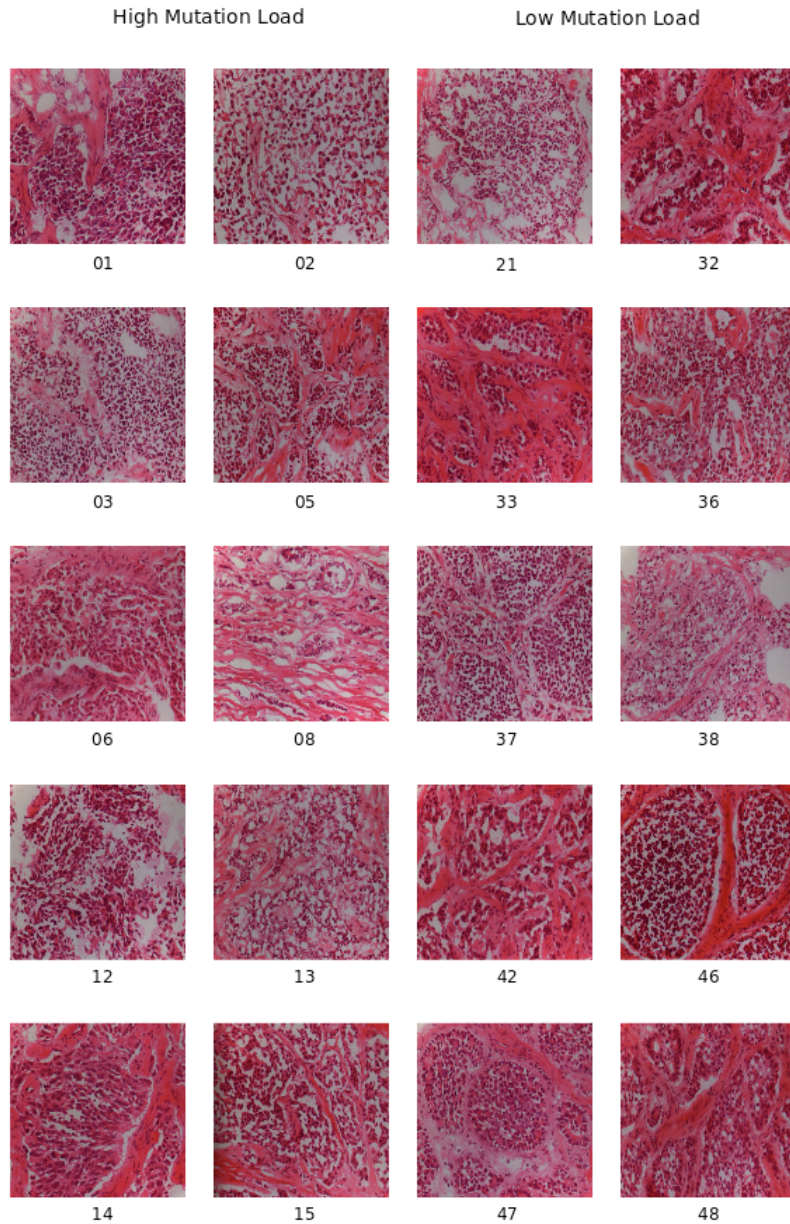

**SI Figure 3.**

Tumor purity as determined by morphologic appearance in SI-NET. Frozen sections (6 microns) from representative tumors with high and low mutation loads were stained with H&E. Left two panels: 10/15 Tumors with  $>5$  SNV. Right two panels: 10/33 Tumors with  $\leq 5$  SNV. The numbers underneath the images indicate patient ID#. Pt ID were ranked according to the number of non-synonymous SNV found in the tumor (see Figure 2C) with the lowest number assigned to the tumor with the highest number of somatic SNV.

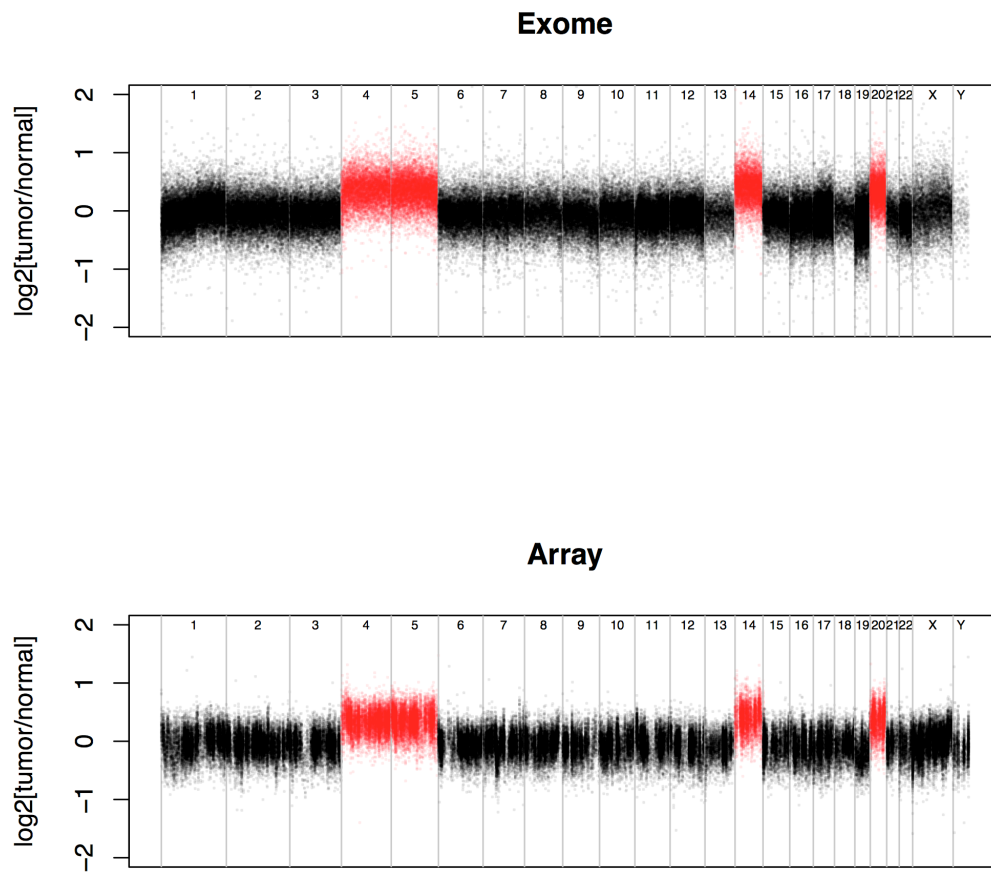

**SI Figure 4.** Comparison of SCNA detected by exome sequencing and array CGH in SI-NET. Upper panel: aCGH. Lower panel: exome sequencing. Genomic coordinates / chromosome numbers are shown on the y-axis, the  $\log_2$  ratio of tumors versus normal is shown on the x-axis. Each dot in the upper panel represents a single exon, each dots in the lower panel represent a hybridized array probe. Amplifications are shown in red.

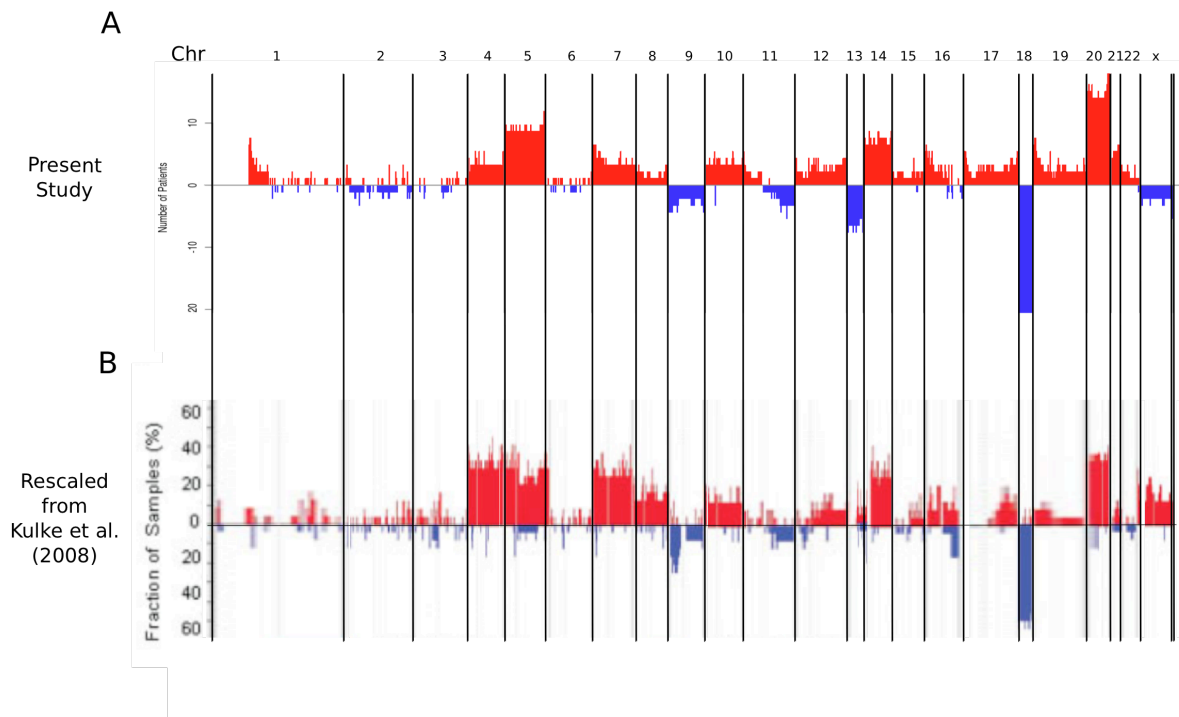

### SI Figure 5.

Cumulative chromosomal aberrations in SI-NET. A. Chromosomal aberrations as determined by next generation exome sequencing in our set of 48 SI-NET are summarized. Chromosomal gains are shown in red above the midline, chromosomal losses are shown in blue below the midline. B. Comparison with the published literature. The panel is taken from a figure by Kulke et al (Kulke et al. 2008) summarizing chromosomal aberrations in their set of 18 well differentiated SI-NET.



**Supplemental Tables**

SI Table 1. Summary Statistics

|                                  |           |
|----------------------------------|-----------|
| Targeted base pairs (Mbp)        | 62.9 Mbp  |
| Targeted base pairs covered      | 61.81 Mbp |
| % of targeted base pairs covered | 99.15%    |
| Average coverage                 | 82.82x    |
| Coverage in tumors               | 110x      |
| Coverage in normal               | 56x       |
| % covered with >30x              | 70.0%     |
| % covered with >20x              | 83.15%    |
| % covered with >10x              | 93.75%    |
| % covered with >1x               | 99.15     |

| Case | Age at diagnosis | Site of primary tumor | Stage | Sites of Metastatic Disease | Original Pathology Review           | Morphological review of new frozen section | # of Mitoses/10 HPF | Ki67 - index | Years of Survival after Diagnosis | Status   | Sandostatin LAR at Surgery | Carcinoid Syndrome | Carcinoid Heart Disease |
|------|------------------|-----------------------|-------|-----------------------------|-------------------------------------|--------------------------------------------|---------------------|--------------|-----------------------------------|----------|----------------------------|--------------------|-------------------------|
| 1    | 72               | Ileum                 | IV    | liver, lymph nodes          | Grade 1 carcinoid                   | Well differentiated                        | <2                  | 4%           | 4                                 | deceased | no                         | yes                | no                      |
| 2    | 67               | Ileum                 | IV    | liver, lymph nodes          | Carcinoid                           | Moderately differentiated                  | 10                  | N/A          | 14                                | alive    | no                         | yes                | no                      |
| 3    | 62               | Small bowel           | IV    | liver, lymph nodes, lung    | Carcinoid                           | Well differentiated                        | <2                  | 0%           | 4                                 | deceased | yes                        | yes                | no                      |
| 4    | 70               | Ileum                 | IV    | liver, lymph nodes          | Grade 1 carcinoid                   | Well differentiated                        | <2                  | N/A          | 11                                | alive    | no                         | yes                | no                      |
| 5    | 76               | Small bowel           | IV    | liver, lymph nodes          | Carcinoid                           | Well differentiated                        | <2                  | 2%           | 5                                 | deceased | no                         | yes                | no                      |
| 6    | 48               | Small bowel           | IV    | liver, lymph nodes          | Carcinoid (WDNEC)                   | Well differentiated                        | <2                  | N/A          | 6                                 | deceased | yes                        | yes                | no                      |
| 7    | 62               | Ileum                 | IV    | liver, lymph nodes          | Carcinoid                           | Well differentiated                        | <2                  | N/A          | 2                                 | deceased | no                         | yes                | yes                     |
| 8    | 61               | Ileum                 | IV    | liver, lymph nodes          | Carcinoid                           | Well differentiated                        | <2                  | 1%           | 14                                | deceased | no                         | yes                | no                      |
| 9    | 56               | Ileum                 | IV    | liver, lymph nodes          | Well differentiated carcinoid tumor | Well differentiated                        | <2                  | 6%           | 6                                 | deceased | no                         | yes                | yes                     |
| 10   | 44               | Ileum                 | IV    | liver, lymph nodes          | Carcinoid                           | Well differentiated                        | <2                  | 1%           | 15                                | alive    | no                         | no                 | no                      |
| 11   | 60               | Ileum                 | III   | lymph nodes                 | Carcinoid                           | Well differentiated                        | <2                  | N/A          | 6                                 | deceased | no                         | yes                | no                      |
| 12   | 68               | Ileum                 | III   | lymph nodes                 | Carcinoid                           | Well differentiated                        | <2                  | N/A          | 14                                | alive    | no                         | no                 | no                      |
| 13   | 45               | Ileum                 | IV    | liver, lymph nodes, bone    | Carcinoid                           | Well differentiated                        | <2                  | 5%           | 11                                | alive    | no                         | no                 | no                      |
| 14   | 53               | Small bowel           | IV    | liver, lymph nodes          | Carcinoid                           | Well differentiated                        | <2                  | 0%           | 18                                | alive    | yes                        | yes                | no                      |
| 15   | 57               | Ileum                 | IV    | liver, lymph nodes          | Low Grade carcinoid                 | Well differentiated                        | <2                  | N/A          | 6                                 | deceased | yes                        | yes                | yes                     |
| 16   | 64               | Small bowel           | III   | lymph nodes                 | Carcinoid                           | Well differentiated                        | <2                  | N/A          | 12                                | alive    | no                         | no                 | no                      |
| 17   | 54               | Ileum                 | IV    | liver, lymph nodes          | Grade 1 carcinoid                   | Well differentiated                        | <2                  | N/A          | 13                                | alive    | no                         | no                 | no                      |
| 18   | 66               | Ileum                 | II    | lymph nodes                 | Carcinoid                           | Well differentiated                        | <2                  | 1%           | 9                                 | alive    | no                         | yes                | no                      |
| 19   | 42               | Ileum                 | IV    | liver, lymph nodes          | Carcinoid                           | Well differentiated                        | <2                  | 2%           | 8                                 | deceased | no                         | unknown            | no                      |
| 20   | 51               | Ileum                 | IV    | liver, lymph nodes          | Carcinoid                           | Well differentiated                        | <2                  | N/A          | 15                                | alive    | no                         | no                 | no                      |
| 21   | 60               | Ileum                 | IV    | liver, lymph nodes          | Carcinoid                           | Well differentiated                        | <2                  | 1%           | 3                                 | deceased | no                         | yes                | no                      |
| 22   | 48               | Ileum                 | IV    | liver, lymph nodes          | Carcinoid                           | Well differentiated                        | <2                  | N/A          | 5                                 | deceased | no                         | yes                | no                      |
| 23   | 60               | Small bowel           | IV    | liver, lymph nodes          | Carcinoid                           | Well differentiated                        | <2                  | N/A          | 9                                 | alive    | no                         | yes                | no                      |
| 24   | 53               | Small bowel           | III   | lymph nodes                 | Carcinoid                           | Well differentiated                        | <2                  | N/A          | 15                                | alive    | no                         | no                 | no                      |
| 25   | 75               | Ileum                 | IV    | liver, lymph nodes          | Grade 1 NET                         | Well differentiated                        | <2                  | N/A          | 11                                | deceased | no                         | yes                | no                      |
| 26   | 63               | Ileum                 | III   | lymph nodes                 | Carcinoid (WDNEC)                   | Well differentiated                        | <2                  | N/A          | 7                                 | deceased | no                         | no                 | no                      |

|    |    |         |     |                                         |                   |                     |     |    |    |          |     |     |    |
|----|----|---------|-----|-----------------------------------------|-------------------|---------------------|-----|----|----|----------|-----|-----|----|
| 27 | 68 | Ileum   | II  | lymh nodes                              | Carcinoid         | Well differentiated | <2  | 3% | 10 | alive    | no  | no  | no |
| 28 | 62 | Jejunum | III | lymh nodes                              | Carcinoid         | Well differentiated | <2  |    | 12 | alive    | no  | no  | no |
| 29 | 73 | Jejunum | III | lymh nodes                              | Carcinoid         | Well differentiated | <2  |    | 1  | deceased | no  | no  | no |
| 30 | 40 | Ileum   | III | lymh nodes, lpeura, peritoneum, omentum | WDNEC             | Well differentiated | <2  |    | 9  | alive    | no  | no  | no |
| 31 | 66 | Ileum   | IV  | liver, lymph nodes, appendix            | Carcinoid         | Well differentiated | <2  | 1% | 2  | deceased | no  | yes | no |
| 32 | 62 | Ileum   | IV  | liver, lymph nodes, bone                | Carcinoid         | Well differentiated | <2  |    | 2  | deceased | no  | no  | no |
| 33 | 40 | Ileum   | IV  | liver, lymph nodes                      | Grade 1 carcinoid | Well differentiated | <2  | 1% | 15 | alive    | no  | no  | no |
| 34 | 54 | Ileum   | IV  | liver, lymph nodes                      | Carcinoid         | Well differentiated | <2  |    | 14 | alive    | no  | yes | no |
| 35 | 73 | Ileum   | IV  | liver, lymph nodes                      | Carcinoid         | Well differentiated | <2  |    | 12 | alive    | no  | no  | no |
| 36 | 71 | Ileum   | IV  | liver, lymph nodes                      | Carcinoid         | Well differentiated | <2  | 8% | 4  | deceased | no  | yes | no |
| 37 | 59 | Ileum   | III | lymh nodes                              | Grade 1 NET       | Well differentiated | <2  | 3% | 11 | alive    | no  | no  | no |
| 38 | 61 | Ileum   | III | lymh nodes                              | Carcinoid         | Well differentiated | <2  |    | 7  | deceased | no  | yes | no |
| 39 | 85 | Ileum   | III | lymh nodes                              | Carcinoid         | No sample available | <2  |    | 9  | alive    | no  | no  | no |
| 40 | 59 | Ileum   | III | lymh nodes                              | "carcinoid"       | Well differentiated | <2  |    | 6  | deceased | no  | yes | no |
| 41 | 48 | Ileum   | IV  | liver, lymph nodes                      | Grade 1 carcinoid | Well differentiated | <2  |    | 6  | deceased | no  | yes | no |
| 42 | 27 | Ileum   | IV  | liver, lymph nodes                      | Carcinoid         | Well differentiated | <2  | 1% | 15 | alive    | no  | yes | no |
| 43 | 63 | Ileum   | IV  | liver, lymph nodes                      | Carcinoid         | No sample available | N/A |    | 13 | alive    | no  | yes | no |
| 44 | 38 | Ileum   | IV  | liver, lymph nodes, vagina              | Grade 1 carcinoid | Well differentiated | <2  |    | 13 | alive    | no  | no  | no |
| 45 | 57 | Ileum   | III | lymh nodes                              | Grade 1 NET       | No sample available | N/A |    | 10 | alive    | no  | yes | no |
| 46 | 55 | Ileum   | III | lymh nodes                              | Carcinoid         | Well differentiated | <2  | 0% | 10 | alive    | yes | yes | no |
| 47 | 68 | Ileum   | III | lymh nodes                              | Grade 1 NET       | Well differentiated | <2  |    | 12 | alive    | no  | no  | no |
| 48 | 55 | Ileum   | IV  | liver, lymph nodes                      | Grade 1 Carcinoid | Well differentiated | <2  | 2% | 11 | deceased | no  | yes | no |

SI Table 3. Tumor purity as determined by 3 different methods: Histological review; calculation from the number of SNV; number of SCNA;

| Pt ID | % Tumor Purity      |      |     |
|-------|---------------------|------|-----|
|       | Histology           | SNV  | CNV |
| 1     | 85                  | 67.5 |     |
| 2     | 40                  | 76.5 | 71  |
| 3     | 99                  | 71.0 | 76  |
| 4     | 90                  | 70.2 |     |
| 5     | 70                  | 70.0 | 42  |
| 6     | 80                  | 70.7 | 42  |
| 7     | 50                  | 65.0 | 63  |
| 8     | 80                  | 61.8 |     |
| 9     | 95                  | 56.0 | 66  |
| 10    | 95                  | 70.0 | 58  |
| 11    | 80                  | 59.5 | 68  |
| 12    | 90                  | 63.4 | 74  |
| 13    | 90                  | 54.2 | 57  |
| 14    | 85                  | 78.9 |     |
| 15    | 60                  | 66.5 | 59  |
| 16    | 90                  | 52.6 | 74  |
| 17    | 90                  | 67.4 | 63  |
| 18    | 70                  | 67.6 | 67  |
| 19    | 50                  | 60.0 |     |
| 20    | 95                  | 67.3 |     |
| 21    | 25                  | 69.7 | 59  |
| 22    | 95                  | 59.8 | 83  |
| 23    | 85                  | 71.2 | 24  |
| 24    | 95                  | 85.6 | 82  |
| 25    | 60                  | 78.8 | 28  |
| 26    | 90                  |      | 32  |
| 27    | 95                  | 79.4 | 50  |
| 28    | 85                  |      |     |
| 29    | 90                  |      | 53  |
| 30    | 80                  | 67.8 |     |
| 31    | 95                  | 65.3 |     |
| 32    | 80                  | 49.8 | 30  |
| 33    | 40                  | 80.2 |     |
| 34    | 99                  | 74.0 | 73  |
| 35    | 70                  | 46.7 | 44  |
| 36    | 85                  |      |     |
| 37    | 90                  |      | 30  |
| 38    | 50                  |      |     |
| 39    | No sample available |      | 27  |
| 40    | 70                  |      |     |
| 41    | 15                  |      |     |
| 42    | 95                  |      | 47  |
| 43    | No sample available | 82.0 | 45  |
| 44    | 60                  | 75.0 |     |
| 45    | No sample available |      |     |
| 46    | 80                  |      | 22  |

|    |    |  |  |
|----|----|--|--|
| 47 | 90 |  |  |
| 48 | 95 |  |  |

SI Table 4: Sequence context of somatic SNC (data for Figure 2B)

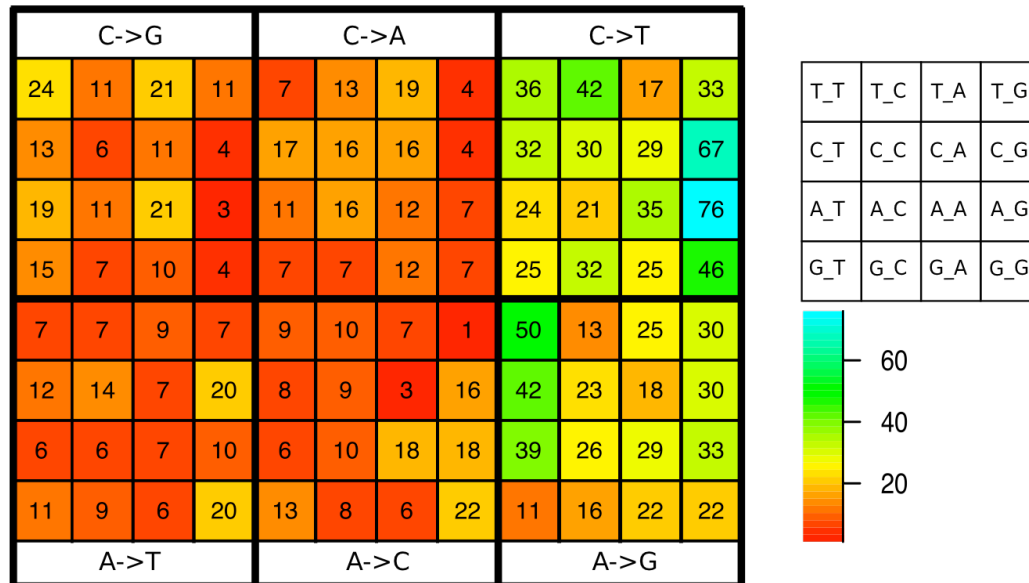

SI Table 5: 197 Exonic SNV in 48 SBC

| Gene     | Pt ID | Chr  | bp position | Curr bp | Mut bp | type     | prediction        | aa1 | aa2 | aa pos |
|----------|-------|------|-------------|---------|--------|----------|-------------------|-----|-----|--------|
| ABCA13   | 9     | chr7 | 48467390    | A       | G      | missense | benign            | N   | D   | 4163   |
| ABCC12   | 2     | chr1 | 48167686    | G       | A      | missense | benign            | S   | F   | 347    |
| ABCC12   | 6     | chr1 | 48175249    | C       | T      | nonsense | N/A               | W   | *   | 97     |
| ABHD14A  | 6     | chr3 | 52012038    | T       | A      | missense | probably damaging | L   | H   | 74     |
| ADAM11   | 8     | chr1 | 42850385    | G       | C      | missense | possibly damaging | E   | Q   | 253    |
| ADAM32   | 11    | chr8 | 39091459    | G       | A      | missense | benign            | R   | Q   | 559    |
| ADAMTS6  | 28    | chr5 | 64748016    | G       | C      | missense | benign            | L   | V   | 291    |
| ADCY5    | 3     | chr3 | 123166459   | C       | T      | missense | benign            | V   | I   | 312    |
| AGRN     | 6     | chr1 | 989829      | G       | T      | nonsense | N/A               | E   | *   | 1960   |
| AICDA    | 8     | chr1 | 8758008     | C       | T      | missense | probably damaging | R   | H   | 77     |
| AKAP6    | 12    | chr1 | 33292849    | G       | T      | missense | probably damaging | D   | Y   | 1944   |
| ANKRD26  | 8     | chr1 | 27389110    | T       | G      | missense | probably damaging | K   | T   | 49     |
| ANKRD30B | 20    | chr1 | 14796361    | T       | A      | missense | benign            | V   | D   | 625    |
| APOB     | 7     | chr2 | 21237379    | G       | T      | missense | benign            | F   | L   | 1261   |
| AQP7     | 25    | chr9 | 33386465    | A       | G      | missense | possibly damaging | Y   | H   | 115    |

| Gene      | Pt ID | Chr  | bp position | Curr bp | Mut bp | type     | prediction        | aa1 | aa2 | aa pos |
|-----------|-------|------|-------------|---------|--------|----------|-------------------|-----|-----|--------|
| AQP7      | 25    | chr9 | 33386510    | C       | T      | missense | benign            | A   | T   | 100    |
| ARHGAP25  | 9     | chr2 | 69046401    | G       | T      | missense | probably damaging | D   | Y   | 383    |
| ARHGEF2   | 2     | chr1 | 155921756   | T       | C      | missense | probably damaging | N   | S   | 709    |
| ASCC3     | 5     | chr6 | 100988080   | C       | T      | missense | probably damaging | D   | N   | 1912   |
| ATP4A     | 12    | chr1 | 36050924    | C       | T      | missense | benign            | R   | H   | 280    |
| ATP6V1D   | 2     | chr1 | 67819681    | A       | C      | missense | probably damaging | L   | V   | 40     |
| BAHCC1    | 8     | chr1 | 79428632    | T       | G      | missense | possibly damaging | S   | A   | 2315   |
| BAT5      | 15    | chr6 | 31658319    | C       | T      | missense | benign            | E   | K   | 302    |
| BIRC5     | 3     | chr1 | 76210455    | T       | A      | missense | benign            | S   | T   | 20     |
| BRD9      | 3     | chr5 | 891760      | G       | A      | nonsense | N/A               | R   | *   | 88     |
| C10orf90  | 27    | chr1 | 128192910   | T       | A      | nonsense | N/A               | R   | *   | 287    |
| C14orf177 | 16    | chr1 | 99183604    | A       | G      | missense | benign            | Q   | R   | 124    |
| C16orf46  | 1     | chr1 | 81094863    | G       | T      | missense | probably damaging | P   | H   | 364    |
| C1orf174  | 2     | chr1 | 3807255     | C       | G      | missense | probably damaging | G   | R   | 166    |
| C1R       | 1     | chr1 | 7188237     | G       | C      | missense | benign            | L   | V   | 573    |
| C3orf45   | 21    | chr3 | 50324632    | G       | T      | nonsense | N/A               | *   | L   | N/A    |
| CAPN7     | 24    | chr3 | 15262338    | C       | G      | nonsense | N/A               | S   | *   | 163    |
| CARD11    | 4     | chr7 | 2956964     | C       | T      | missense | probably damaging | R   | H   | 888    |
| CCDC117   | 1     | chr2 | 29169745    | G       | A      | missense | possibly damaging | R   | Q   | 73     |
| CCDC135   | 3     | chr1 | 57756676    | C       | T      | missense | probably damaging | A   | V   | 444    |
| CCDC33    | 16    | chr1 | 74564089    | C       | T      | missense | probably damaging | P   | S   | 198    |
| CD1C      | 7     | chr1 | 158260950   | G       | A      | missense | benign            | V   | I   | 30     |
| CDC27     | 5     | chr1 | 45234303    | G       | C      | missense | possibly damaging | A   | G   | 273    |
| CDK5RAP1  | 1     | chr2 | 31967304    | C       | A      | missense | probably damaging | R   | L   | 357    |
| CDK5RAP3  | 4     | chr1 | 46050904    | G       | T      | missense | probably damaging | R   | S   | 24     |
| CHGA      | 2     | chr1 | 93398882    | G       | A      | missense | possibly damaging | E   | K   | 326    |
| CLCN1     | 18    | chr7 | 143039135   | G       | T      | missense | probably damaging | A   | S   | 566    |
| CLEC18A   | 3     | chr1 | 69988463    | C       | G      | missense | benign            | T   | S   | 148    |
| CNKS3     | 11    | chr6 | 154744078   | C       | G      | missense | probably damaging | E   | Q   | 257    |
| CNOT1     | 3     | chr1 | 58585058    | G       | A      | missense | probably damaging | S   | L   | 1107   |
| COL4A4    | 1     | chr2 | 228004909   | C       | G      | missense | benign            | V   | L   | 54     |
| CORIN     | 3     | chr4 | 47647197    | C       | T      | missense | possibly damaging | D   | N   | 620    |
| COX7B     | 2     | chrX | 77155088    | A       | G      | missense | benign            | Q   | R   | 13     |
| CRNKL1    | 14    | chr2 | 20019010    | G       | A      | missense | probably damaging | R   | W   | 705    |
| CSF1R     | 7     | chr5 | 149441310   | A       | T      | missense | probably damaging | F   | I   | 577    |
| CSGALNAC  | 7     | chr8 | 19362801    | T       | C      | missense | benign            | E   | G   | 182    |
| CUX2      | 14    | chr1 | 111746243   | C       | T      | missense | benign            | P   | S   | 391    |
| DBR1      | 12    | chr3 | 137890486   | T       | C      | missense | probably damaging | D   | G   | 131    |
| DCTN1     | 5     | chr2 | 74597408    | T       | A      | nonsense | N/A               | K   | *   | 398    |
| DDX60     | 9     | chr4 | 169188789   | G       | T      | missense | benign            | H   | N   | 995    |
| DHRS7B    | 37    | chr1 | 21094386    | C       | G      | missense | possibly damaging | L   | V   | 300    |
| DHX15     | 18    | chr4 | 24543533    | C       | T      | missense | probably damaging | R   | K   | 483    |
| DNAH7     | 2     | chr2 | 196723400   | T       | C      | missense | benign            | E   | G   | 2622   |

| Gene      | Pt ID | Chr  | bp position | Curr bp | Mut bp | type     | prediction        | aa1 | aa2 | aa pos |
|-----------|-------|------|-------------|---------|--------|----------|-------------------|-----|-----|--------|
| DNEL2     | 6     | chr1 | 76456029    | C       | T      | missense | probably damaging | V   | I   | 3159   |
| DPH2      | 3     | chr1 | 44436775    | T       | G      | missense | benign            | L   | R   | 133    |
| EME2      | 7     | chr1 | 1825947     | C       | T      | missense | probably damaging | A   | V   | 324    |
| EPB41     | 26    | chr1 | 29379748    | A       | G      | missense | benign            | E   | G   | 555    |
| EZH2      | 17    | chr7 | 148512119   | T       | G      | missense | probably damaging | N   | T   | 520    |
| FABP3     | 5     | chr1 | 31840281    | T       | A      | missense | benign            | T   | S   | 103    |
| FAM101A   | 22    | chr1 | 124798854   | C       | T      | missense | probably damaging | T   | M   | 145    |
| FAM153A   | 4     | chr5 | 177163580   | A       | G      | missense | benign            | F   | L   | 145    |
| FAM153C   | 26    | chr5 | 177468759   | C       | T      | missense | possibly damaging | H   | Y   | 67     |
| FAM179A   | 20    | chr2 | 29247164    | G       | A      | missense | benign            | G   | S   | 593    |
| FAM19A2   | 2     | chr1 | 62148677    | G       | A      | nonsense | N/A               | R   | *   | 79     |
| FAM47A    | 1     | chrX | 34150370    | C       | T      | nonsense | N/A               | W   | *   | 9      |
| FAM5C     | 4     | chr1 | 190250791   | C       | T      | missense | benign            | R   | H   | 109    |
| FAM83C    | 1     | chr2 | 33876327    | G       | A      | missense | probably damaging | T   | M   | 248    |
| FGD1      | 4     | chrX | 54494335    | G       | A      | missense | probably damaging | R   | W   | 408    |
| FGFR2     | 15    | chr1 | 123260379   | G       | C      | missense | benign            | P   | A   | 507    |
| FLG       | 2     | chr1 | 152280397   | G       | T      | missense | benign            | A   | E   | 2322   |
| FNDC1     | 4     | chr6 | 159654566   | C       | T      | missense | benign            | P   | S   | 1008   |
| FOXD4L3   | 33    | chr9 | 70918189    | A       | T      | nonsense | N/A               | K   | *   | 108    |
| FRG1      | 10    | chr4 | 190883051   | G       | A      | missense | benign            | R   | Q   | 235    |
| FRMPD4    | 1     | chrX | 12725747    | G       | T      | nonsense | N/A               | E   | *   | 483    |
| GABRA4    | 2     | chr4 | 46930652    | C       | T      | missense | benign            | E   | K   | 419    |
| GALNT14   | 10    | chr2 | 31133822    | A       | G      | missense | benign            | V   | A   | 535    |
| GAMT      | 2     | chr1 | 1398679     | G       | A      | missense | probably damaging | A   | V   | 269    |
| GNAT2     | 10    | chr1 | 110146671   | A       | G      | missense | probably damaging | F   | S   | 259    |
| GOLGA3    | 27    | chr1 | 133381482   | G       | C      | missense | possibly damaging | L   | V   | 473    |
| GPAT2     | 13    | chr2 | 96690175    | C       | T      | missense | probably damaging | A   | T   | 557    |
| GPR152    | 1     | chr1 | 67218883    | G       | C      | missense | benign            | T   | S   | 438    |
| GPR68     | 1     | chr1 | 91701046    | C       | T      | missense | possibly damaging | V   | M   | 117    |
| GTPBP4    | 9     | chr1 | 1055494     | G       | T      | missense | possibly damaging | G   | V   | 406    |
| HAGHL     | 6     | chr1 | 779430      | C       | A      | missense | possibly damaging | L   | I   | 275    |
| HAUS4     | 3     | chr1 | 23417166    | C       | T      | missense | benign            | V   | M   | 207    |
| HINT3     | 7     | chr6 | 126278173   | A       | C      | missense | benign            | E   | A   | 17     |
| HIST1H2AC | 13    | chr6 | 26124714    | A       | T      | missense | possibly damaging | Q   | L   | 85     |
| HOOK3     | 1     | chr8 | 42863058    | G       | C      | missense | benign            | R   | T   | 575    |
| HSPH1     | 9     | chr1 | 31713024    | G       | A      | missense | probably damaging | P   | L   | 701    |
| HTR1A     | 2     | chr5 | 63257357    | C       | T      | missense | probably damaging | E   | K   | 64     |
| ICMT      | 36    | chr1 | 6285164     | T       | C      | missense | probably damaging | I   | M   | 277    |
| IGLL3     | 3     | chr2 | 25714042    | C       | T      | missense | N/A               | P   | S   | N/A    |
| ITGA1     | 1     | chr5 | 52229777    | T       | A      | missense | benign            | V   | D   | 972    |
| KIAA0232  | 7     | chr4 | 6826352     | A       | G      | missense | possibly damaging | T   | A   | 58     |
| KIAA1598  | 6     | chr1 | 118700003   | C       | A      | nonsense | N/A               | E   | *   | 278    |
| KIF3C     | 4     | chr2 | 26203280    | C       | G      | missense | probably damaging | E   | Q   | 503    |

| Gene     | Pt ID | Chr  | bp position | Curr bp | Mut bp | type     | prediction        | aa1 | aa2 | aa pos |
|----------|-------|------|-------------|---------|--------|----------|-------------------|-----|-----|--------|
| KLHL34   | 1     | chrX | 21675068    | G       | C      | missense | benign            | T   | S   | 280    |
| KRT24    | 7     | chr1 | 38859884    | G       | A      | missense | benign            | S   | F   | 21     |
| LRPPRC   | 5     | chr2 | 44206974    | G       | T      | missense | benign            | Q   | K   | 154    |
| LRRC37A2 | 19    | chr1 | 44626866    | T       | C      | missense | benign            | L   | P   | 1454   |
| MACF1    | 6     | chr1 | 39908507    | C       | T      | missense | benign            | A   | V   | 4852   |
| MAGEC1   | 16    | chrX | 140994490   | G       | T      | missense | benign            | A   | S   | 434    |
| MAP4K1   | 6     | chr1 | 39083940    | C       | T      | missense | probably damaging | R   | H   | 793    |
| MARVELD2 | 28    | chr5 | 68715500    | C       | G      | missense | benign            | D   | E   | 96     |
| MCC      | 17    | chr5 | 112364712   | G       | A      | missense | probably damaging | A   | V   | 933    |
| MEGF11   | 7     | Chr1 | 66209204    | T       | C      | missense | Benign            | H   | R   | 726    |
| MEN1     | 11    | chr1 | 64577233    | G       | C      | missense | possibly damaging | L   | V   | 117    |
| MFI2     | 35    | chr3 | 196742306   | C       | T      | missense | benign            | R   | Q   | 388    |
| MLF1     | 4     | chr3 | 158320655   | C       | T      | nonsense | N/A               | R   | *   | 210    |
| MLL4     | 2     | chr1 | 36211993    | T       | G      | missense | benign            | S   | A   | 582    |
| MRPL37   | 34    | chr1 | 54670712    | T       | G      | missense | probably damaging | L   | R   | 123    |
| MTOR     | 13    | chr1 | 11316221    | C       | T      | missense | benign            | S   | N   | 178    |
| MYH6     | 11    | chr1 | 23851253    | T       | C      | missense | probably damaging | E   | G   | 1939   |
| MYOM3    | 9     | chr1 | 24397614    | C       | A      | missense | probably damaging | S   | I   | 1048   |
| MYSM1    | 3     | chr1 | 59141181    | C       | A      | missense | probably damaging | A   | S   | 488    |
| NBEAL2   | 1     | chr3 | 47037310    | G       | A      | missense | probably damaging | E   | K   | 669    |
| NBPF15   | 40    | chr1 | 148579636   | T       | C      | missense | benign            | F   | S   | 69     |
| NBPF16   | 31    | chr1 | 148756664   | G       | T      | nonsense | N/A               | G   | *   | 665    |
| NCKAP5L  | 9     | chr1 | 50190700    | C       | T      | missense | probably damaging | D   | N   | 311    |
| NDEL1    | 1     | chr1 | 8349109     | T       | A      | missense | benign            | V   | E   | 56     |
| NDST4    | 10    | chr4 | 115997466   | A       | T      | missense | benign            | S   | T   | 243    |
| NDUFV1   | 5     | chr1 | 67378987    | G       | A      | missense | benign            | V   | M   | 343    |
| NEK1     | 38    | chr4 | 170483347   | C       | T      | missense | benign            | A   | T   | 341    |
| NFASC    | 5     | chr1 | 204946827   | C       | G      | missense | benign            | T   | S   | 617    |
| NHS      | 1     | chrX | 17744016    | C       | A      | missense | probably damaging | S   | Y   | 576    |
| NLRP3    | 18    | chr1 | 247588841   | G       | A      | missense | benign            | R   | Q   | 699    |
| NODAL    | 36    | chr1 | 72201249    | G       | C      | missense | probably damaging | R   | G   | 59     |
| NONO     | 39    | chrX | 70516832    | G       | A      | missense | benign            | R   | H   | 293    |
| NPIPL2   | 15    | chr1 | 74425703    | G       | A      | missense | probably damaging | E   | K   | 292    |
| NUP133   | 5     | chr1 | 229584921   | A       | C      | missense | benign            | I   | R   | 1066   |
| NVL      | 9     | chr1 | 224455798   | G       | T      | missense | probably damaging | T   | K   | 707    |
| OVCH2    | 17    | chr1 | 7712504     | T       | G      | missense | benign            | K   | N   | 545    |
| PAN2     | 1     | chr1 | 56713109    | G       | A      | missense | probably damaging | R   | W   | 1089   |
| PAN3     | 22    | chr1 | 28794512    | C       | G      | missense | benign            | P   | A   | 279    |
| PARP4    | 8     | chr1 | 25030574    | A       | C      | missense | possibly damaging | S   | A   | 823    |
| PCDH7    | 2     | chr4 | 30725445    | G       | T      | missense | probably damaging | V   | F   | 801    |
| PCDHB12  | 12    | chr5 | 140588938   | G       | T      | missense | benign            | L   | F   | 153    |
| PDIA5    | 5     | chr3 | 122864976   | A       | C      | missense | probably damaging | T   | P   | 338    |
| PDS5B    | 2     | chr1 | 33332715    | C       | G      | nonsense | N/A               | S   | *   | 1078   |



| Gene    | Pt ID | Chr  | bp position | Curr bp | Mut bp | type     | prediction        | aa1 | aa2 | aa pos |
|---------|-------|------|-------------|---------|--------|----------|-------------------|-----|-----|--------|
| PDYN    | 5     | chr2 | 1961099     | C       | T      | missense | probably damaging | R   | Q   | 212    |
| PHF3    | 10    | chr6 | 64413510    | A       | G      | missense | probably damaging | T   | A   | 1106   |
| PIK3C2A | 1     | chr1 | 17167273    | G       | C      | missense | possibly damaging | P   | R   | 549    |
| PKHD1L1 | 2     | chr8 | 110509401   | A       | G      | missense | possibly damaging | Y   | C   | 3500   |
| PLXNA3  | 1     | chrX | 153696254   | C       | T      | missense | probably damaging | R   | C   | 1244   |
| PLXNB1  | 3     | chr3 | 48463137    | A       | T      | nonsense | N/A               | C   | *   | 533    |
| PLXND1  | 14    | chr3 | 129282079   | G       | A      | missense | probably damaging | T   | M   | 1509   |
| POLR2G  | 19    | chr1 | 62532690    | T       | A      | missense | probably damaging | F   | I   | 107    |
| POTEB   | 41    | chr1 | 21071492    | G       | T      | missense | benign            | T   | K   | 77     |
| PRAMEF6 | 42    | chr1 | 13368333    | T       | C      | missense | probably damaging | L   | P   | 344    |
| PTGFRN  | 1     | chr1 | 117504257   | T       | G      | missense | probably damaging | S   | A   | 536    |
| PTPN5   | 4     | chr1 | 18763891    | G       | T      | missense | probably damaging | P   | T   | 215    |
| RASA4   | 30    | chr7 | 102246311   | T       | C      | missense | probably damaging | E   | G   | 141    |
| RBM10   | 6     | chrX | 47028856    | A       | T      | nonsense | N/A               | K   | *   | 54     |
| RCN2    | 7     | chr1 | 77227986    | A       | G      | missense | benign            | I   | V   | 124    |
| RNF139  | 3     | chr8 | 125498207   | A       | G      | missense | probably damaging | Y   | C   | 106    |
| SDHALP2 | 32    | chr3 | 195391050   | A       | G      | missense | benign            | R   | G   | 27     |
| SEMA5B  | 13    | chr3 | 122631069   | C       | G      | missense | possibly damaging | C   | S   | 949    |
| SERINC1 | 4     | chr6 | 122779806   | A       | T      | missense | possibly damaging | S   | R   | 20     |
| SGMS1   | 11    | chr1 | 52071030    | A       | C      | missense | probably damaging | I   | S   | 302    |
| SIGLEC5 | 2     | chr1 | 52133292    | A       | G      | missense | benign            | V   | A   | 72     |
| SIPA1L1 | 6     | chr1 | 72090840    | C       | T      | missense | probably damaging | P   | S   | 569    |
| SMAD1   | 13    | chr4 | 146479003   | C       | A      | missense | probably damaging | H   | N   | 439    |
| SMPD3   | 6     | chr1 | 68397715    | C       | T      | missense | probably damaging | R   | H   | 537    |
| SNX26   | 3     | chr1 | 36271912    | T       | G      | missense | probably damaging | I   | S   | 307    |
| SRCAP   | 2     | chr1 | 30727628    | T       | C      | missense | probably damaging | L   | P   | 882    |
| SRGN    | 23    | chr1 | 70856963    | C       | G      | missense | benign            | P   | R   | 68     |
| STAP1   | 24    | chr4 | 68456657    | G       | T      | nonsense | N/A               | E   | *   | 239    |
| STYK1   | 12    | chr1 | 10780311    | T       | C      | missense | benign            | M   | V   | 216    |
| SVIL    | 19    | chr1 | 29779847    | A       | C      | missense | possibly damaging | L   | R   | 1374   |
| SYNGAP1 | 1     | chr6 | 33406290    | T       | C      | missense | probably damaging | I   | T   | 494    |
| TAF5L   | 10    | chr1 | 229738616   | A       | C      | missense | probably damaging | F   | V   | 100    |
| TG      | 11    | chr8 | 133920529   | A       | T      | missense | benign            | T   | S   | 1316   |
| THEMIS  | 23    | chr6 | 128150708   | T       | C      | missense | possibly damaging | K   | E   | 208    |
| TMEM111 | 8     | chr3 | 10018670    | C       | T      | missense | probably damaging | R   | Q   | 93     |
| TMEM49  | 21    | chr1 | 57816208    | G       | A      | missense | benign            | R   | H   | 105    |
| TNIK    | 10    | chr3 | 170856013   | C       | G      | missense | benign            | M   | I   | 525    |
| TNKS    | 14    | chr8 | 9623857     | G       | A      | missense | probably damaging | S   | N   | 1221   |
| TNP2    | 3     | chr1 | 11363049    | C       | A      | missense | benign            | R   | L   | 24     |
| TNRC6B  | 4     | chr2 | 40662135    | G       | A      | nonsense | N/A               | W   | *   | 634    |
| TPSAB1  | 14    | chr1 | 1291831     | G       | C      | missense | benign            | R   | P   | 168    |
| TRAPPC9 | 4     | chr8 | 141297763   | A       | T      | missense | probably damaging | L   | Q   | 740    |
| TRIM77  | 8     | chr1 | 89443644    | C       | T      | nonsense | N/A               | Q   | *   | N/A    |

| Gene   | Pt ID | Chr  | bp position | Curr bp | Mut bp | type     | prediction        | aa1 | aa2 | aa pos |
|--------|-------|------|-------------|---------|--------|----------|-------------------|-----|-----|--------|
| TRPM6  | 2     | chr9 | 77377851    | A       | T      | missense | benign            | C   | S   | 1246   |
| TTC18  | 16    | chr1 | 75091008    | C       | T      | missense | benign            | R   | Q   | 305    |
| TTC23L | 5     | chr5 | 34869023    | G       | A      | missense | probably damaging | C   | Y   | 285    |
| TUBB2A | 7     | chr6 | 3155074     | T       | C      | missense | probably damaging | R   | G   | 121    |
| TULP2  | 3     | chr1 | 49399785    | T       | G      | missense | possibly damaging | Q   | P   | 38     |
| VHL    | 29    | chr3 | 10191495    | T       | G      | missense | probably damaging | L   | R   | 163    |
| VPS52  | 8     | chr6 | 33236938    | T       | C      | missense | probably damaging | Q   | R   | 134    |
| XIRP2  | 15    | chr2 | 168104389   | C       | T      | missense | benign            | P   | S   | 1988   |
| ZBTB38 | 29    | chr3 | 141162033   | C       | T      | missense | benign            | T   | I   | 268    |
| ZBTB40 | 3     | c31  | 22850933    | C       | T      | missense | benign            | A   | V   | 1174   |
| ZNRF4  | 4     | chr1 | 5456169     | C       | T      | missense | probably damaging | R   | W   | 223    |
| ZSCAN2 | 5     | chr1 | 85164460    | A       | G      | missense | possibly damaging | N   | S   | 345    |

SI Table 6: Sequence context of somatic SNV in independent tumor tissues using metastases

| Gene      | Patient No | Query Condition          | Ref->Mut | Result        |
|-----------|------------|--------------------------|----------|---------------|
| AICDA     | 8          | chr12:8758008_8758008    | C>T      | Validated     |
| C16orf46  | 1          | chr16:81094863_81094863  | G>T      | Validated     |
| CARD11    | 4          | chr7:2956964_2956964     | C>T      | Validated     |
| CCDC117   | 1          | chr22:29169745_29169745  | G>A      | Validated     |
| CNOT1     | 3          | chr16:58585058_58585058  | G>A      | Validated     |
| COL4A4    | 1          | chr2:228004909_228004909 | C>G      | Not validated |
| CORIN     | 3          | chr4:47647197_47647197   | C>T      | Validated     |
| DPH2      | 3          | chr1:44436775_44436775   | T>G      | Validated     |
| FAM5C     | 4          | chr1:190250791_190250791 | C>T      | Validated     |
| FAM83C    | 1          | chr20:33876327_33876327  | G>A      | Validated     |
| FGD1      | 4          | chrX:54494335_54494335   | G>A      | Not validated |
| FNDC1     | 4          | chr6:159654566_159654566 | C>T      | Not validated |
| GPAT2     | 13         | chr2:96690175_96690175   | C>T      | Validated     |
| GPR152    | 1          | chr11:67218883_67218883  | G>C      | Validated     |
| GPR68     | 1          | chr14:91701046_91701046  | C>T      | Validated     |
| HAUS4     | 3          | chr14:23417166_23417166  | C>T      | Validated     |
| HIST1H2AC | 13         | chr6:26124714_26124714   | A>T      | Validated     |
| ITGA1     | 1          | chr5:52229777_52229777   | T>A      | Validated     |
| MTOR      | 13         | chr1:11316221_11316221   | C>T      | Validated     |
| MYSM1     | 3          | chr1:59141181_59141181   | C>A      | Validated     |
| NBEAL2    | 1          | chr3:47037310_47037310   | G>A      | Validated     |
| NDEL1     | 1          | chr17:8349109_8349109    | T>A      | Validated     |
| PARP4     | 8          | chr13:25030574_25030574  | A>C      | Not validated |
| PIK3C2A   | 1          | chr11:17167273_17167273  | G>C      | Validated     |
| PLXNA3    | 1          | chrX:153696254_153696254 | C>T      | Validated     |
| PTPN5     | 4          | chr11:18763891_18763891  | G>T      | Validated     |

| <b>Gene</b> | <b>Patient No</b> | <b>Query Condition</b>   | <b>Ref-&gt;Mut</b> | <b>Result</b> |
|-------------|-------------------|--------------------------|--------------------|---------------|
| RNF139      | 3                 | chr8:125498207_125498207 | A>G                | Validated     |
| SEMA5B      | 13                | chr3:122631069_122631069 | C>G                | Validated     |
| SERINC1     | 4                 | chr6:122779806_122779806 | A>T                | Validated     |
| SNX26       | 3                 | chr19:36271912_36271912  | T>G                | Validated     |
| SYNGAP1     | 1                 | chr6:33406290_33406290   | T>C                | Validated     |
| TMEM111     | 8                 | chr3:10018670_10018670   | C>T                | Validated     |
| TRAPPC9     | 4                 | chr8:141297763_141297763 | A>T                | Not validated |
| TULP2       | 3                 | chr19:49399785_49399785  | T>G                | Validated     |
| ZNRF4       | 4                 | chr19:5456169_5456169    | C>T                | Validated     |

SI Table 7: Sanger validation of absence of mutations

| Gene    | Patient No | Query Condition          | Ref->Mut | Result                   |
|---------|------------|--------------------------|----------|--------------------------|
| ABCC12  | 8          | chr16:48167686-48167686  | G -> A   | Validated as "wild type" |
| ABCC12  | 8          | chr16:48167686-48167686  | G -> A   | Validated as "wild type" |
| ABCC12  | 21         | chr16:48167686_48167686  | G->A     | Validated as "wild type" |
| ABCC12  | 3          | chr16:48167686-48167686  | G -> A   | Validated as "wild type" |
| ABCC12  | 4          | chr16:48167686-48167686  | G -> A   | Validated as "wild type" |
| ABCC12  | 36         | chr16:48167686_48167686  | G->A     | Validated as "wild type" |
| ADAMTS6 | 25         | chr5:64748016            | G->C     | Validated as "wild type" |
| ADAMTS6 | 3          | chr5:64748016            | G->C     | Validated as "wild type" |
| ADAMTS6 | 6          | chr5:64748016            | G->C     | Validated as "wild type" |
| ADAMTS6 | 45         | chr5:64748016            | G->C     | Validated as "wild type" |
| ADAMTS6 | 39         | chr5:64748016            | G->C     | Validated as "wild type" |
| ADAMTS6 | 36         | chr5:64748016            | G->C     | Validated as "wild type" |
| AICDA   | 17         | chr12:8758008-8758008    | C->T     | Validated as "wild type" |
| AICDA   | 46         | chr12:8758008-8758008    | C->T     | Validated as "wild type" |
| AICDA   | 3          | chr12:8758008-8758008    | C->T     | Validated as "wild type" |
| AICDA   | 6          | chr12:8758008_8758008    | C->T     | Validated as "wild type" |
| AICDA   | 4          | chr12:8758008-8758008    | C->T     | Validated as "wild type" |
| AICDA   | 29         | chr12:8758008-8758008    | C->T     | Validated as "wild type" |
| AKAP6   | 8          | chr14:33292849-33292849  | G -> T   | Validated as "wild type" |
| AKAP6   | 1          | chr14:33292849-33292849  | G -> T   | Validated as "wild type" |
| AKAP6   | 25         | chr14:33292849_33292849  | G->T     | Validated as "wild type" |
| AKAP6   | 3          | chr14:33292849-33292849  | G -> T   | Validated as "wild type" |
| AKAP6   | 4          | chr14:33292849-33292849  | G -> T   | Validated as "wild type" |
| AKAP6   | 45         | chr14:33292849_33292849  | G->T     | Validated as "wild type" |
| APOB    | 33         | chr2:21237379-21237379   | G->T     | Validated as "wild type" |
| APOB    | 41         | chr2:21237379-21237379   | G->T     | Validated as "wild type" |
| APOB    | 32         | chr2:21237379-21237379   | G->T     | Validated as "wild type" |
| APOB    | 35         | chr2:21237379-21237379   | G->T     | Validated as "wild type" |
| APOB    | 28         | chr2:21237379-21237379   | G->T     | Validated as "wild type" |
| APOB    | 39         | chr2:21237379-21237379   | G->T     | Validated as "wild type" |
| ASCC3   | 8          | chr6:100988080_100988080 | C->T     | Validated as "wild type" |
| ASCC3   | 21         | chr6:100988080_100988080 | C->T     | Validated as "wild type" |
| ASCC3   | 3          | chr6:100988080_100988080 | C->T     | Validated as "wild type" |
| ASCC3   | 6          | chr6:100988080_100988080 | C->T     | Validated as "wild type" |
| ASCC3   | 4          | chr6:100988080_100988080 | C->T     | Validated as "wild type" |
| ASCC3   | 45         | chr6:100988080_100988080 | C->T     | Validated as "wild type" |
| CAPN7   | 8          | chr3:15262338            | C->G     | Validated as "wild type" |
| CAPN7   | 48         | chr3:15262338            | C->G     | Validated as "wild type" |
| CAPN7   | 1          | chr3:15262338            | C->G     | Validated as "wild type" |
| CAPN7   | 17         | chr3:15262338            | C->G     | Validated as "wild type" |
| CAPN7   | 41         | chr3:15262338            | C->G     | Validated as "wild type" |
| CAPN7   | 32         | chr3:15262338            | C->G     | Validated as "wild type" |
| CAPN7   | 28         | chr3:15262338            | C->G     | Validated as "wild type" |

| Gene   | Patient No | Query Condition          | Ref->Mut | Result                   |
|--------|------------|--------------------------|----------|--------------------------|
| CAPN7  | 45         | chr3:15262338            | C->G     | Validated as "wild type" |
| CARD11 | 41         | chr7:2956964-2956964     | C ->T    | Validated as "wild type" |
| CARD11 | 32         | chr7:2956964-2956964     | C ->T    | Validated as "wild type" |
| CARD11 | 35         | chr7:2956964-2956964     | C ->T    | Validated as "wild type" |
| CARD11 | 47         | chr7:2956964-2956964     | C ->T    | Validated as "wild type" |
| CARD11 | 28         | chr7:2956964-2956964     | C ->T    | Validated as "wild type" |
| CARD11 | 39         | chr7:2956964-2956964     | C ->T    | Validated as "wild type" |
| COL4A4 | 33         | chr2:228004909-228004909 | C->G     | Validated as "wild type" |
| COL4A4 | 25         | chr2:228004909_228004909 | C->G     | Validated as "wild type" |
| COL4A4 | 41         | chr2:228004909-228004909 | C->G     | Validated as "wild type" |
| COL4A4 | 6          | chr2:228004909_228004909 | C->G     | Validated as "wild type" |
| COL4A4 | 45         | chr2:228004909_228004909 | C->G     | Validated as "wild type" |
| COL4A4 | 36         | chr2:228004909-228004909 | C->G     | Validated as "wild type" |
| CORIN  | 48         | chr4:47647197_47647197   | C->T     | Validated as "wild type" |
| CORIN  | 28         | chr4:47647197_47647197   | C->T     | Validated as "wild type" |
| CORIN  | 39         | chr4:47647197_47647197   | C->T     | Validated as "wild type" |
| CORIN  | 36         | chr4:47647197_47647197   | C->T     | Validated as "wild type" |
| DBR1   | 17         | chr3:137890486_137890486 | T->C     | Validated as "wild type" |
| DBR1   | 25         | chr3:137890486_137890486 | T->C     | Validated as "wild type" |
| DBR1   | 46         | chr3:137890486_137890486 | T->C     | Validated as "wild type" |
| DBR1   | 32         | chr3:137890486_137890486 | T->C     | Validated as "wild type" |
| DBR1   | 47         | chr3:137890486_137890486 | T->C     | Validated as "wild type" |
| DBR1   | 29         | chr3:137890486_137890486 | T->C     | Validated as "wild type" |
| DDX60  | 33         | chr4:169188789-169188789 | G->T     | Validated as "wild type" |
| DDX60  | 32         | chr4:169188789-169188789 | G->T     | Validated as "wild type" |
| DDX60  | 35         | chr4:169188789-169188789 | G->T     | Validated as "wild type" |
| DDX60  | 47         | chr4:169188789-169188789 | G->T     | Validated as "wild type" |
| DDX60  | 39         | chr4:169188789-169188789 | G->T     | Validated as "wild type" |
| DDX60  | 36         | chr4:169188789-169188789 | G->T     | Validated as "wild type" |
| DHRS7B | 1          | chr17:21094386           | C->G     | Validated as "wild type" |
| DHRS7B | 17         | chr17:21094386           | C->G     | Validated as "wild type" |
| DHRS7B | 25         | chr17:21094386           | C->G     | Validated as "wild type" |
| DHRS7B | 41         | chr17:21094386           | C->G     | Validated as "wild type" |
| DHRS7B | 47         | chr17:21094386           | C->G     | Validated as "wild type" |
| DHRS7B | 4          | chr17:21094386           | C->G     | Validated as "wild type" |
| DHRS7B | 29         | chr17:21094386           | C->G     | Validated as "wild type" |
| DHRS7B | 36         | chr17:21094386           | C->G     | Validated as "wild type" |
| DNAH7  | 17         | chr2:196723400-196723400 | T -> C   | Validated as "wild type" |
| DNAH7  | 32         | chr2:196723400-196723400 | T -> C   | Validated as "wild type" |
| DNAH7  | 47         | chr2:196723400-196723400 | T -> C   | Validated as "wild type" |
| DNAH7  | 28         | chr2:196723400-196723400 | T -> C   | Validated as "wild type" |
| DNAH7  | 29         | chr2:196723400-196723400 | T -> C   | Validated as "wild type" |
| DPH2   | 33         | chr1:44436775_44436775   | T->G     | Validated as "wild type" |
| DPH2   | 1          | chr1:44436775-44436775   | T->G     | Validated as "wild type" |
| DPH2   | 25         | chr1:44436775_44436775   | T->G     | Validated as "wild type" |
| DPH2   | 6          | chr1:44436775_44436775   | T->G     | Validated as "wild type" |
| DPH2   | 4          | chr1:44436775-44436775   | T->G     | Validated as "wild type" |
| DPH2   | 45         | chr1:44436775_44436775   | T->G     | Validated as "wild type" |

| Gene    | Patient No | Query Condition          | Ref->Mut | Result                   |
|---------|------------|--------------------------|----------|--------------------------|
| EPB41   | 8          | chr1:29379748            | A->G     | Validated as "wild type" |
| EPB41   | 17         | chr1:29379748            | A->G     | Validated as "wild type" |
| EPB41   | 41         | chr1:29379748            | A->G     | Validated as "wild type" |
| EPB41   | 32         | chr1:29379748            | A->G     | Validated as "wild type" |
| EPB41   | 3          | chr1:29379748            | A->G     | Validated as "wild type" |
| EPB41   | 45         | chr1:29379748            | A->G     | Validated as "wild type" |
| EPB41   | 45         | chr1:29379748            | A->G     | Validated as "wild type" |
| EPB41   | 36         | chr1:29379748            | A->G     | Validated as "wild type" |
| FABP3   | 8          | chr1:31840281_31840281   | T->A     | Validated as "wild type" |
| FABP3   | 33         | chr1:31,840,281          | T->A     | Validated as "wild type" |
| FABP3   | 1          | chr1:31840281_31840281   | T->A     | Validated as "wild type" |
| FABP3   | 41         | chr1:31,840,281          | T->A     | Validated as "wild type" |
| FABP3   | 35         | chr1:31,840,281          | T->A     | Validated as "wild type" |
| FABP3   | 4          | chr1:31840281_31840281   | T->A     | Validated as "wild type" |
| FAM153C | 48         | chr5:177468759           | C->T     | Validated as "wild type" |
| FAM153C | 41         | chr5:177468759           | C->T     | Validated as "wild type" |
| FAM153C | 21         | chr5:177468759           | C->T     | Validated as "wild type" |
| FAM153C | 35         | chr5:177468759           | C->T     | Validated as "wild type" |
| FAM153C | 47         | chr5:177468759           | C->T     | Validated as "wild type" |
| FAM153C | 6          | chr5:177468759           | C->T     | Validated as "wild type" |
| FAM153C | 28         | chr5:177468759           | C->T     | Validated as "wild type" |
| FAM153C | 29         | chr5:177468759           | C->T     | Validated as "wild type" |
| FAM83C  | 48         | chr20:33876327_33876327  | G->A     | Validated as "wild type" |
| FAM83C  | 41         | chr20:33876327_33876327  | G->A     | Validated as "wild type" |
| FAM83C  | 35         | chr20:33876327_33876327  | G->A     | Validated as "wild type" |
| FAM83C  | 47         | chr20:33876327_33876327  | G->A     | Validated as "wild type" |
| FAM83C  | 39         | chr20:33876327_33876327  | G->A     | Validated as "wild type" |
| FAM83C  | 36         | chr20:33876327_33876327  | G->A     | Validated as "wild type" |
| FNDC1   | 17         | chr6:159654566-159654566 | C->T     | Validated as "wild type" |
| FNDC1   | 46         | chr6:159654566_159654566 | C->T     | Validated as "wild type" |
| FNDC1   | 29         | chr6:159654566-159654566 | C->T     | Validated as "wild type" |
| GALNT14 | 48         | chr2:31133822-31133822   | A -> G   | Validated as "wild type" |
| GALNT14 | 1          | chr2:31133822-31133822   | A -> G   | Validated as "wild type" |
| GALNT14 | 46         | chr2:31133822-31133822   | A -> G   | Validated as "wild type" |
| GALNT14 | 3          | chr2:31133822-31133822   | A -> G   | Validated as "wild type" |
| GALNT14 | 4          | chr2:31133822-31133822   | A -> G   | Validated as "wild type" |
| GALNT14 | 29         | chr2:31133822-31133822   | A -> G   | Validated as "wild type" |
| GNAT2   | 8          | chr1:110146671_110146671 | A->G     | Validated as "wild type" |
| GNAT2   | 48         | chr1:110146671-110146671 | A -> G   | Validated as "wild type" |
| GNAT2   | 1          | chr1:110146671_110146671 | A->G     | Validated as "wild type" |
| GNAT2   | 17         | chr1:110146671-110146671 | A -> G   | Validated as "wild type" |
| GNAT2   | 4          | chr1:110146671_110146671 | A->G     | Validated as "wild type" |
| GNAT2   | 29         | chr1:110146671-110146671 | A -> G   | Validated as "wild type" |
| GPAT2   | 33         | chr2:96690175-96690175   | C ->T    | Validated as "wild type" |
| GPAT2   | 41         | chr2:96690175-96690175   | C ->T    | Validated as "wild type" |
| GPAT2   | 32         | chr2:96690175-96690175   | C ->T    | Validated as "wild type" |
| GPAT2   | 47         | chr2:96690175-96690175   | C ->T    | Validated as "wild type" |

| Gene     | Patient No | Query Condition         | Ref->Mut | Result                   |
|----------|------------|-------------------------|----------|--------------------------|
| GPAT2    | 39         | chr2:96690175-96690175  | C ->T    | Validated as "wild type" |
| GPAT2    | 36         | chr2:96690175-96690175  | C ->T    | Validated as "wild type" |
| HAGHL    | 33         | chr16:779430_779430     | C->A     | Validated as "wild type" |
| HAGHL    | 32         | chr16:779430_779430     | C->A     | Validated as "wild type" |
| HAGHL    | 35         | chr16:779430_779430     | C->A     | Validated as "wild type" |
| HAGHL    | 47         | chr16:779430_779430     | C->A     | Validated as "wild type" |
| HAGHL    | 39         | chr16:779430_779430     | C->A     | Validated as "wild type" |
| HAGHL    | 36         | chr16:779430_779430     | C->A     | Validated as "wild type" |
| HAUS4    | 33         | chr14:23417166_23417166 | C->T     | Validated as "wild type" |
| HAUS4    | 1          | chr14:23417166-23417166 | C->T     | Validated as "wild type" |
| HAUS4    | 46         | chr14:23417166_23417166 | C->T     | Validated as "wild type" |
| HAUS4    | 41         | chr14:23417166_23417166 | C->T     | Validated as "wild type" |
| HAUS4    | 35         | chr14:23417166_23417166 | C->T     | Validated as "wild type" |
| HAUS4    | 47         | chr14:23417166_23417166 | C->T     | Validated as "wild type" |
| HAUS4    | 4          | chr14:23417166-23417166 | C->T     | Validated as "wild type" |
| HAUS4    | 28         | chr14:23417166_23417166 | C->T     | Validated as "wild type" |
| HAUS4    | 29         | chr14:23417166_23417166 | C->T     | Validated as "wild type" |
| HAUS4    | 45         | chr14:23417166_23417166 | C->T     | Validated as "wild type" |
| HAUS4    | 39         | chr14:23417166_23417166 | C->T     | Validated as "wild type" |
| HAUS4    | 36         | chr14:23417166_23417166 | C->T     | Validated as "wild type" |
| HSPH1    | 8          | chr13:31713024_31713024 | G->A     | Validated as "wild type" |
| HSPH1    | 25         | chr13:31713024_31713024 | G->A     | Validated as "wild type" |
| HSPH1    | 21         | chr13:31713024_31713024 | G->A     | Validated as "wild type" |
| HSPH1    | 3          | chr13:31713024_31713024 | G->A     | Validated as "wild type" |
| HSPH1    | 4          | chr13:31713024_31713024 | G->A     | Validated as "wild type" |
| HSPH1    | 45         | chr13:31713024_31713024 | G->A     | Validated as "wild type" |
| ICMT     | 8          | chr1:6285164            | T->C     | Validated as "wild type" |
| ICMT     | 33         | chr1:6285164            | T->C     | Validated as "wild type" |
| ICMT     | 1          | chr1:6285164            | T->C     | Validated as "wild type" |
| ICMT     | 46         | chr1:6285164            | T->C     | Validated as "wild type" |
| ICMT     | 41         | chr1:6285164            | T->C     | Validated as "wild type" |
| ICMT     | 3          | chr1:6285164            | T->C     | Validated as "wild type" |
| ICMT     | 45         | chr1:6285164            | T->C     | Validated as "wild type" |
| ICMT     | 39         | chr1:6285164            | T->C     | Validated as "wild type" |
| ITGA1    | 33         | chr5:52229777_52229777  | T->A     | Validated as "wild type" |
| ITGA1    | 25         | chr5:52229777_52229777  | T->A     | Validated as "wild type" |
| ITGA1    | 21         | chr5:52229777_52229777  | T->A     | Validated as "wild type" |
| ITGA1    | 35         | chr5:52229777_52229777  | T->A     | Validated as "wild type" |
| ITGA1    | 39         | chr5:52229777_52229777  | T->A     | Validated as "wild type" |
| ITGA1    | 36         | chr5:52229777_52229777  | T->A     | Validated as "wild type" |
| KIAA0232 | 48         | chr4:6826352-6826352    | A->G     | Validated as "wild type" |
| KIAA0232 | 46         | chr4:6826352-6826352    | A->G     | Validated as "wild type" |
| KIAA0232 | 32         | chr4:6826352-6826352    | A->G     | Validated as "wild type" |
| KIAA0232 | 47         | chr4:6826352-6826352    | A->G     | Validated as "wild type" |
| KIAA0232 | 28         | chr4:6826352-6826352    | A->G     | Validated as "wild type" |
| KIAA0232 | 29         | chr4:6826352-6826352    | A->G     | Validated as "wild type" |
| KRT24    | 8          | chr17:38859884-38859884 | G->A     | Validated as "wild type" |
| KRT24    | 1          | chr17:38859884-38859884 | G->A     | Validated as "wild type" |

| Gene     | Patient No | Query Condition          | Ref->Mut | Result                   |
|----------|------------|--------------------------|----------|--------------------------|
| KRT24    | 25         | chr17:38859884_38859884  | G->T     | Validated as "wild type" |
| KRT24    | 21         | chr17:38859884_38859884  | G->T     | Validated as "wild type" |
| KRT24    | 6          | chr17:38859884_38859884  | G->T     | Validated as "wild type" |
| KRT24    | 4          | chr17:38859884-38859884  | G->A     | Validated as "wild type" |
| MAP4K1   | 48         | chr19:39083940-39083940  | C -> T   | Validated as "wild type" |
| MAP4K1   | 17         | chr19:39083940-39083940  | C -> T   | Validated as "wild type" |
| MAP4K1   | 46         | chr19:39083940-39083940  | C -> T   | Validated as "wild type" |
| MAP4K1   | 47         | chr19:39083940-39083940  | C->T     | Validated as "wild type" |
| MAP4K1   | 28         | chr19:39083940-39083940  | C->T     | Validated as "wild type" |
| MAP4K1   | 39         | chr19:39083940-39083940  | C->T     | Validated as "wild type" |
| MARVELD2 | 17         | chr5:68715500            | C->G     | Validated as "wild type" |
| MARVELD2 | 25         | chr5:68715500            | C->G     | Validated as "wild type" |
| MARVELD2 | 46         | chr5:68715500            | C->G     | Validated as "wild type" |
| MARVELD2 | 41         | chr5:68715500            | C->G     | Validated as "wild type" |
| MARVELD2 | 47         | chr5:68715500            | C->G     | Validated as "wild type" |
| MARVELD2 | 39         | chr5:68715500            | C->G     | Validated as "wild type" |
| MARVELD2 | 36         | chr5:68715500            | C->G     | Validated as "wild type" |
| MEN1     | 25         | chr11:64577233           | G->C     | Validated as "wild type" |
| MEN1     | 21         | chr11:64577233           | G->C     | Validated as "wild type" |
| MEN1     | 28         | chr11:64577233           | G->C     | Validated as "wild type" |
| MYOM3    | 8          | chr1:24397614_24397614   | C->A     | Validated as "wild type" |
| MYOM3    | 1          | chr1:24397614_24397614   | C->A     | Validated as "wild type" |
| MYOM3    | 21         | chr1:24397614_24397614   | C->A     | Validated as "wild type" |
| MYOM3    | 3          | chr1:24397614_24397614   | C->A     | Validated as "wild type" |
| MYOM3    | 4          | chr1:24397614_24397614   | C->A     | Validated as "wild type" |
| MYOM3    | 45         | chr1:24397614_24397614   | C->A     | Validated as "wild type" |
| MYSM1    | 25         | chr1:59141181_59141181   | C->A     | Validated as "wild type" |
| MYSM1    | 41         | chr1:59141181-59141181   | C->A     | Validated as "wild type" |
| MYSM1    | 35         | chr1:59141181-59141181   | C->A     | Validated as "wild type" |
| MYSM1    | 6          | chr1:59141181_59141181   | C->A     | Validated as "wild type" |
| MYSM1    | 45         | chr1:59141181_59141181   | C->A     | Validated as "wild type" |
| MYSM1    | 36         | chr1:59141181-59141181   | C->A     | Validated as "wild type" |
| NDEL1    | 8          | chr17:8349109_8349109    | T->A     | Validated as "wild type" |
| NDEL1    | 3          | chr17:8349109_8349109    | T->A     | Validated as "wild type" |
| NDEL1    | 6          | chr17:8349109_8349109    | T->A     | Validated as "wild type" |
| NDEL1    | 4          | chr17:8349109_8349109    | T->A     | Validated as "wild type" |
| NDEL1    | 45         | chr17:8349109_8349109    | T->A     | Validated as "wild type" |
| NDST4    | 33         | chr4:115997466-115997466 | A -> T   | Validated as "wild type" |
| NDST4    | 25         | chr4:115997466_115997466 | A->T     | Validated as "wild type" |
| NDST4    | 21         | chr4:115997466_115997466 | A->T     | Validated as "wild type" |
| NDST4    | 35         | chr4:115997466-115997466 | A -> T   | Validated as "wild type" |
| NDST4    | 6          | chr4:115997466_115997466 | A->T     | Validated as "wild type" |
| NDST4    | 36         | chr4:115997466-115997466 | A -> T   | Validated as "wild type" |
| NEK1     | 48         | chr4:170483347           | C->T     | Validated as "wild type" |
| NEK1     | 1          | chr4:170483347           | C->T     | Validated as "wild type" |
| NEK1     | 21         | chr4:170483347           | C->T     | Validated as "wild type" |
| NEK1     | 32         | chr4:170483347           | C->T     | Validated as "wild type" |



| Gene   | Patient No | Query Condition          | Ref->Mut | Result                   |
|--------|------------|--------------------------|----------|--------------------------|
| NEK1   | 35         | chr4:170483347           | C->T     | Validated as "wild type" |
| NEK1   | 4          | chr4:170483347           | C->T     | Validated as "wild type" |
| NEK1   | 29         | chr4:170483347           | C->T     | Validated as "wild type" |
| NEK1   | 36         | chr4:170483347           | C->T     | Validated as "wild type" |
| NHS    | 48         | chr4:17744016-17744016   | C->A     | Validated as "wild type" |
| NHS    | 46         | chr4:17744016-17744016   | C->A     | Validated as "wild type" |
| NHS    | 32         | chr4:17744016-17744016   | C->A     | Validated as "wild type" |
| NHS    | 47         | chr4:17744016-17744016   | C->A     | Validated as "wild type" |
| NHS    | 28         | chr4:17744016-17744016   | C->A     | Validated as "wild type" |
| NHS    | 29         | chr4:17744016-17744016   | C->A     | Validated as "wild type" |
| NLRP3  | 8          | chr1:247588841           | G->A     | Validated as "wild type" |
| NLRP3  | 1          | chr1:247588841           | G->A     | Validated as "wild type" |
| NLRP3  | 25         | chr1:247588841           | G->A     | Validated as "wild type" |
| NLRP3  | 21         | chr1:247588841           | G->A     | Validated as "wild type" |
| NLRP3  | 35         | chr1:247588841           | G->A     | Validated as "wild type" |
| NLRP3  | 47         | chr1:247588841           | G->A     | Validated as "wild type" |
| NLRP3  | 36         | chr1:247588841           | G->A     | Validated as "wild type" |
| OR10J1 | 8          | chr1:159410465-159410465 | A -> C   | Validated as "wild type" |
| OR10J1 | 33         | chr1:159410465-159410465 | A->C     | Validated as "wild type" |
| OR10J1 | 1          | chr1:159410465-159410465 | A -> C   | Validated as "wild type" |
| OR10J1 | 32         | chr1:159410465-159410465 | A->C     | Validated as "wild type" |
| OR10J1 | 3          | chr1:159410465-159410465 | A -> C   | Validated as "wild type" |
| OR10J1 | 45         | chr1:159410465-159410465 | A->C     | Validated as "wild type" |
| OR10J1 | 36         | chr1:159410465-159410465 | A->C     | Validated as "wild type" |
| PAN2   | 33         | chr12:56713109-56713109  | G->A     | Validated as "wild type" |
| PAN2   | 25         | chr12:56713109_56713109  | G->A     | Validated as "wild type" |
| PAN2   | 41         | chr12:56713109-56713109  | G->A     | Validated as "wild type" |
| PAN2   | 21         | chr12:56713109_56713109  | G->A     | Validated as "wild type" |
| PAN2   | 35         | chr12:56713109-56713109  | G->A     | Validated as "wild type" |
| PAN2   | 6          | chr12:56713109_56713109  | G->A     | Validated as "wild type" |
| PAN2   | 36         | chr12:56713109-56713109  | G->A     | Validated as "wild type" |
| PAN3   | 17         | chr13:28794512-28794512  | C -> G   | Validated as "wild type" |
| PAN3   | 46         | chr13:28794512-28794512  | C -> G   | Validated as "wild type" |
| PAN3   | 32         | chr13:28794512-28794512  | C -> G   | Validated as "wild type" |
| PAN3   | 28         | chr13:28794512-28794512  | C -> G   | Validated as "wild type" |
| PAN3   | 29         | chr13:28794512-28794512  | C -> G   | Validated as "wild type" |
| PARP4  | 33         | chr13:25030574-25030574  | A -> C   | Validated as "wild type" |
| PARP4  | 25         | chr13:25030574_25030574  | A->C     | Validated as "wild type" |
| PARP4  | 21         | chr13:25030574_25030574  | A->C     | Validated as "wild type" |
| PARP4  | 35         | chr13:25030574-25030574  | A -> C   | Validated as "wild type" |
| PARP4  | 6          | chr13:25030574_25030574  | A->C     | Validated as "wild type" |
| PARP4  | 36         | chr13:25030574-25030574  | A -> C   | Validated as "wild type" |
| PCDH7  | 1          | chr4:30725445_30725445   | G->T     | Validated as "wild type" |
| PCDH7  | 25         | chr4:30725445_30725445   | G->T     | Validated as "wild type" |
| PCDH7  | 21         | chr4:30725445_30725445   | G->T     | Validated as "wild type" |
| PCDH7  | 6          | chr4:30725445_30725445   | G->T     | Validated as "wild type" |
| PCDH7  | 4          | chr4:30725445_30725445   | G->T     | Validated as "wild type" |

| Gene    | Patient No | Query Condition          | Ref->Mut | Result                   |
|---------|------------|--------------------------|----------|--------------------------|
| PCDH7   | 45         | chr4:30725445_30725445   | G->T     | Validated as "wild type" |
| PCDHB12 | 8          | chr5:140588938_140588938 | G->T     | Validated as "wild type" |
| PCDHB12 | 48         | chr5:140588938-140588938 | G->T     | Validated as "wild type" |
| PCDHB12 | 17         | chr5:140588938-140588938 | G->T     | Validated as "wild type" |
| PCDHB12 | 3          | chr5:140588938_140588938 | G->T     | Validated as "wild type" |
| PCDHB12 | 4          | chr5:140588938_140588938 | G->T     | Validated as "wild type" |
| PDIA5   | 8          | chr3:122864976_122864976 | A->C     | Validated as "wild type" |
| PDIA5   | 1          | chr3:122864976_122864976 | A->C     | Validated as "wild type" |
| PDIA5   | 21         | chr3:122864976_122864976 | A->C     | Validated as "wild type" |
| PDIA5   | 3          | chr3:122864976_122864976 | A->C     | Validated as "wild type" |
| PDIA5   | 6          | chr3:122864976_122864976 | A->C     | Validated as "wild type" |
| PDIA5   | 45         | chr3:122864976_122864976 | A->C     | Validated as "wild type" |
| PIK3C2A | 48         | chr11:17167273-17167273  | G->C     | Validated as "wild type" |
| PIK3C2A | 46         | chr11:17167273-17167273  | G->C     | Validated as "wild type" |
| PIK3C2A | 47         | chr11:17167273-17167273  | G->C     | Validated as "wild type" |
| PIK3C2A | 28         | chr11:17167273-17167273  | G->C     | Validated as "wild type" |
| PIK3C2A | 29         | chr11:17167273-17167273  | G->C     | Validated as "wild type" |
| PIK3C2A | 39         | chr11:17167273-17167273  | G->C     | Validated as "wild type" |
| POLR2G  | 28         | chr11:62532690           | T->A     | Validated as "wild type" |
| POTEB   | 33         | chr15:21071492           | G->T     | Validated as "wild type" |
| POTEB   | 46         | chr15:21071492           | G->T     | Validated as "wild type" |
| POTEB   | 21         | chr15:21071492           | G->T     | Validated as "wild type" |
| POTEB   | 32         | chr15:21071492           | G->T     | Validated as "wild type" |
| POTEB   | 3          | chr15:21071492           | G->T     | Validated as "wild type" |
| POTEB   | 6          | chr15:21071492           | G->T     | Validated as "wild type" |
| POTEB   | 4          | chr15:21071492           | G->T     | Validated as "wild type" |
| POTEB   | 28         | chr15:21071492           | G->T     | Validated as "wild type" |
| RCN2    | 48         | chr15:77227986-77227986  | A->G     | Validated as "wild type" |
| RCN2    | 33         | chr15:77227986-77227986  | A->G     | Validated as "wild type" |
| RCN2    | 17         | chr15:77227986-77227986  | A->G     | Validated as "wild type" |
| RCN2    | 46         | chr15:77227986-77227986  | A->G     | Validated as "wild type" |
| RCN2    | 35         | chr15:77227986-77227986  | A->G     | Validated as "wild type" |
| RNF139  | 48         | chr8:125498207-125498207 | A->G     | Validated as "wild type" |
| RNF139  | 17         | chr8:125498207-125498207 | A->G     | Validated as "wild type" |
| RNF139  | 47         | chr8:125498207-125498207 | A->G     | Validated as "wild type" |
| RNF139  | 28         | chr8:125498207-125498207 | A->G     | Validated as "wild type" |
| RNF139  | 29         | chr8:125498207-125498207 | A->G     | Validated as "wild type" |
| RNF139  | 39         | chr8:125498207-125498207 | A->G     | Validated as "wild type" |
| SEMA5B  | 8          | chr3:122631069_122631069 | C->G     | Validated as "wild type" |
| SEMA5B  | 1          | chr3:122631069_122631069 | C->G     | Validated as "wild type" |
| SEMA5B  | 25         | chr3:122631069_122631069 | C->G     | Validated as "wild type" |
| SEMA5B  | 21         | chr3:122631069_122631069 | C->G     | Validated as "wild type" |
| SEMA5B  | 3          | chr3:122631069_122631069 | C->G     | Validated as "wild type" |
| SEMA5B  | 45         | chr3:122631069_122631069 | C->G     | Validated as "wild type" |
| SMAD1   | 48         | chr4:146479003           | C->A     | Validated as "wild type" |
| SMAD1   | 35         | chr4:146479003           | C->A     | Validated as "wild type" |
| SMAD1   | 6          | chr4:146479003           | C->A     | Validated as "wild type" |

| Gene    | Patient No | Query Condition          | Ref->Mut | Result                   |
|---------|------------|--------------------------|----------|--------------------------|
| SMAD1   | 4          | chr4:146479003           | C->A     | Validated as "wild type" |
| SMAD1   | 28         | chr4:146479003           | C->A     | Validated as "wild type" |
| SMAD1   | 29         | chr4:146479003           | C->A     | Validated as "wild type" |
| SMAD1   | 45         | chr4:146479003           | C->A     | Validated as "wild type" |
| SMAD1   | 39         | chr4:146479003           | C->A     | Validated as "wild type" |
| TMEM111 | 33         | chr3:10018670_10018670   | C->T     | Validated as "wild type" |
| TMEM111 | 41         | chr3:10018670_10018670   | C->T     | Validated as "wild type" |
| TMEM111 | 21         | chr3:10018670_10018670   | C->T     | Validated as "wild type" |
| TMEM111 | 35         | chr3:10018670_10018670   | C->T     | Validated as "wild type" |
| TMEM111 | 28         | chr3:10018670_10018670   | C->T     | Validated as "wild type" |
| TMEM111 | 45         | chr3:10018670_10018670   | C->T     | Validated as "wild type" |
| TNIK    | 33         | chr3:170856013_170856013 | C->G     | Validated as "wild type" |
| TNIK    | 25         | chr3:170856013_170856013 | C->G     | Validated as "wild type" |
| TNIK    | 41         | chr3:170856013_170856013 | C->G     | Validated as "wild type" |
| TNIK    | 21         | chr3:170856013_170856013 | C->G     | Validated as "wild type" |
| TNIK    | 6          | chr3:170856013_170856013 | C->G     | Validated as "wild type" |
| TNIK    | 36         | chr3:170856013_170856013 | C->G     | Validated as "wild type" |
| TRAPPC9 | 48         | chr8:141297763-141297763 | A -> T   | Validated as "wild type" |
| TRAPPC9 | 17         | chr8:141297763-141297763 | A -> T   | Validated as "wild type" |
| TRAPPC9 | 46         | chr8:141297763-141297763 | A -> T   | Validated as "wild type" |
| TRAPPC9 | 32         | chr8:141297763_141297763 | A->T     | Validated as "wild type" |
| TRAPPC9 | 39         | chr8:141297763_141297763 | A->T     | Validated as "wild type" |
| TUBB2A  | 33         | chr6:3155074-3155074     | T->C     | Validated as "wild type" |
| TUBB2A  | 41         | chr6:3155074-3155074     | T->C     | Validated as "wild type" |
| TUBB2A  | 32         | chr6:3155074-3155074     | T->C     | Validated as "wild type" |
| TUBB2A  | 35         | chr6:3155074-3155074     | T->C     | Validated as "wild type" |
| TUBB2A  | 39         | chr6:3155074-3155074     | T->C     | Validated as "wild type" |
| TUBB2A  | 36         | chr6:3155074-3155074     | T->C     | Validated as "wild type" |
| TULP2   | 17         | chr19:49399785-49399785  | T->G     | Validated as "wild type" |
| TULP2   | 46         | chr19:49399785-49399785  | T->G     | Validated as "wild type" |
| TULP2   | 32         | chr19:49399785_49399785  | T->G     | Validated as "wild type" |
| TULP2   | 29         | chr19:49399785-49399785  | T->G     | Validated as "wild type" |
| TULP2   | 39         | chr19:49399785_49399785  | T->G     | Validated as "wild type" |
| ZNF512B | 8          | chr20:62594991_62594991  | T->C     | Validated as "wild type" |
| ZNF512B | 48         | chr20:62594991-62594991  | T->C     | Validated as "wild type" |
| ZNF512B | 1          | chr20:62594991_62594991  | T->C     | Validated as "wild type" |
| ZNF512B | 17         | chr20:62594991-62594991  | T->C     | Validated as "wild type" |
| ZNF512B | 46         | chr20:62594991-62594991  | T->C     | Validated as "wild type" |
| ZNF512B | 29         | chr20:62594991-62594991  | T->C     | Validated as "wild type" |
| ZSCAN2  | 8          | chr15:85164460_85164460  | A->G     | Validated as "wild type" |
| ZSCAN2  | 1          | chr15:85164460_85164460  | A->G     | Validated as "wild type" |
| ZSCAN2  | 17         | chr15:85164460-85164460  | A->G     | Validated as "wild type" |
| ZSCAN2  | 46         | chr15:85164460-85164460  | A->G     | Validated as "wild type" |
| ZSCAN2  | 3          | chr15:85164460_85164460  | A->G     | Validated as "wild type" |
| ZSCAN2  | 29         | chr15:85164460-85164460  | A->G     | Validated as "wild type" |

SI Table 8: Deep sequencing of a panel of cancer genes

| Specimen             | Number of Amplicons* | Mean Depth | Lower 95% | Upper 95% |
|----------------------|----------------------|------------|-----------|-----------|
| Pt 9 normal tissue   | 215                  | 4711       | 4396      | 5026      |
| Pt. 9 tumor          | 215                  | 5292       | 4881      | 5703      |
| Pt. 7 normal tissue  | 215                  | 3060       | 2743      | 3377      |
| Pt. 7 tumor          | 215                  | 2341       | 2077      | 2606      |
| Pt. 13 normal tissue | 215                  | 5489       | 5023      | 5955      |
| Pt. 13 tumor         | 215                  | 7767       | 7225      | 8309      |
| Pt. 3 normal tissue  | 215                  | 1970       | 1775      | 2166      |
| Pt. 3 tumor          | 215                  | 2772       | 2559      | 2986      |
| Pt. 6 normal tissue  | 215                  | 4329       | 3941      | 4717      |
| Pt. 6 tumor          | 215                  | 3501       | 3223      | 3780      |
| Pt. 22 normal tissue | 215                  | 4307       | 3864      | 4751      |
| Pt. 22 tumor         | 215                  | 3168       | 2824      | 3512      |
| Pt. 4 normal tissue  | 215                  | 4467       | 4038      | 4896      |
| Pt. 4 tumor          | 215                  | 2446       | 2264      | 2628      |
| Pt 2 normal tissue   | 215                  | 4199       | 3789      | 4610      |
| Pt 2 tumor           | 215                  | 3071       | 2805      | 3336      |

\* Genes included in the panel are *ABL1*; *AKT1*; *ALK*; *APC*; *ATM*; *BRAF*; *CDH11*; *CDKN2A*; *CSF1R*; *CSTNNB1*; *EGFR*; *ERBB2*; *FBXW7*; *FLT3*; *GNA11*; *GNAQ*; *HNFL1A*; *HRAS*; *IDH1*; *JAK2*; *JAK3*; *KDR*; *KIT*; *KRAS*; *MET*; *MLH1*; *MPL*; *NOTCH1*; *NPM1*; *NRAS*; *PDGFRA*; *PIK3CA*; *PTEN*; *PTPN11*; *RBI*; *RET*; *SMAD4*; *SMARCB1*; *SMO*; *SRC*; *STK11*; *TP53*; *VHL*.

SI Table 9. Significance level of SCNA per permutation analysis

| Tumor ID | Large Scale Amplification | Large Scale Deletion | Focal Amplification | Focal Deletion |
|----------|---------------------------|----------------------|---------------------|----------------|
| 1        | <0.02                     | <0.02                | <0.02               | <0.02          |
| 2        | <0.02                     | <0.02                | <0.02               | <0.02          |
| 3        | <0.02                     | <0.02                | <0.02               | <0.02          |
| 4        | <0.02                     | <0.02                | <0.02               | <0.02          |
| 5        | <0.02                     | <0.02                | <0.02               | <0.02          |
| 6        | <0.02                     | <0.02                | <0.02               | <0.02          |
| 7        | <0.02                     | <0.02                | <0.02               | <0.02          |
| 8        | <0.02                     | <0.02                | <0.02               | 0.04           |
| 9        | <0.02                     | <0.02                | <0.02               | 0.06           |
| 10       | <0.02                     | <0.02                | 0.02                | <0.02          |
| 11       | <0.02                     | <0.02                | <0.02               | <0.02          |
| 12       | <0.02                     | <0.02                | <0.02               | <0.02          |
| 13       | <0.02                     | <0.02                | <0.02               | <0.02          |

|    |       |       |       |       |
|----|-------|-------|-------|-------|
| 15 | <0.02 | <0.02 | <0.02 | <0.02 |
| 16 | <0.02 | <0.02 | <0.02 | <0.02 |
| 16 | <0.02 | <0.02 | <0.02 | <0.02 |
| 17 | <0.02 | <0.02 | <0.02 | 0.02  |
| 18 | <0.02 | <0.02 | <0.02 | 0.04  |
| 19 | <0.02 | <0.02 | 0.06  | <0.02 |
| 20 | <0.02 | <0.02 | <0.02 | <0.02 |
| 21 | <0.02 | <0.02 | <0.02 | <0.02 |
| 22 | <0.02 | <0.02 | <0.02 | <0.02 |
| 23 | <0.02 | <0.02 | 0.38  | 0.16  |
| 24 | <0.02 | <0.02 | <0.02 | <0.02 |
| 25 | <0.02 | <0.02 | <0.02 | <0.02 |
| 26 | <0.02 | <0.02 | <0.02 | <0.02 |
| 27 | <0.02 | <0.02 | 0.18  | 0.02  |
| 28 | <0.02 | <0.02 | <0.02 | <0.02 |
| 29 | <0.02 | <0.02 | 0.26  | <0.02 |
| 30 | <0.02 | <0.02 | 0.04  | <0.02 |
| 31 | <0.02 | <0.02 | <0.02 | <0.02 |
| 32 | <0.02 | <0.02 | <0.02 | <0.02 |
| 33 | <0.02 | <0.02 | <0.02 | <0.02 |
| 34 | <0.02 | <0.02 | <0.02 | <0.02 |
| 35 | <0.02 | <0.02 | <0.02 | <0.02 |
| 36 | <0.02 | <0.02 | <0.02 | <0.02 |
| 37 | <0.02 | <0.02 | <0.02 | <0.02 |
| 38 | <0.02 | <0.02 | <0.02 | <0.02 |
| 39 | <0.02 | <0.02 | <0.02 | <0.02 |
| 40 | <0.02 | <0.02 | <0.02 | <0.02 |
| 41 | <0.02 | <0.02 | <0.02 | <0.02 |
| 42 | <0.02 | <0.02 | <0.02 | <0.02 |
| 43 | <0.02 | <0.02 | <0.02 | <0.02 |
| 44 | <0.02 | <0.02 | <0.02 | <0.02 |
| 45 | <0.02 | <0.02 | <0.02 | <0.02 |
| 46 | <0.02 | <0.02 | 0.02  | <0.02 |
| 47 | <0.02 | <0.02 | <0.02 | <0.02 |
| 48 | <0.02 | <0.02 | <0.02 | <0.02 |

SI Table 10: Number of SCNA in 48 primary SBC

| Size        | Amplification  | Deletion      | Total SCNAs    |
|-------------|----------------|---------------|----------------|
| Focal       | 560 (11.66/pt) | 373 (7.96/pt) | 933 (19.43/pt) |
| Large Scale | 45 (0.93/pt)   | 35 (0.75/pt)  | 80 (1.67/pt)   |
| Total       | 605 (12.6/pt)  | 408 (8.5/pt)  | 1013 (21.1/pt) |

SI Table 11: Percentage of SCNA per tumor

| Patient ID | Deletion (%) | Amplification | % Change |
|------------|--------------|---------------|----------|
| 1          | 0.13         | 3.63          | 3.76     |
| 2          | 5.31         | 12.3          | 17.6     |
| 3          | 4.33         | 0.02          | 4.35     |
| 4          | 0.12         | 13.96         | 14.08    |
| 5          | 1.65         | 0.02          | 1.67     |
| 6          | 3.51         | 4.13          | 7.64     |
| 7          | 1.99         | 13.96         | 15.95    |
| 8          | 0            | 0.39          | 0.39     |
| 9          | 1.82         | 20.01         | 21.83    |
| 10         | 1.55         | 0.01          | 1.56     |
| 11         | 1.56         | 0.33          | 1.89     |
| 12         | 1.56         | 0.02          | 1.57     |
| 13         | 5.62         | 13.19         | 18.81    |
| 15         | 1.69         | 2.56          | 4.26     |
| 16         | 5.92         | 14.46         | 20.39    |
| 16         | 4.01         | 8.82          | 12.83    |
| 17         | 1.64         | 1.9           | 3.54     |
| 18         | 1.55         | 0             | 1.56     |
| 19         | 0.01         | 0.01          | 0.02     |
| 20         | 4.01         | 23.39         | 27.41    |
| 21         | 5.33         | 11.8          | 17.14    |
| 21         | 1.55         | 17.47         | 19.02    |
| 23         | 0            | 2.64          | 2.64     |
| 24         | 1.57         | 0             | 1.57     |
| 25         | 0.96         | 3.57          | 4.53     |
| 26         | 1.56         | 0.01          | 1.57     |
| 27         | 0            | 0.09          | 0.09     |
| 28         | 0.01         | 0.01          | 0.02     |
| 29         | 1.56         | 0             | 1.56     |
| 30         | 0.02         | 0             | 0.02     |
| 31         | 0            | 0.15          | 0.15     |
| 32         | 1.55         | 0.02          | 1.57     |
| 33         | 0.09         | 0.01          | 0.1      |
| 34         | 6.59         | 15.44         | 22.03    |
| 35         | 1.64         | 1.37          | 3.01     |
| 36         | 0.02         | 3.08          | 3.1      |
| 37         | 1.57         | 0.1           | 1.67     |
| 38         | 0.03         | 0.02          | 0.05     |
| 39         | 0.11         | 0             | 0.11     |
| 40         | 0.09         | 0             | 0.09     |
| 41         | 0            | 0.21          | 0.21     |

|      |       |       |       |
|------|-------|-------|-------|
| 42   | 0.01  | 0.21  | 0.22  |
| 43   | 1.55  | 0.01  | 1.56  |
| 44   | 13.12 | 0.13  | 13.25 |
| 45   | 8.57  | 19.44 | 28.01 |
| 46   | 0.01  | 0     | 0.01  |
| 47   | 12.84 | 0.04  | 12.88 |
| 48   | 0.14  | 0     | 0.15  |
| Mean | 2.26  | 4.35  | 6.61  |

Supplemental Table 12: 1013 Somatic Copy Number Variations (SCNA) in 48 SI-NET

| Pt-ID | chr | start     | end       | exons | m.log2  | eventsize | call | pval     |
|-------|-----|-----------|-----------|-------|---------|-----------|------|----------|
| 1     | 11  | 89704400  | 89705364  | 2     | -2.4028 | 964       | del  | 6.22E-37 |
| 1     | 14  | 35872895  | 35873623  | 2     | 1.8412  | 728       | amp  | 2.11E-42 |
| 1     | 19  | 39055598  | 39058412  | 3     | 2.4338  | 2814      | amp  | 5.92E-23 |
| 1     | 19  | 14016871  | 14016955  | 2     | 2.4746  | 84        | amp  | 9.13E-15 |
| 1     | 19  | 55592598  | 55593821  | 5     | 1.5751  | 1223      | amp  | 1.32E-12 |
| 1     | 20  | 68350     | 62904573  | 5083  | 0.2897  | 62836223  | amp  | NA       |
| 1     | 21  | 9907193   | 48084206  | 2114  | 0.2561  | 38177013  | amp  | NA       |
| 1     | 4   | 48271768  | 48343612  | 2     | 2.3986  | 71844     | amp  | 7.58E-20 |
| 1     | 6   | 168720067 | 168841830 | 2     | 1.8285  | 121763    | amp  | 4.38E-09 |
| 1     | 7   | 75831215  | 75889223  | 4     | -1.4094 | 58008     | del  | 8.31E-17 |
| 1     | Y   | 2846850   | 23562808  | 9     | -0.5075 | 20715958  | del  | NA       |
| 2     | 1   | 14362     | 69090     | 8     | 0.6177  | 54728     | amp  | 0        |
| 2     | 10  | 12084753  | 12110933  | 3     | 1.1674  | 26180     | amp  | 1.03E-14 |
| 2     | 10  | 47751144  | 47945323  | 20    | 1.0394  | 194179    | amp  | 4.96E-35 |
| 2     | 10  | 92827     | 12077057  | 562   | 0.3847  | 11984230  | amp  | 1.52E-05 |
| 2     | 10  | 12123470  | 27366561  | 847   | 0.3379  | 15243091  | amp  | 3.43E-16 |
| 2     | 10  | 27375467  | 47746919  | 772   | 0.357   | 20371452  | amp  | 3.04E-29 |
| 2     | 10  | 47946808  | 73912626  | 1247  | 0.3907  | 25965818  | amp  | 1.43E-31 |
| 2     | 10  | 73983645  | 135440068 | 4735  | 0.3715  | 61456423  | amp  | NA       |
| 2     | 11  | 134253573 | 134257441 | 2     | -0.5167 | 3868      | del  | NA       |
| 2     | 11  | 88780379  | 134252603 | 3114  | -1.1747 | 45472224  | del  | 4.65E-07 |
| 2     | 12  | 49091920  | 49094795  | 3     | -0.6956 | 2875      | del  | 5.08E-27 |
| 2     | 12  | 87983     | 90795     | 7     | 0.7954  | 2812      | amp  | 1.71E-13 |
| 2     | 13  | 52992126  | 53030657  | 13    | -0.6271 | 38531     | del  | 5.39E-11 |
| 2     | 16  | 89767337  | 89768035  | 2     | 2.079   | 698       | amp  | 1.65E-22 |
| 2     | 17  | 40876322  | 40912652  | 9     | -0.6505 | 36330     | del  | 1.24E-13 |
| 2     | 17  | 37587367  | 37650776  | 14    | -0.511  | 63409     | del  | 2.14E-09 |
| 2     | 18  | 163307    | 78005159  | 3102  | -0.6637 | 77841852  | del  | NA       |
| 2     | 19  | 46120887  | 46142614  | 13    | -0.4962 | 21727     | del  | 6.37E-18 |
| 2     | 19  | 632833    | 639925    | 3     | -1.0977 | 7092      | del  | 4.92E-09 |
| 2     | 2   | 178199120 | 178284996 | 4     | -0.6814 | 85876     | del  | 2.85E-46 |
| 2     | 2   | 173600524 | 173600853 | 2     | -1.6486 | 329       | del  | 4.69E-17 |

| Pt-ID | chr | start     | end       | exons | m.log2  | eventsiz | call | pval      |
|-------|-----|-----------|-----------|-------|---------|----------|------|-----------|
| 2     | 20  | 68350     | 62904573  | 5120  | 0.3175  | 62836223 | amp  | NA        |
| 2     | 22  | 16256331  | 51237082  | 4306  | -0.2541 | 34980751 | del  | NA        |
| 2     | 3   | 53880109  | 53880576  | 2     | -1.6669 | 467      | del  | 1.34E-17  |
| 2     | 3   | 125223466 | 125271024 | 7     | -0.5412 | 47558    | del  | 1.26E-15  |
| 2     | 3   | 109012635 | 109031391 | 7     | -0.5227 | 18756    | del  | 3.33E-06  |
| 2     | 4   | 128982502 | 128996088 | 3     | -1.1582 | 13586    | del  | 2.06E-14  |
| 2     | 5   | 94955979  | 94982480  | 2     | 1.3472  | 26501    | amp  | 9.81E-08  |
| 2     | 5   | 94982582  | 180687001 | 4944  | 0.4715  | 85704419 | amp  | NA        |
| 2     | 5   | 140372    | 94938940  | 3897  | 0.4842  | 94798568 | amp  | 5.32E-13  |
| 2     | 7   | 75864345  | 75889434  | 4     | -1.0923 | 25089    | del  | 2.07E-15  |
| 2     | 7   | 8301629   | 8301723   | 2     | 1.6011  | 94       | amp  | 5.44E-08  |
| 2     | 7   | 192968    | 8275539   | 793   | 0.4472  | 8082571  | amp  | 1.43E-08  |
| 2     | 7   | 8302069   | 44621645  | 1684  | 0.567   | 36319576 | amp  | 0         |
| 2     | 8   | 12002931  | 12008505  | 2     | -1.9594 | 5574     | del  | 2.47E-24  |
| 2     | 8   | 145690735 | 145690953 | 2     | 1.4046  | 218      | amp  | 2.69E-07  |
| 2     | X   | 123019480 | 123095555 | 8     | -0.6769 | 76075    | del  | 3.91E-08  |
| 3     | 1   | 27961575  | 27994968  | 4     | 1.4984  | 33393    | amp  | 1.01E-52  |
| 3     | 1   | 6479666   | 6479835   | 2     | 2.8706  | 169      | amp  | 1.49E-48  |
| 3     | 1   | 161102180 | 161102340 | 2     | 1.4745  | 160      | amp  | 4.53E-15  |
| 3     | 10  | 47929794  | 47946808  | 4     | -1.0133 | 17014    | del  | 3.81E-12  |
| 3     | 11  | 842413    | 842940    | 3     | 1.2448  | 527      | amp  | 7.32E-37  |
| 3     | 11  | 73087404  | 73100156  | 3     | 1.1799  | 12752    | amp  | 2.31E-13  |
| 3     | 12  | 52684880  | 52695648  | 2     | 1.1129  | 10768    | amp  | 1.78E-74  |
| 3     | 12  | 98909441  | 98909924  | 2     | 1.1683  | 483      | amp  | 2.71E-26  |
| 3     | 12  | 87983     | 90795     | 7     | -0.5418 | 2812     | del  | 1.69E-23  |
| 3     | 16  | 824835    | 825140    | 2     | 1.7536  | 305      | amp  | 1.48E-19  |
| 3     | 16  | 53859775  | 90142249  | 3492  | -0.597  | 36282474 | del  | NA        |
| 3     | 17  | 76355830  | 76374734  | 2     | 1.6107  | 18904    | amp  | 5.24E-11  |
| 3     | 18  | 163307    | 78005159  | 3106  | -0.7185 | 77841852 | del  | NA        |
| 3     | 19  | 8649778   | 8650339   | 3     | 1.792   | 561      | amp  | 6.52E-19  |
| 3     | 21  | 40684766  | 40685368  | 3     | 1.4943  | 602      | amp  | 1.95E-15  |
| 3     | 4   | 185570548 | 185570766 | 2     | 1.262   | 218      | amp  | 3.19E-13  |
| 3     | 5   | 118323988 | 118407083 | 2     | 1.3519  | 83095    | amp  | 1.83E-19  |
| 3     | 5   | 79864778  | 79865972  | 2     | 1.2176  | 1194     | amp  | 3.77E-11  |
| 3     | 7   | 75864345  | 75889434  | 4     | 1.3151  | 25089    | amp  | 8.68E-28  |
| 3     | 8   | 146017629 | 146024260 | 2     | 1.7197  | 6631     | amp  | 4.25E-16  |
| 3     | 9   | 132427919 | 132481509 | 2     | 1.9891  | 53590    | amp  | 2.81E-16  |
| 3     | 9   | 70993114  | 72047451  | 73    | -0.6897 | 1054337  | del  | 3.96E-107 |
| 3     | 9   | 14510     | 39456879  | 1995  | -0.682  | 39442369 | del  | 2.63E-59  |
| 4     | 1   | 21616856  | 21671868  | 2     | -1.8091 | 55012    | del  | 5.97E-139 |
| 4     | 11  | 113930430 | 113931287 | 2     | -1.9099 | 857      | del  | 9.74E-19  |
| 4     | 11  | 6440214   | 6440575   | 2     | -1.7331 | 361      | del  | 5.05E-16  |
| 4     | 11  | 17035535  | 17035671  | 2     | -1.8643 | 136      | del  | 2.00E-15  |
| 4     | 11  | 441920    | 450279    | 2     | 1.3053  | 8359     | amp  | 5.60E-15  |
| 4     | 14  | 50154853  | 50159884  | 2     | -1.2557 | 5031     | del  | 8.95E-24  |
| 4     | 14  | 19377593  | 50150310  | 1840  | 0.4219  | 30772717 | amp  | 1.50E-16  |



| Pt-ID | chr | start     | end       | exons | m.log2  | eventsized | call | pval      |
|-------|-----|-----------|-----------|-------|---------|------------|------|-----------|
| 4     | 14  | 50175876  | 106950170 | 4314  | 0.3994  | 56774294   | amp  | NA        |
| 4     | 15  | 78423506  | 78441718  | 2     | -2.4406 | 18212      | del  | 1.25E-25  |
| 4     | 15  | 27017827  | 27018791  | 2     | -2.1016 | 964        | del  | 2.26E-20  |
| 4     | 15  | 74725930  | 74726081  | 2     | 1.8053  | 151        | amp  | 3.39E-20  |
| 4     | 18  | 12308256  | 12308685  | 2     | -1.7797 | 429        | del  | 2.00E-14  |
| 4     | 19  | 901975    | 932417    | 8     | -1.4407 | 30442      | del  | 1.93E-17  |
| 4     | 19  | 8649778   | 8650339   | 3     | -1.5038 | 561        | del  | 7.38E-11  |
| 4     | 19  | 110678    | 901421    | 198   | -0.3296 | 790743     | del  | 2.30E-08  |
| 4     | 2   | 27434887  | 27435175  | 2     | -2.2547 | 288        | del  | 6.93E-23  |
| 4     | 2   | 98158373  | 98158541  | 2     | 2.048   | 168        | amp  | 1.13E-21  |
| 4     | 2   | 98154630  | 98154797  | 2     | -1.9742 | 167        | del  | 5.52E-13  |
| 4     | 20  | 3641172   | 3641590   | 2     | -1.7882 | 418        | del  | 4.10E-22  |
| 4     | 20  | 68350     | 3640804   | 479   | 0.3218  | 3572454    | amp  | 7.60E-23  |
| 4     | 20  | 3644000   | 62904573  | 4617  | 0.3189  | 59260573   | amp  | NA        |
| 4     | 21  | 40684997  | 40685368  | 3     | -1.5098 | 371        | del  | 7.53E-13  |
| 4     | 22  | 50354772  | 50354965  | 2     | -4.3091 | 193        | del  | 5.19E-73  |
| 4     | 4   | 53226     | 190947538 | 7842  | 0.3628  | 190894312  | amp  | NA        |
| 4     | 5   | 140372    | 180687001 | 8828  | 0.3525  | 180546629  | amp  | NA        |
| 4     | 7   | 74221274  | 74225429  | 2     | -1.7331 | 4155       | del  | 9.60E-13  |
| 4     | 8   | 42396717  | 42397068  | 2     | -2.2449 | 351        | del  | 2.81E-39  |
| 5     | 10  | 134755483 | 134902211 | 3     | 1.7391  | 146728     | amp  | 4.08E-07  |
| 5     | 16  | 23159958  | 23194039  | 2     | -2.3302 | 34081      | del  | 1.08E-227 |
| 5     | 16  | 204270    | 215972    | 2     | 2.4274  | 11702      | amp  | 1.38E-09  |
| 5     | 16  | 96999     | 114896    | 25    | 0.2948  | 17897      | amp  | 6.79E-07  |
| 5     | 16  | 127017    | 129423    | 3     | 1.363   | 2406       | amp  | 2.99E-05  |
| 5     | 18  | 43405544  | 43417477  | 2     | -2.4722 | 11933      | del  | 1.89E-12  |
| 5     | 18  | 43418682  | 78005159  | 1274  | -0.2787 | 34586477   | del  | NA        |
| 5     | 18  | 163307    | 43329742  | 1810  | -0.2859 | 43166435   | del  | 1.73E-11  |
| 5     | 19  | 19638815  | 19639719  | 2     | -2.6987 | 904        | del  | 2.90E-11  |
| 5     | 21  | 40684766  | 40684997  | 2     | -1.8799 | 231        | del  | 2.96E-07  |
| 5     | 21  | 45706439  | 45709870  | 6     | 1.2938  | 3431       | amp  | 6.59E-07  |
| 5     | 3   | 44903379  | 44903473  | 2     | -2.1562 | 94         | del  | 8.05E-12  |
| 5     | 7   | 98030113  | 98246596  | 2     | -2.5875 | 216483     | del  | 6.68E-15  |
| 5     | Y   | 4900710   | 21152525  | 5     | -0.3117 | 16251815   | del  | NA        |
| 6     | 10  | 103874162 | 103892786 | 3     | 1.5614  | 18624      | amp  | 1.88E-21  |
| 6     | 10  | 51827683  | 51827864  | 2     | 1.6753  | 181        | amp  | 1.46E-15  |
| 6     | 10  | 93392712  | 93558150  | 2     | 1.8738  | 165438     | amp  | 5.52E-14  |
| 6     | 11  | 17035535  | 17035671  | 2     | 1.9176  | 136        | amp  | 1.08E-32  |
| 6     | 11  | 110582849 | 110583358 | 2     | 1.6801  | 509        | amp  | 3.27E-15  |
| 6     | 12  | 56321508  | 56325811  | 3     | 1.2279  | 4303       | amp  | 1.61E-25  |
| 6     | 12  | 42877177  | 42983266  | 3     | 1.5177  | 106089     | amp  | 1.15E-12  |
| 6     | 13  | 53073177  | 53151205  | 11    | -1.1167 | 78028      | del  | 6.87E-13  |
| 6     | 13  | 19408542  | 53064243  | 2092  | -0.4233 | 33655701   | del  | 3.21E-11  |
| 6     | 13  | 53153478  | 115089262 | 1544  | -0.3823 | 61935784   | del  | NA        |
| 6     | 16  | 2228129   | 2228902   | 2     | 2.5586  | 773        | amp  | 4.60E-21  |
| 6     | 16  | 46864995  | 46918605  | 3     | 1.5379  | 53610      | amp  | 4.90E-15  |

| Pt-ID | chr | start     | end       | exons | m.log2  | eventsized | call | pval      |
|-------|-----|-----------|-----------|-------|---------|------------|------|-----------|
| 6     | 16  | 57481253  | 57481401  | 2     | 1.6913  | 148        | amp  | 1.69E-14  |
| 6     | 16  | 4466459   | 4475857   | 2     | 1.5891  | 9398       | amp  | 5.60E-11  |
| 6     | 17  | 15902781  | 15903006  | 2     | 2.7585  | 225        | amp  | 4.22E-48  |
| 6     | 17  | 1552493   | 1552705   | 2     | 2.5006  | 212        | amp  | 1.09E-28  |
| 6     | 18  | 163307    | 78005159  | 3105  | -0.414  | 77841852   | del  | NA        |
| 6     | 19  | 18899218  | 18899647  | 3     | 1.4504  | 429        | amp  | 1.25E-09  |
| 6     | 2   | 198649779 | 198669425 | 3     | 1.0579  | 19646      | amp  | 1.10E-30  |
| 6     | 2   | 73492409  | 73612885  | 8     | 0.7592  | 120476     | amp  | 3.90E-25  |
| 6     | 2   | 174828488 | 174829892 | 2     | 1.202   | 1404       | amp  | 5.93E-12  |
| 6     | 20  | 3026674   | 3063202   | 8     | 1.3061  | 36528      | amp  | 8.08E-33  |
| 6     | 20  | 68350     | 3026331   | 358   | 0.2941  | 2957981    | amp  | 2.02E-15  |
| 6     | 20  | 3063622   | 62904573  | 4742  | 0.263   | 59840951   | amp  | NA        |
| 6     | 21  | 9907193   | 48084206  | 2129  | 0.2519  | 38177013   | amp  | NA        |
| 6     | 3   | 44903379  | 44903473  | 2     | 1.522   | 94         | amp  | 7.70E-45  |
| 6     | 5   | 171881281 | 172096787 | 3     | 2.3204  | 215506     | amp  | 1.27E-20  |
| 6     | 5   | 172110421 | 180687001 | 955   | 0.3062  | 8576580    | amp  | NA        |
| 6     | 6   | 35108981  | 35182189  | 2     | 2.1621  | 73208      | amp  | 2.64E-26  |
| 6     | 9   | 140008694 | 140008914 | 2     | 2.1698  | 220        | amp  | 1.03E-14  |
| 6     | Y   | 2654895   | 26980088  | 284   | -0.9026 | 24325193   | del  | NA        |
| 7     | 11  | 73087404  | 73087712  | 2     | 1.8782  | 308        | amp  | 1.14E-191 |
| 7     | 11  | 69588791  | 69589512  | 2     | -1.8123 | 721        | del  | 2.43E-11  |
| 7     | 11  | 73100156  | 134281700 | 3965  | -0.4511 | 61181544   | del  | NA        |
| 7     | 12  | 53613733  | 53621145  | 2     | 1.5857  | 7412       | amp  | 4.25E-13  |
| 7     | 14  | 89029252  | 89029690  | 2     | 2.0857  | 438        | amp  | 2.28E-11  |
| 7     | 14  | 89029994  | 106950170 | 1714  | 0.3538  | 17920176   | amp  | NA        |
| 7     | 14  | 19377593  | 89016581  | 4448  | 0.3486  | 69638988   | amp  | 5.96E-14  |
| 7     | 15  | 27017827  | 27018791  | 2     | 1.7562  | 964        | amp  | 7.88E-13  |
| 7     | 17  | 26684313  | 26684686  | 2     | 2.0857  | 373        | amp  | 1.54E-15  |
| 7     | 2   | 88926484  | 88991175  | 2     | -2.0989 | 64691      | del  | 2.04E-18  |
| 7     | 20  | 3641172   | 3641401   | 2     | 2.6544  | 229        | amp  | 1.92E-19  |
| 7     | 20  | 68350     | 3640804   | 478   | 0.346   | 3572454    | amp  | 1.25E-20  |
| 7     | 20  | 3644000   | 62904573  | 4625  | 0.3548  | 59260573   | amp  | NA        |
| 7     | 22  | 50354772  | 50354965  | 2     | -2.0287 | 193        | del  | 5.54E-09  |
| 7     | 4   | 53226     | 190947538 | 7844  | 0.402   | 190894312  | amp  | NA        |
| 7     | 5   | 140372    | 180687001 | 8816  | 0.3881  | 180546629  | amp  | NA        |
| 7     | 8   | 145690735 | 145692341 | 5     | -1.2999 | 1606       | del  | 3.92E-11  |
| 8     | 16  | 96999     | 90142249  | 8416  | 0.2739  | 90045250   | amp  | NA        |
| 8     | 1   | 156215572 | 156217705 | 3     | 0.8584  | 2133       | amp  | 3.98E-115 |
| 8     | 1   | 42800729  | 42846467  | 2     | 2.6869  | 45738      | amp  | 3.44E-33  |
| 8     | 1   | 94147153  | 94312387  | 2     | 1.9403  | 165234     | amp  | 1.07E-18  |
| 8     | 10  | 72142304  | 72163860  | 2     | 2.0184  | 21556      | amp  | 8.77E-25  |
| 8     | 12  | 68042511  | 68043576  | 2     | 1.6796  | 1065       | amp  | 1.88E-29  |
| 8     | 15  | 43028499  | 43029210  | 2     | 1.4051  | 711        | amp  | 9.45E-101 |
| 8     | 18  | 12308256  | 12308685  | 2     | 1.6869  | 429        | amp  | 4.69E-15  |
| 8     | 19  | 2235921   | 2236153   | 2     | 3.0802  | 232        | amp  | 9.19E-29  |
| 8     | 19  | 39989831  | 39993454  | 3     | 1.6633  | 3623       | amp  | 8.71E-13  |

| Pt-ID | chr | start     | end       | exons | m.log2  | eventsize | call | pval      |
|-------|-----|-----------|-----------|-------|---------|-----------|------|-----------|
| 8     | 19  | 29703811  | 30020725  | 5     | 0.8696  | 316914    | amp  | 1.06E-05  |
| 8     | 19  | 110678    | 2235760   | 713   | 0.2701  | 2125082   | amp  | 4.88E-22  |
| 8     | 2   | 152954843 | 152955462 | 3     | 1.1598  | 619       | amp  | 9.57E-78  |
| 8     | 2   | 20850791  | 20870223  | 3     | 1.3405  | 19432     | amp  | 4.18E-26  |
| 8     | 2   | 39664032  | 39893092  | 2     | 2.8391  | 229060    | amp  | 7.84E-177 |
| 8     | 20  | 18037300  | 18118498  | 3     | 2.2705  | 81198     | amp  | 1.28E-51  |
| 8     | 5   | 136834061 | 136834867 | 2     | 1.8333  | 806       | amp  | 3.74E-13  |
| 8     | 6   | 144329541 | 144471653 | 4     | 1.4718  | 142112    | amp  | 3.25E-20  |
| 8     | 7   | 102106263 | 102112900 | 12    | 0.4481  | 6637      | amp  | 1.98E-21  |
| 8     | 7   | 102105160 | 102105389 | 2     | 1.8374  | 229       | amp  | 3.78E-05  |
| 8     | 8   | 48873493  | 48873690  | 2     | 3.1038  | 197       | amp  | 6.73E-155 |
| 8     | 8   | 42751396  | 42752032  | 2     | 1.5809  | 636       | amp  | 1.64E-15  |
| 8     | 9   | 132404165 | 132427919 | 2     | 2.0437  | 23754     | amp  | 1.48E-14  |
| 9     | 10  | 76994817  | 76995024  | 2     | 3.2168  | 207       | amp  | 1.97E-21  |
| 9     | 10  | 76995373  | 135440068 | 4296  | 0.3011  | 58444695  | amp  | NA        |
| 9     | 10  | 92827     | 76994695  | 3858  | 0.2711  | 76901868  | amp  | 2.49E-21  |
| 9     | 11  | 46354738  | 46389201  | 6     | 1.2476  | 34463     | amp  | 6.32E-11  |
| 9     | 12  | 111020613 | 111051879 | 2     | 2.4683  | 31266     | amp  | 1.25E-16  |
| 9     | 12  | 111057640 | 133778729 | 2293  | 0.2615  | 22721089  | amp  | NA        |
| 9     | 12  | 87983     | 110989593 | 8941  | 0.2569  | 110901610 | amp  | 8.07E-14  |
| 9     | 13  | 19408542  | 115089262 | 3623  | -0.6517 | 95680720  | del  | NA        |
| 9     | 15  | 45403308  | 45403581  | 2     | 2.6902  | 273       | amp  | 3.33E-18  |
| 9     | 15  | 102501015 | 102516335 | 10    | 1.0996  | 15320     | amp  | NA        |
| 9     | 16  | 30199512  | 30200004  | 3     | 2.1542  | 492       | amp  | 7.46E-17  |
| 9     | 16  | 57481253  | 57481401  | 2     | 2.5524  | 148       | amp  | 6.67E-15  |
| 9     | 16  | 67188998  | 67199621  | 10    | 1.1011  | 10623     | amp  | 5.18E-13  |
| 9     | 17  | 73611583  | 73611773  | 2     | 2.4119  | 190       | amp  | 2.03E-09  |
| 9     | 2   | 219264477 | 219267071 | 4     | 1.4226  | 2594      | amp  | 5.65E-08  |
| 9     | 21  | 9907193   | 48084206  | 2122  | 0.2813  | 38177013  | amp  | NA        |
| 9     | 3   | 154797435 | 154797704 | 2     | 2.2336  | 269       | amp  | 1.11E-13  |
| 9     | 5   | 140372    | 180687001 | 8783  | 0.3219  | 180546629 | amp  | NA        |
| 9     | 7   | 192968    | 158935137 | 9512  | 0.6259  | 158742169 | amp  | NA        |
| 9     | 9   | 14510     | 123385    | 13    | 0.7919  | 108875    | amp  | 1.59E-27  |
| 11    | 1   | 24287418  | 24292938  | 3     | -1.4664 | 5520      | del  | 8.75E-34  |
| 11    | 1   | 1238301   | 1244465   | 6     | 1.5252  | 6164      | amp  | 1.52E-21  |
| 11    | 1   | 14362     | 1237367   | 225   | 0.3067  | 1223005   | amp  | 2.48E-11  |
| 11    | 11  | 65306182  | 65307483  | 5     | 1.3166  | 1301      | amp  | 2.78E-61  |
| 11    | 11  | 124669766 | 124738697 | 3     | 1.4339  | 68931     | amp  | 2.70E-12  |
| 11    | 15  | 76630592  | 76633474  | 3     | 1.439   | 2882      | amp  | 8.60E-11  |
| 11    | 16  | 838621    | 839209    | 3     | 1.9049  | 588       | amp  | 9.79E-45  |
| 11    | 16  | 755680    | 765172    | 2     | -2.8708 | 9492      | del  | 9.11E-37  |
| 11    | 16  | 67354491  | 67360746  | 2     | -1.4913 | 6255      | del  | 1.15E-22  |
| 11    | 16  | 50099880  | 50100277  | 2     | 1.9045  | 397       | amp  | 7.31E-12  |
| 11    | 16  | 765583    | 837555    | 75    | 0.3555  | 71972     | amp  | 8.23E-12  |
| 11    | 16  | 96999     | 746772    | 309   | 0.2769  | 649773    | amp  | 1.15E-29  |
| 11    | 18  | 163307    | 78005159  | 3096  | -0.605  | 77841852  | del  | NA        |

| Pt-ID | chr | start     | end       | exons | m.log2  | eventsize | call | pval      |
|-------|-----|-----------|-----------|-------|---------|-----------|------|-----------|
| 11    | 21  | 9907193   | 9968515   | 2     | 0.7462  | 61322     | amp  | 3.29E-41  |
| 11    | 3   | 134369666 | 134514259 | 2     | 1.6808  | 144593    | amp  | 2.29E-12  |
| 11    | 3   | 195488957 | 195490915 | 4     | 1.1185  | 1958      | amp  | 7.90E-08  |
| 11    | 7   | 6785718   | 6786666   | 2     | -2.6633 | 948       | del  | 2.29E-47  |
| 11    | 7   | 8301629   | 8301723   | 2     | 2.1178  | 94        | amp  | 6.58E-19  |
| 11    | 7   | 105752585 | 105752924 | 2     | 1.1938  | 339       | amp  | 7.76E-19  |
| 11    | 7   | 30721530  | 30791750  | 3     | 1.3494  | 70220     | amp  | 3.29E-09  |
| 11    | 9   | 133799130 | 133814389 | 4     | 1.5608  | 15259     | amp  | 8.80E-14  |
| 12    | 10  | 47911048  | 47929794  | 4     | -1.4263 | 18746     | del  | 7.06E-17  |
| 12    | 11  | 64008412  | 64008603  | 2     | 2.1325  | 191       | amp  | 1.93E-59  |
| 12    | 15  | 74725930  | 74726081  | 2     | 1.8716  | 151       | amp  | 1.69E-11  |
| 12    | 16  | 4743715   | 4743978   | 2     | 2.4757  | 263       | amp  | 5.17E-21  |
| 12    | 16  | 23159958  | 23194039  | 2     | 1.7299  | 34081     | amp  | 1.82E-17  |
| 12    | 16  | 1401379   | 1401693   | 2     | 2.6713  | 314       | amp  | 1.38E-14  |
| 12    | 17  | 1928146   | 1933430   | 2     | 1.9821  | 5284      | amp  | 3.26E-17  |
| 12    | 18  | 163307    | 78005159  | 3098  | -0.6004 | 77841852  | del  | NA        |
| 12    | 2   | 239148301 | 239148465 | 2     | 2.6601  | 164       | amp  | 1.03E-16  |
| 12    | 2   | 203139835 | 203149067 | 5     | -0.9351 | 9232      | del  | 1.71E-10  |
| 12    | 20  | 3686993   | 3722930   | 5     | 0.8643  | 35937     | amp  | 6.33E-38  |
| 12    | 20  | 2732731   | 2733002   | 2     | -2.0008 | 271       | del  | 1.32E-12  |
| 12    | 4   | 53525281  | 53578990  | 3     | 1.7541  | 53709     | amp  | 6.07E-15  |
| 12    | 9   | 130571962 | 130572309 | 2     | 1.5712  | 347       | amp  | 1.96E-20  |
| 12    | 9   | 130159464 | 130160183 | 3     | 1.1274  | 719       | amp  | 9.42E-08  |
| 12    | X   | 118284253 | 118374271 | 3     | 1.6232  | 90018     | amp  | 3.39E-07  |
| 13    | 1   | 45189991  | 45190210  | 2     | -1.3073 | 219       | del  | 6.59E-170 |
| 13    | 1   | 109203584 | 109234931 | 3     | 0.9907  | 31347     | amp  | 1.37E-95  |
| 13    | 1   | 156594392 | 156611739 | 3     | 1.8944  | 17347     | amp  | 9.76E-40  |
| 13    | 1   | 6479666   | 6484847   | 2     | -2.4778 | 5181      | del  | 2.16E-16  |
| 13    | 1   | 28844744  | 28857034  | 2     | 2.3936  | 12290     | amp  | 1.13E-11  |
| 13    | 1   | 229478658 | 229568733 | 7     | 0.6857  | 90075     | amp  | 1.35E-08  |
| 13    | 1   | 32740921  | 32745679  | 8     | 1.1265  | 4758      | amp  | 1.82E-08  |
| 13    | 1   | 14362     | 6479300   | 913   | 0.3942  | 6464938   | amp  | 4.33E-12  |
| 13    | 1   | 6488285   | 28843236  | 3066  | 0.2686  | 22354951  | amp  | 1.34E-09  |
| 13    | 10  | 69583071  | 69644938  | 4     | 0.9233  | 61867     | amp  | 1.27E-25  |
| 13    | 11  | 11906013  | 11977547  | 26    | -0.6543 | 71534     | del  | 3.04E-123 |
| 13    | 12  | 49688908  | 49692070  | 9     | 1.1552  | 3162      | amp  | 2.24E-117 |
| 13    | 12  | 3103903   | 3131009   | 8     | 0.8153  | 27106     | amp  | 9.05E-72  |
| 13    | 12  | 19282647  | 19282984  | 2     | 1.4601  | 337       | amp  | 6.15E-62  |
| 13    | 12  | 49363871  | 49372235  | 4     | 1.148   | 8364      | amp  | 1.39E-08  |
| 13    | 14  | 93581413  | 93651154  | 4     | 1.5992  | 69741     | amp  | 1.68E-32  |
| 13    | 14  | 73706480  | 73712343  | 3     | 1.7481  | 5863      | amp  | 5.20E-21  |
| 13    | 14  | 67862118  | 67981802  | 6     | 1.0297  | 119684    | amp  | 1.86E-07  |
| 13    | 15  | 72581208  | 72581967  | 4     | 1.3691  | 759       | amp  | 1.24E-16  |
| 13    | 16  | 29690440  | 29708519  | 4     | 2.2822  | 18079     | amp  | 2.64E-34  |
| 13    | 16  | 96999     | 29675015  | 3684  | 0.3246  | 29578016  | amp  | 5.82E-58  |
| 13    | 17  | 3970456   | 3975901   | 3     | -0.6631 | 5445      | del  | 1.19E-41  |

| Pt-ID | chr | start     | end       | exons | m.log2  | eventsized | call | pval        |
|-------|-----|-----------|-----------|-------|---------|------------|------|-------------|
| 13    | 17  | 73178908  | 73201596  | 2     | 3.0958  | 22688      | amp  | 3.15E-14    |
| 13    | 17  | 79623522  | 79634758  | 5     | 1.7856  | 11236      | amp  | 2.59E-08    |
| 13    | 17  | 79637254  | 81187692  | 436   | 0.434   | 1550438    | amp  | NA          |
| 13    | 17  | 6010      | 3969740   | 684   | 0.3723  | 3963730    | amp  | 0.008769194 |
| 13    | 17  | 73204621  | 79620189  | 1385  | 0.4057  | 6415568    | amp  | 4.01E-09    |
| 13    | 18  | 46066128  | 46190122  | 4     | 0.7577  | 123994     | amp  | 2.34E-45    |
| 13    | 18  | 46190817  | 78005159  | 1067  | -0.4789 | 31814342   | del  | NA          |
| 13    | 18  | 163307    | 46065426  | 2004  | -0.4209 | 45902119   | del  | 1.84E-29    |
| 13    | 19  | 29703811  | 30017490  | 2     | 2.6072  | 313679     | amp  | 1.22E-14    |
| 13    | 19  | 30018117  | 59092611  | 6103  | 0.4087  | 29074494   | amp  | NA          |
| 13    | 19  | 110678    | 29698166  | 5426  | 0.5008  | 29587488   | amp  | 3.51E-26    |
| 13    | 2   | 26533559  | 26536627  | 4     | 0.6413  | 3068       | amp  | 2.90E-292   |
| 13    | 2   | 231729620 | 231742114 | 5     | 0.6329  | 12494      | amp  | 1.33E-12    |
| 13    | 2   | 231742722 | 243102106 | 1104  | -0.2774 | 11359384   | del  | NA          |
| 13    | 20  | 3653183   | 3653367   | 2     | 2.8401  | 184        | amp  | 1.71E-162   |
| 13    | 22  | 25960860  | 26074782  | 9     | -0.6382 | 113922     | del  | 2.87E-11    |
| 13    | 22  | 16256331  | 25777347  | 1182  | 0.3164  | 9521016    | amp  | 1.14E-08    |
| 13    | 22  | 26081136  | 51237082  | 3070  | 0.2901  | 25155946   | amp  | NA          |
| 13    | 3   | 124303505 | 124351266 | 2     | 1.353   | 47761      | amp  | 3.93E-83    |
| 13    | 3   | 154797435 | 154797704 | 2     | 1.9487  | 269        | amp  | 1.22E-79    |
| 13    | 5   | 37370767  | 37381703  | 5     | 0.8344  | 10936      | amp  | 7.17E-72    |
| 13    | 5   | 137589745 | 137595245 | 3     | 1.5403  | 5500       | amp  | 1.81E-52    |
| 13    | 6   | 83902897  | 83903031  | 2     | 1.9259  | 134        | amp  | 6.55E-33    |
| 13    | X   | 48979896  | 49019180  | 2     | 2.1423  | 39284      | amp  | 3.07E-75    |
| 13    | X   | 2700106   | 48978971  | 2149  | -0.3877 | 46278865   | del  | 4.14E-52    |
| 13    | X   | 49020120  | 154842452 | 4640  | -0.4549 | 105822332  | del  | NA          |
| 13    | Y   | 4900710   | 21152525  | 12    | -1.0382 | 16251815   | del  | NA          |
| 14    | 11  | 57335057  | 57335321  | 2     | 2.2913  | 264        | amp  | 1.36E-09    |
| 14    | 11  | 126987    | 57327809  | 4036  | 0.2623  | 57200822   | amp  | 3.43E-59    |
| 14    | 14  | 103987599 | 103996286 | 5     | 2.4751  | 8687       | amp  | 1.45E-08    |
| 14    | 14  | 103998918 | 106950170 | 355   | 0.7003  | 2951252    | amp  | NA          |
| 14    | 14  | 19377593  | 103986805 | 5767  | 0.3945  | 84609212   | amp  | 1.07E-18    |
| 14    | 17  | 79917346  | 79918462  | 3     | 2.4982  | 1116       | amp  | 1.33E-10    |
| 14    | 18  | 19284464  | 19321544  | 2     | 2.8176  | 37080      | amp  | 4.55E-14    |
| 14    | 19  | 1979161   | 1979317   | 2     | 3.9399  | 156        | amp  | 2.90E-21    |
| 14    | 19  | 110678    | 1978857   | 595   | 0.2552  | 1868179    | amp  | 1.68E-12    |
| 14    | 20  | 62369173  | 62369325  | 2     | 4.0776  | 152        | amp  | 6.71E-20    |
| 14    | 20  | 3026331   | 3063622   | 10    | 1.6086  | 37291      | amp  | 8.08E-15    |
| 14    | 20  | 62369535  | 62904573  | 144   | 0.5869  | 535038     | amp  | NA          |
| 14    | 20  | 68350     | 3025324   | 355   | 0.5032  | 2956974    | amp  | 9.34E-12    |
| 14    | 20  | 3065200   | 62368885  | 4558  | 0.5032  | 59303685   | amp  | 2.97E-21    |
| 14    | 21  | 35013986  | 35014783  | 2     | 3.2934  | 797        | amp  | 3.62E-14    |
| 14    | 21  | 35091101  | 48084206  | 1387  | 0.3343  | 12993105   | amp  | NA          |
| 14    | 3   | 145939851 | 145968746 | 4     | 1.649   | 28895      | amp  | 9.38E-11    |
| 14    | 3   | 128712822 | 128749545 | 3     | 1.5952  | 36723      | amp  | 2.72E-06    |
| 14    | 5   | 114880219 | 114937793 | 2     | 2.9208  | 57574      | amp  | 4.29E-12    |

| Pt-ID | chr | start     | end       | exons | m.log2  | eventsized | call | pval      |
|-------|-----|-----------|-----------|-------|---------|------------|------|-----------|
| 14    | 6   | 135818720 | 135818938 | 2     | 3.2726  | 218        | amp  | 4.73E-20  |
| 14    | 9   | 14510     | 141111400 | 7948  | -0.3856 | 141096890  | del  | NA        |
| 14    | Y   | 2654895   | 26980088  | 284   | 0.392   | 24325193   | amp  | NA        |
| 15    | 13  | 113862912 | 113863085 | 2     | 2.2855  | 173        | amp  | 2.09E-11  |
| 15    | 14  | 77818015  | 77843278  | 2     | 1.6509  | 25263      | amp  | 1.95E-32  |
| 15    | 14  | 77607945  | 77648101  | 2     | 2.2889  | 40156      | amp  | 1.08E-14  |
| 15    | 18  | 163307    | 78005159  | 3090  | -0.2906 | 77841852   | del  | NA        |
| 15    | 2   | 97914880  | 97915880  | 2     | -2.2215 | 1000       | del  | 6.76E-41  |
| 15    | 20  | 68350     | 62904573  | 5083  | 0.2614  | 62836223   | amp  | NA        |
| 15    | 6   | 170598599 | 170615843 | 3     | 2.0661  | 17244      | amp  | 5.50E-15  |
| 15    | 7   | 1538610   | 1538890   | 2     | 2.6979  | 280        | amp  | 5.42E-30  |
| 15    | 7   | 101459291 | 101460881 | 2     | 2.4521  | 1590       | amp  | 2.43E-14  |
| 15    | 7   | 105029094 | 105029237 | 2     | 1.5887  | 143        | amp  | 4.32E-09  |
| 15    | 9   | 140082867 | 140083057 | 2     | 2.2129  | 190        | amp  | 3.10E-08  |
| 15    | X   | 118284253 | 118374271 | 3     | 2.1387  | 90018      | amp  | 5.80E-13  |
| 15    | Y   | 2654895   | 24460639  | 281   | -1.3704 | 21805744   | del  | NA        |
| 16    | 1   | 1509857   | 1550883   | 2     | 3.2897  | 41026      | amp  | 0         |
| 16    | 1   | 114445259 | 114448037 | 4     | 0.542   | 2778       | amp  | 2.62E-169 |
| 16    | 1   | 84464613  | 84543744  | 2     | 1.3598  | 79131      | amp  | 8.69E-67  |
| 16    | 1   | 112281807 | 112298419 | 3     | 1.0263  | 16612      | amp  | 6.67E-07  |
| 16    | 1   | 853401    | 1500152   | 344   | 0.8896  | 646751     | amp  | 5.30E-14  |
| 16    | 11  | 32657241  | 32676389  | 5     | -0.9567 | 19148      | del  | 1.70E-233 |
| 16    | 11  | 637304    | 640400    | 4     | 2.0903  | 3096       | amp  | 1.36E-129 |
| 16    | 11  | 126987    | 626887    | 244   | 0.4398  | 499900     | amp  | 3.71E-12  |
| 16    | 12  | 42866186  | 42983266  | 4     | 1.0802  | 117080     | amp  | 5.34E-148 |
| 16    | 12  | 10542541  | 10560927  | 3     | -1.2456 | 18386      | del  | 7.02E-08  |
| 16    | 12  | 10561510  | 42864047  | 1546  | -0.2843 | 32302537   | del  | 2.19E-13  |
| 16    | 14  | 53162085  | 53173895  | 2     | 1.9287  | 11810      | amp  | 5.79E-93  |
| 16    | 14  | 50154853  | 50159884  | 2     | 1.8764  | 5031       | amp  | 2.39E-13  |
| 16    | 15  | 41047280  | 41056284  | 2     | 2.3676  | 9004       | amp  | 4.15E-42  |
| 16    | 15  | 20874796  | 21063439  | 4     | -0.8699 | 188643     | del  | 6.71E-21  |
| 16    | 17  | 18486721  | 18525811  | 7     | -0.482  | 39090      | del  | 2.30E-150 |
| 16    | 17  | 4693053   | 4700022   | 3     | 2.0419  | 6969       | amp  | 4.15E-77  |
| 16    | 17  | 15902781  | 15903431  | 3     | 1.6003  | 650        | amp  | 5.54E-10  |
| 16    | 17  | 6010      | 4692805   | 894   | 0.35    | 4686795    | amp  | 3.53E-10  |
| 16    | 18  | 163307    | 78005159  | 3095  | -0.6222 | 77841852   | del  | NA        |
| 16    | 19  | 110678    | 59092611  | 11624 | 0.4449  | 58981933   | amp  | NA        |
| 16    | 2   | 16080682  | 16081653  | 3     | 0.8055  | 971        | amp  | 2.72E-264 |
| 16    | 2   | 201750420 | 201754049 | 4     | 0.7122  | 3629       | amp  | 5.49E-101 |
| 16    | 2   | 220407946 | 220408744 | 2     | 1.9913  | 798        | amp  | 1.05E-40  |
| 16    | 2   | 198364505 | 198364998 | 3     | 1.676   | 493        | amp  | 2.68E-23  |
| 16    | 20  | 60889854  | 60891937  | 5     | 1.0153  | 2083       | amp  | 7.79E-12  |
| 16    | 20  | 60892400  | 60892717  | 2     | 2.4697  | 317        | amp  | 4.01E-11  |
| 16    | 20  | 60893509  | 62904573  | 556   | 0.4209  | 2011064    | amp  | NA        |
| 16    | 22  | 16256331  | 51237082  | 4281  | 0.2883  | 34980751   | amp  | NA        |
| 16    | 3   | 45017424  | 45017740  | 2     | 1.5619  | 316        | amp  | 0         |

| Pt-ID | chr | start     | end       | exons | m.log2  | eventsiz  | call | pval      |
|-------|-----|-----------|-----------|-------|---------|-----------|------|-----------|
| 16    | 4   | 40058523  | 40058650  | 2     | 1.8334  | 127       | amp  | 2.88E-18  |
| 16    | 4   | 76598202  | 76649828  | 3     | 0.6273  | 51626     | amp  | 1.06E-12  |
| 16    | 4   | 40075074  | 76587114  | 1563  | -0.3044 | 36512040  | del  | 2.38E-16  |
| 16    | 4   | 76678648  | 190947538 | 4409  | -0.2669 | 114268890 | del  | NA        |
| 16    | 6   | 43196998  | 43211221  | 2     | -1.1637 | 14223     | del  | 5.01E-101 |
| 16    | 6   | 74063575  | 74072399  | 3     | 0.9748  | 8824      | amp  | 1.41E-21  |
| 16    | 6   | 168720067 | 168841830 | 2     | 1.9859  | 121763    | amp  | 3.45E-12  |
| 16    | 6   | 105850721 | 106534194 | 2     | 1.6535  | 683473    | amp  | 7.31E-36  |
| 16    | 6   | 74072817  | 105845727 | 1234  | -0.2816 | 31772910  | del  | 9.74E-17  |
| 16    | 8   | 124408426 | 124440163 | 3     | 1.0961  | 31737     | amp  | 1.26E-115 |
| 16    | 9   | 133539980 | 133541994 | 2     | 2.041   | 2014      | amp  | 2.81E-26  |
| 16    | 9   | 130160183 | 133512400 | 812   | 0.3808  | 3352217   | amp  | 2.03E-08  |
| 16    | 9   | 133543544 | 141111400 | 1572  | 0.367   | 7567856   | amp  | NA        |
| 17    | 1   | 55352561  | 55446464  | 2     | 2.0487  | 93903     | amp  | 7.50E-56  |
| 17    | 1   | 17287252  | 17294697  | 5     | 1.8376  | 7445      | amp  | 2.56E-16  |
| 17    | 1   | 40768292  | 40769599  | 5     | 1.4226  | 1307      | amp  | 5.18E-16  |
| 17    | 1   | 11710522  | 11714375  | 2     | 2.8397  | 3853      | amp  | 7.34E-16  |
| 17    | 1   | 14362     | 11710001  | 1539  | 0.2662  | 11695639  | amp  | 7.77E-22  |
| 17    | 10  | 103874162 | 103892786 | 3     | 1.6203  | 18624     | amp  | 2.63E-33  |
| 17    | 10  | 103589600 | 103603252 | 4     | 1.1693  | 13652     | amp  | 5.00E-12  |
| 17    | 10  | 94833646  | 94834905  | 4     | 1.3916  | 1259      | amp  | 5.65E-08  |
| 17    | 11  | 33182844  | 33279167  | 2     | 1.4841  | 96323     | amp  | 5.24E-69  |
| 17    | 14  | 21493187  | 21493835  | 2     | 1.6392  | 648       | amp  | 8.60E-65  |
| 17    | 17  | 18285826  | 18286805  | 5     | 1.2471  | 979       | amp  | 5.92E-75  |
| 17    | 18  | 43418682  | 43420175  | 2     | 1.8467  | 1493      | amp  | 4.44E-13  |
| 17    | 18  | 43422070  | 78005159  | 1272  | -0.5061 | 34583089  | del  | NA        |
| 17    | 18  | 163307    | 43417477  | 1813  | -0.5733 | 43254170  | del  | 9.17E-14  |
| 17    | 19  | 20149981  | 20188802  | 3     | 1.0154  | 38821     | amp  | 3.58E-21  |
| 17    | 19  | 7926763   | 7928070   | 4     | 1.8879  | 1307      | amp  | 1.66E-10  |
| 17    | 19  | 14016871  | 14016955  | 2     | 2.5369  | 84        | amp  | 1.99E-08  |
| 17    | 19  | 110678    | 7925446   | 2146  | 0.3101  | 7814768   | amp  | 3.30E-11  |
| 17    | 2   | 42281175  | 42396489  | 6     | 0.7564  | 115314    | amp  | 2.42E-71  |
| 17    | 4   | 37687821  | 37828281  | 2     | 3.1308  | 140460    | amp  | 5.00E-28  |
| 17    | 4   | 184580081 | 184584999 | 3     | 2.3455  | 4918      | amp  | 6.15E-21  |
| 17    | 5   | 68665123  | 68665483  | 3     | 1.7591  | 360       | amp  | 5.46E-51  |
| 17    | 6   | 37664520  | 37787306  | 2     | 2.4868  | 122786    | amp  | 7.78E-36  |
| 17    | 6   | 34393808  | 34495108  | 4     | 1.5723  | 101300    | amp  | 1.64E-08  |
| 17    | 7   | 105752585 | 105752924 | 2     | 2.0502  | 339       | amp  | 2.82E-35  |
| 17    | Y   | 5605312   | 21152525  | 3     | -0.6225 | 15547213  | del  | NA        |
| 18    | 18  | 163307    | 78005159  | 3099  | -0.5753 | 77841852  | del  | NA        |
| 18    | 20  | 60897074  | 60897713  | 3     | 2.1564  | 639       | amp  | 4.75E-15  |
| 18    | 21  | 40684766  | 40685166  | 2     | -2.4125 | 400       | del  | 3.94E-12  |
| 18    | 22  | 50964183  | 50964674  | 3     | 1.9234  | 491       | amp  | 1.66E-09  |
| 18    | 7   | 105029094 | 105029237 | 2     | -2.205  | 143       | del  | 3.99E-15  |
| 18    | X   | 131348161 | 131351023 | 2     | 2.7019  | 2862      | amp  | 1.84E-12  |
| 19    | 1   | 1159211   | 1178823   | 8     | 1.281   | 19612     | amp  | 2.20E-17  |

| Pt-ID | chr | start     | end       | exons | m.log2  | eventsized | call | pval     |
|-------|-----|-----------|-----------|-------|---------|------------|------|----------|
| 19    | 12  | 123026596 | 123036004 | 10    | -0.7876 | 9408       | del  | 6.88E-12 |
| 19    | 13  | 113862912 | 113864286 | 3     | -1.8346 | 1374       | del  | 1.02E-13 |
| 19    | 16  | 30907927  | 30910735  | 2     | -2.1038 | 2808       | del  | 2.25E-10 |
| 19    | 16  | 67218588  | 67219038  | 3     | 1.5872  | 450        | amp  | 5.57E-08 |
| 19    | 7   | 100082850 | 100084443 | 2     | -2.6887 | 1593       | del  | 3.72E-19 |
| 20    | 11  | 47463162  | 47464207  | 3     | 0.9696  | 1045       | amp  | 2.59E-38 |
| 20    | 12  | 42877559  | 42983266  | 2     | 1.3137  | 105707     | amp  | 8.08E-23 |
| 20    | 14  | 19377593  | 106950170 | 6164  | 0.3067  | 87572577   | amp  | NA       |
| 20    | 15  | 79092533  | 79103462  | 2     | 1.8413  | 10929      | amp  | 3.45E-13 |
| 20    | 15  | 78556988  | 78562838  | 3     | -1.5787 | 5850       | del  | 7.45E-10 |
| 20    | 15  | 40895112  | 40907538  | 6     | -0.9303 | 12426      | del  | 2.12E-06 |
| 20    | 15  | 66420643  | 66545942  | 2     | -1.8197 | 125299     | del  | 2.06E-11 |
| 20    | 17  | 6010      | 81187692  | 11947 | 0.3652  | 81181682   | amp  | NA       |
| 20    | 19  | 50304978  | 50305237  | 2     | 2.1722  | 259        | amp  | 1.64E-11 |
| 20    | 2   | 191399284 | 191513847 | 2     | 1.7392  | 114563     | amp  | 3.41E-29 |
| 20    | 2   | 20424562  | 20425022  | 2     | 2.1915  | 460        | amp  | 4.61E-18 |
| 20    | 2   | 39664032  | 39931220  | 3     | 1.3561  | 267188     | amp  | 1.57E-13 |
| 20    | 20  | 68350     | 62904573  | 5106  | 0.3727  | 62836223   | amp  | NA       |
| 20    | 4   | 674880    | 677397    | 6     | 1.4668  | 2517       | amp  | 1.51E-68 |
| 20    | 4   | 53226     | 674297    | 61    | 0.4188  | 621071     | amp  | 9.69E-10 |
| 20    | 4   | 678271    | 190947538 | 7783  | 0.256   | 190269267  | amp  | NA       |
| 20    | 5   | 34656432  | 34656595  | 2     | 2.5226  | 163        | amp  | 1.49E-47 |
| 20    | 5   | 140372    | 34042927  | 1044  | 0.353   | 33902555   | amp  | 3.94E-16 |
| 20    | 5   | 34684611  | 180687001 | 7773  | 0.2831  | 146002390  | amp  | NA       |
| 20    | 8   | 116087    | 146279403 | 6881  | 0.3089  | 146163316  | amp  | NA       |
| 20    | 9   | 129376747 | 129377661 | 2     | 1.6728  | 914        | amp  | 2.27E-10 |
| 20    | 9   | 139960713 | 139971952 | 3     | 1.5488  | 11239      | amp  | 1.55E-09 |
| 20    | 9   | 139972501 | 141134069 | 342   | -0.2509 | 1161568    | del  | NA       |
| 20    | 9   | 129453114 | 139959973 | 2110  | -0.3124 | 10506859   | del  | 1.54E-12 |
| 20    | 9   | 14510     | 129265455 | 5550  | -0.4398 | 129250945  | del  | 8.98E-14 |
| 21    | 1   | 6479300   | 6500313   | 3     | 3.1359  | 21013      | amp  | 2.28E-69 |
| 21    | 1   | 14362     | 6475294   | 910   | 0.3419  | 6460932    | amp  | 6.05E-14 |
| 21    | 13  | 19408542  | 115089262 | 3616  | -0.4227 | 95680720   | del  | NA       |
| 21    | 14  | 77607945  | 77648101  | 2     | 2.9608  | 40156      | amp  | 7.62E-36 |
| 21    | 14  | 77679788  | 106950170 | 2007  | 0.4777  | 29270382   | amp  | NA       |
| 21    | 14  | 19377593  | 77605555  | 4122  | 0.3474  | 58227962   | amp  | 3.85E-35 |
| 21    | 16  | 5083273   | 5083829   | 2     | 2.5813  | 556        | amp  | 3.27E-37 |
| 21    | 16  | 96999     | 5081745   | 1741  | 0.3137  | 4984746    | amp  | 3.43E-17 |
| 21    | 17  | 40332887  | 40336077  | 2     | 2.7748  | 3190       | amp  | 7.73E-70 |
| 21    | 17  | 1944774   | 1958392   | 4     | 1.7931  | 13618      | amp  | 2.99E-20 |
| 21    | 17  | 38574022  | 38610179  | 4     | 0.9431  | 36157      | amp  | 6.22E-06 |
| 21    | 19  | 29703811  | 30019339  | 4     | 1.6634  | 315528     | amp  | 2.84E-11 |
| 21    | 2   | 219858096 | 219866366 | 2     | 2.6845  | 8270       | amp  | 5.49E-25 |
| 21    | 2   | 26698995  | 26699758  | 2     | 2.0486  | 763        | amp  | 4.48E-19 |
| 21    | 2   | 98139788  | 98152930  | 4     | -1.24   | 13142      | del  | 1.31E-16 |
| 21    | 20  | 68350     | 62904573  | 5071  | 0.2973  | 62836223   | amp  | NA       |



| Pt-ID | chr | start     | end       | exons | m.log2  | eventsiz  | call | pval      |
|-------|-----|-----------|-----------|-------|---------|-----------|------|-----------|
| 21    | 22  | 50967924  | 50970905  | 9     | 1.7397  | 2981      | amp  | 5.28E-18  |
| 21    | 5   | 218207    | 218355    | 2     | 3.9658  | 148       | amp  | 1.61E-61  |
| 21    | 5   | 140372    | 216843    | 22    | 0.6946  | 76471     | amp  | 3.78E-12  |
| 21    | 7   | 192968    | 158937412 | 9507  | 0.4259  | 158744444 | amp  | NA        |
| 21    | 9   | 124062078 | 124062333 | 2     | -1.6464 | 255       | del  | 2.77E-47  |
| 21    | X   | 2700106   | 154842452 | 6800  | -0.363  | 152142346 | del  | NA        |
| 21    | Y   | 4900710   | 22669237  | 4     | -0.6582 | 17768527  | del  | NA        |
| 22    | 12  | 76953176  | 77157853  | 2     | 1.3491  | 204677    | amp  | 4.14E-141 |
| 22    | 17  | 15902781  | 15903431  | 3     | -1.9756 | 650       | del  | 6.63E-155 |
| 22    | 17  | 46178629  | 46184919  | 2     | 2.5253  | 6290      | amp  | 1.76E-76  |
| 22    | 17  | 15905228  | 46178116  | 4519  | 0.2798  | 30272888  | amp  | 4.34E-154 |
| 22    | 17  | 46188069  | 81176760  | 4490  | 0.5325  | 34988691  | amp  | NA        |
| 22    | 18  | 163307    | 77960592  | 3071  | -0.8029 | 77797285  | del  | NA        |
| 22    | 19  | 110678    | 59092611  | 11496 | 0.3157  | 58981933  | amp  | NA        |
| 22    | 2   | 39664032  | 39893092  | 2     | -2.5546 | 229060    | del  | 2.58E-93  |
| 22    | 20  | 68350     | 62904573  | 5042  | 0.5158  | 62836223  | amp  | NA        |
| 22    | 5   | 140372    | 180687001 | 8760  | 0.319   | 180546629 | amp  | NA        |
| 22    | 8   | 145617140 | 145617659 | 4     | 2.1007  | 519       | amp  | 2.97E-06  |
| 22    | 8   | 145617990 | 146279403 | 218   | 0.3686  | 661413    | amp  | NA        |
| 22    | 9   | 96018580  | 96019229  | 2     | 1.9731  | 649       | amp  | 4.65E-84  |
| 22    | X   | 118708498 | 118709337 | 2     | 2.9454  | 839       | amp  | 3.38E-31  |
| 22    | X   | 69669539  | 69670018  | 2     | 1.9048  | 479       | amp  | 2.10E-10  |
| 23    | 20  | 68350     | 62904573  | 5047  | 0.2885  | 62836223  | amp  | NA        |
| 23    | Y   | 5605312   | 21152525  | 2     | 0.3783  | 15547213  | amp  | NA        |
| 24    | 1   | 55013900  | 55062931  | 7     | -0.7858 | 49031     | del  | 2.49E-85  |
| 24    | 14  | 19377593  | 19558990  | 4     | 0.9692  | 181397    | amp  | 3.65E-20  |
| 24    | 14  | 101011336 | 101193252 | 7     | -0.8406 | 181916    | del  | 2.32E-05  |
| 24    | 16  | 89767337  | 89768035  | 2     | -1.8864 | 698       | del  | 3.18E-08  |
| 24    | 18  | 163307    | 78005159  | 3090  | -0.7234 | 77841852  | del  | NA        |
| 24    | 19  | 14016871  | 14016955  | 2     | 2.4283  | 84        | amp  | 3.59E-17  |
| 24    | 2   | 47142861  | 47168312  | 2     | 1.7632  | 25451     | amp  | 2.38E-66  |
| 24    | 21  | 9907193   | 9968515   | 2     | -0.8457 | 61322     | del  | 1.18E-39  |
| 24    | 22  | 32217487  | 32218678  | 2     | -2.4704 | 1191      | del  | 1.25E-13  |
| 24    | 5   | 136834061 | 136834867 | 2     | -1.5442 | 806       | del  | 9.48E-07  |
| 24    | 7   | 98449043  | 98478712  | 7     | -0.8895 | 29669     | del  | 5.46E-64  |
| 24    | 7   | 128049809 | 128095883 | 2     | -2.0939 | 46074     | del  | 1.68E-13  |
| 25    | 1   | 155034935 | 155036212 | 2     | 1.9248  | 1277      | amp  | 9.44E-44  |
| 25    | 1   | 197744268 | 197871681 | 2     | 2.7156  | 127413    | amp  | 6.06E-17  |
| 25    | 1   | 154473911 | 154479352 | 3     | 1.3107  | 5441      | amp  | 8.10E-06  |
| 25    | 10  | 46167697  | 46222864  | 3     | 1.8181  | 55167     | amp  | 8.88E-30  |
| 25    | 10  | 43694380  | 43698745  | 7     | 1.0722  | 4365      | amp  | 3.44E-06  |
| 25    | 11  | 76066661  | 76091791  | 4     | -1.1527 | 25130     | del  | 2.73E-21  |
| 25    | 11  | 57194358  | 57243634  | 5     | 1.5171  | 49276     | amp  | 3.99E-18  |
| 25    | 11  | 124735281 | 124738697 | 2     | 2.018   | 3416      | amp  | 3.51E-08  |
| 25    | 13  | 48575315  | 48611702  | 2     | 3.3079  | 36387     | amp  | 2.62E-24  |
| 25    | 14  | 31343740  | 31344261  | 2     | 2.5837  | 521       | amp  | 8.36E-66  |

| Pt-ID | chr | start     | end       | exons | m.log2  | eventsize | call | pval      |
|-------|-----|-----------|-----------|-------|---------|-----------|------|-----------|
| 25    | 15  | 44829265  | 44829521  | 2     | 1.64    | 256       | amp  | 5.94E-26  |
| 25    | 15  | 27017548  | 27113875  | 5     | 1.3083  | 96327     | amp  | 1.13E-08  |
| 25    | 16  | 2140285   | 2142480   | 6     | 1.938   | 2195      | amp  | 3.74E-37  |
| 25    | 16  | 67208064  | 67219263  | 15    | 1.1488  | 11199     | amp  | 3.28E-18  |
| 25    | 16  | 1821070   | 1821489   | 2     | 3.3155  | 419       | amp  | 3.15E-09  |
| 25    | 16  | 1821896   | 2138712   | 188   | 0.4457  | 316816    | amp  | 3.60E-07  |
| 25    | 16  | 96999     | 1820881   | 704   | 0.4489  | 1723882   | amp  | 4.17E-11  |
| 25    | 17  | 2297336   | 2298168   | 3     | 2.3398  | 832       | amp  | 5.00E-61  |
| 25    | 17  | 1419749   | 1420212   | 2     | 2.9956  | 463       | amp  | 6.22E-11  |
| 25    | 17  | 1587765   | 1636820   | 19    | 1.1069  | 49055     | amp  | 2.68E-10  |
| 25    | 18  | 34854273  | 34855077  | 3     | 2.0658  | 804       | amp  | 3.37E-17  |
| 25    | 18  | 163307    | 34852978  | 1720  | -0.2705 | 34689671  | del  | 3.14E-19  |
| 25    | 19  | 14583278  | 14584190  | 2     | 3.4395  | 912       | amp  | 5.97E-16  |
| 25    | 19  | 55593459  | 55598081  | 8     | 1.6637  | 4622      | amp  | 3.64E-11  |
| 25    | 19  | 36595419  | 36612428  | 12    | 1.0975  | 17009     | amp  | 3.16E-07  |
| 25    | 19  | 110678    | 14582392  | 3902  | 0.2749  | 14471714  | amp  | 2.38E-26  |
| 25    | 2   | 219857737 | 219867856 | 5     | 2.2174  | 10119     | amp  | 2.67E-18  |
| 25    | 20  | 50158908  | 50179098  | 2     | 2.114   | 20190     | amp  | 2.56E-33  |
| 25    | 20  | 3652523   | 3654391   | 5     | 1.6904  | 1868      | amp  | 2.96E-12  |
| 25    | 20  | 50213313  | 62904573  | 1077  | 0.3045  | 12691260  | amp  | NA        |
| 25    | 4   | 53525281  | 53578620  | 2     | 2.8585  | 53339     | amp  | 3.35E-25  |
| 25    | 4   | 169753155 | 169798873 | 2     | 2.7359  | 45718     | amp  | 4.74E-20  |
| 25    | 5   | 122372203 | 122435348 | 4     | 1.508   | 63145     | amp  | 2.14E-18  |
| 25    | 5   | 179222584 | 179222941 | 3     | 1.9738  | 357       | amp  | 1.50E-06  |
| 25    | 6   | 31237269  | 31371370  | 15    | 0.9945  | 134101    | amp  | 1.39E-114 |
| 25    | 6   | 158589171 | 158589378 | 2     | 2.2711  | 207       | amp  | 2.55E-12  |
| 25    | 7   | 6210165   | 6210460   | 2     | 2.3289  | 295       | amp  | 7.11E-23  |
| 25    | 7   | 192968    | 6205364   | 605   | 0.2877  | 6012396   | amp  | 1.81E-08  |
| 25    | X   | 133678743 | 133680660 | 4     | 1.5057  | 1917      | amp  | 1.83E-34  |
| 25    | X   | 153186817 | 153187057 | 2     | 2.9736  | 240       | amp  | 2.68E-14  |
| 25    | X   | 19390770  | 19392594  | 3     | 1.9568  | 1824      | amp  | 2.87E-13  |
| 25    | X   | 153191589 | 154842452 | 373   | 0.2632  | 1650863   | amp  | NA        |
| 25    | Y   | 3447264   | 21152525  | 9     | -0.7498 | 17705261  | del  | NA        |
| 26    | 12  | 51663842  | 51664039  | 2     | 1.521   | 197       | amp  | 1.13E-47  |
| 26    | 15  | 72581715  | 72581967  | 2     | 1.8783  | 252       | amp  | 1.72E-22  |
| 26    | 15  | 74725930  | 74726081  | 2     | -1.8158 | 151       | del  | 1.93E-13  |
| 26    | 16  | 11680001  | 11681193  | 2     | 1.8104  | 1192      | amp  | 5.83E-10  |
| 26    | 17  | 79917515  | 79935425  | 3     | 1.9327  | 17910     | amp  | 1.71E-11  |
| 26    | 17  | 36734742  | 36861872  | 3     | -1.7421 | 127130    | del  | 1.56E-17  |
| 26    | 18  | 163307    | 78005159  | 3095  | -0.2914 | 77841852  | del  | NA        |
| 26    | 19  | 55327892  | 55328988  | 2     | -2.7692 | 1096      | del  | 1.34E-22  |
| 26    | 2   | 152955154 | 152955462 | 2     | 1.4989  | 308       | amp  | 4.93E-43  |
| 26    | 20  | 32031116  | 32077927  | 2     | -2.247  | 46811     | del  | 3.92E-18  |
| 26    | 20  | 3652523   | 3654220   | 6     | 1.0626  | 1697      | amp  | 3.21E-14  |
| 26    | 21  | 45681622  | 45707399  | 5     | -0.8359 | 25777     | del  | 1.49E-06  |
| 26    | 7   | 26241098  | 26241323  | 2     | 2.1304  | 225       | amp  | 2.42E-20  |

| Pt-ID | chr | start     | end       | exons | m.log2  | eventsized | call | pval     |
|-------|-----|-----------|-----------|-------|---------|------------|------|----------|
| 26    | 7   | 149487370 | 149488389 | 2     | 1.9362  | 1019       | amp  | 4.75E-14 |
| 26    | 9   | 138391554 | 138392482 | 2     | 2.0662  | 928        | amp  | 8.63E-10 |
| 27    | 5   | 178421441 | 178450775 | 2     | -2.323  | 29334      | del  | 7.82E-08 |
| 27    | Y   | 4900710   | 21152525  | 3     | 0.6789  | 16251815   | amp  | NA       |
| 28    | 11  | 1785021   | 1785474   | 2     | -1.561  | 453        | del  | 1.40E-13 |
| 28    | 11  | 842413    | 842940    | 3     | -1.2481 | 527        | del  | 6.29E-12 |
| 28    | 12  | 110429431 | 110437234 | 3     | 1.1023  | 7803       | amp  | 1.35E-09 |
| 28    | 13  | 21999790  | 22033192  | 2     | -1.5815 | 33402      | del  | 7.77E-13 |
| 28    | 15  | 78556486  | 78556988  | 2     | 1.4277  | 502        | amp  | 1.47E-11 |
| 28    | 19  | 1455382   | 1457963   | 5     | 0.9916  | 2581       | amp  | 1.09E-09 |
| 28    | 2   | 98152762  | 98162295  | 4     | -1.1969 | 9533       | del  | 1.56E-16 |
| 28    | 20  | 62587768  | 62587859  | 2     | 1.6292  | 91         | amp  | 5.41E-10 |
| 28    | 21  | 15000702  | 15002176  | 2     | -1.4792 | 1474       | del  | 2.52E-14 |
| 28    | 22  | 41939994  | 41967846  | 3     | 1.6825  | 27852      | amp  | 8.93E-22 |
| 28    | 4   | 40058523  | 40058650  | 2     | -1.3182 | 127        | del  | 3.55E-15 |
| 28    | 7   | 5413685   | 5415664   | 2     | 1.7504  | 1979       | amp  | 1.83E-14 |
| 28    | 8   | 145692142 | 145692341 | 2     | 1.5523  | 199        | amp  | 1.74E-11 |
| 29    | 11  | 92930943  | 93063882  | 2     | -1.6708 | 132939     | del  | 1.79E-20 |
| 29    | 14  | 105945067 | 105945315 | 2     | -1.5057 | 248        | del  | 2.73E-08 |
| 29    | 15  | 91499841  | 91500342  | 2     | -1.27   | 501        | del  | 1.49E-12 |
| 29    | 18  | 163307    | 78005159  | 3105  | -0.4333 | 77841852   | del  | NA       |
| 29    | 21  | 40684997  | 40685368  | 3     | -1.2854 | 371        | del  | 1.72E-14 |
| 29    | 22  | 50311910  | 50312282  | 2     | -1.4297 | 372        | del  | 8.72E-10 |
| 29    | 6   | 32522466  | 32548023  | 3     | 1.3549  | 25557      | amp  | 1.78E-17 |
| 29    | 6   | 44095080  | 44095375  | 2     | -1.3447 | 295        | del  | 6.83E-15 |
| 29    | 8   | 7843527   | 7854985   | 2     | -2.0906 | 11458      | del  | 4.10E-32 |
| 30    | 1   | 6484847   | 6500993   | 5     | -0.9413 | 16146      | del  | 1.49E-14 |
| 30    | 1   | 1564512   | 1565671   | 4     | -0.8249 | 1159       | del  | 5.65E-05 |
| 30    | 14  | 89029252  | 89029690  | 2     | 1.244   | 438        | amp  | 7.95E-10 |
| 30    | 14  | 101012837 | 101034247 | 2     | -1.2994 | 21410      | del  | 7.14E-08 |
| 30    | 16  | 88851308  | 88870185  | 2     | -1.5886 | 18877      | del  | 1.28E-09 |
| 30    | 16  | 67184767  | 67193740  | 6     | -0.7413 | 8973       | del  | 1.75E-09 |
| 30    | 17  | 27229600  | 27229835  | 2     | -1.6498 | 235        | del  | 4.71E-23 |
| 30    | 19  | 41105307  | 41115651  | 10    | -0.6434 | 10344      | del  | 9.69E-12 |
| 30    | 2   | 242447919 | 242498869 | 2     | -2.0534 | 50950      | del  | 3.85E-22 |
| 30    | 2   | 98154630  | 98158541  | 4     | 1.1909  | 3911       | amp  | 4.80E-19 |
| 30    | 3   | 128720471 | 128722636 | 2     | -1.4131 | 2165       | del  | 5.52E-14 |
| 30    | 4   | 77134579  | 77172852  | 2     | -1.3202 | 38273      | del  | 3.67E-12 |
| 30    | 7   | 1272653   | 1275467   | 3     | -1.1286 | 2814       | del  | 7.32E-11 |
| 31    | 1   | 236767721 | 236849769 | 2     | 1.4789  | 82048      | amp  | 1.06E-07 |
| 31    | 12  | 51663842  | 51664039  | 2     | 1.9986  | 197        | amp  | 4.46E-21 |
| 31    | 14  | 55493745  | 55493843  | 2     | 1.779   | 98         | amp  | 2.25E-25 |
| 31    | 15  | 89877903  | 89922278  | 4     | 1.5091  | 44375      | amp  | 1.47E-11 |
| 31    | 15  | 68119097  | 68121516  | 2     | 1.4036  | 2419       | amp  | 1.23E-05 |
| 31    | 16  | 4733843   | 4743978   | 4     | 1.4437  | 10135      | amp  | 2.06E-17 |
| 31    | 17  | 43198268  | 43198577  | 2     | 1.8278  | 309        | amp  | 5.80E-39 |

| Pt-ID | chr | start     | end       | exons | m.log2  | eventsized | call | pval      |
|-------|-----|-----------|-----------|-------|---------|------------|------|-----------|
| 31    | 2   | 176944836 | 176946905 | 2     | 1.3819  | 2069       | amp  | 7.31E-46  |
| 31    | 4   | 958963    | 966999    | 15    | 1.1054  | 8036       | amp  | 1.64E-48  |
| 31    | 4   | 53226     | 956926    | 133   | 0.2937  | 903700     | amp  | 8.51E-08  |
| 31    | 5   | 892623    | 892968    | 3     | 2.2887  | 345        | amp  | 1.46E-57  |
| 31    | 5   | 140372    | 891754    | 128   | 0.3645  | 751382     | amp  | 1.56E-13  |
| 31    | 6   | 31553955  | 31555417  | 3     | -1.1866 | 1462       | del  | 2.01E-53  |
| 31    | 6   | 119669627 | 119670706 | 2     | 1.8736  | 1079       | amp  | 7.43E-13  |
| 31    | 7   | 128049809 | 128095883 | 2     | -1.2311 | 46074      | del  | 7.87E-13  |
| 32    | 1   | 36641799  | 36644521  | 5     | 2.2437  | 2722       | amp  | 6.85E-24  |
| 32    | 1   | 151811213 | 151811581 | 2     | 2.9421  | 368        | amp  | 6.05E-19  |
| 32    | 1   | 153935004 | 153936072 | 2     | 3.0486  | 1068       | amp  | 3.01E-17  |
| 32    | 10  | 76994695  | 76995373  | 4     | 1.9142  | 678        | amp  | 3.59E-12  |
| 32    | 10  | 18429605  | 18429809  | 2     | 2.1817  | 204        | amp  | 3.22E-08  |
| 32    | 11  | 57281430  | 57282916  | 2     | -2.6448 | 1486       | del  | 8.92E-50  |
| 32    | 14  | 75017766  | 75078153  | 7     | 1.8218  | 60387      | amp  | 1.14E-22  |
| 32    | 15  | 42160266  | 42162440  | 4     | 1.7179  | 2174       | amp  | 4.68E-21  |
| 32    | 16  | 67218588  | 67219263  | 4     | 2.0799  | 675        | amp  | 4.57E-14  |
| 32    | 18  | 163307    | 78005159  | 3069  | -0.264  | 77841852   | del  | NA        |
| 32    | 4   | 26322321  | 26322447  | 2     | 3.1496  | 126        | amp  | 9.21E-24  |
| 32    | 8   | 145730628 | 145731614 | 4     | 2.217   | 986        | amp  | 1.90E-07  |
| 33    | 1   | 976552    | 976857    | 2     | 2.249   | 305        | amp  | 4.38E-22  |
| 33    | 11  | 842823    | 842940    | 2     | 2.3509  | 117        | amp  | 3.72E-23  |
| 33    | 11  | 66056425  | 66059372  | 2     | -1.6725 | 2947       | del  | 3.99E-14  |
| 33    | 12  | 132628239 | 132629398 | 3     | 1.2932  | 1159       | amp  | 1.19E-08  |
| 33    | 17  | 79633547  | 79633760  | 2     | 1.8424  | 213        | amp  | 7.65E-09  |
| 33    | 17  | 36878930  | 36880872  | 2     | 1.2853  | 1942       | amp  | 8.23E-06  |
| 33    | 2   | 85360733  | 85361138  | 2     | 1.6145  | 405        | amp  | 3.08E-13  |
| 33    | 2   | 220041481 | 220042938 | 2     | 1.5539  | 1457       | amp  | 6.44E-10  |
| 33    | 2   | 219696460 | 219745254 | 5     | 0.6786  | 48794      | amp  | 6.60E-06  |
| 33    | 20  | 3388121   | 3451664   | 2     | -1.7223 | 63543      | del  | 1.45E-11  |
| 33    | Y   | 4966255   | 21152525  | 5     | -0.4696 | 16186270   | del  | NA        |
| 34    | 1   | 113257597 | 113266566 | 5     | 0.7549  | 8969       | amp  | 4.46E-50  |
| 34    | 1   | 201858031 | 201858572 | 2     | 1.9367  | 541        | amp  | 3.49E-30  |
| 34    | 10  | 94821020  | 94835582  | 11    | 1.1521  | 14562      | amp  | 1.63E-47  |
| 34    | 10  | 47903158  | 47929794  | 8     | -0.3095 | 26636      | del  | 3.77E-15  |
| 34    | 10  | 76994367  | 77161513  | 9     | 1.4338  | 167146     | amp  | 3.79E-34  |
| 34    | 10  | 77163513  | 94817979  | 876   | 0.3128  | 17654466   | amp  | 7.32E-28  |
| 34    | 10  | 48355088  | 76993729  | 1660  | 0.367   | 28638641   | amp  | 3.75E-16  |
| 34    | 10  | 94836300  | 135440068 | 3411  | 0.4066  | 40603768   | amp  | NA        |
| 34    | 10  | 92827     | 47899950  | 2183  | 0.2849  | 47807123   | amp  | 1.04E-18  |
| 34    | 11  | 46665828  | 46686398  | 11    | -0.5537 | 20570      | del  | 5.95E-36  |
| 34    | 11  | 65307018  | 65307483  | 3     | 2.2514  | 465        | amp  | 2.73E-30  |
| 34    | 11  | 78859754  | 129245880 | 3063  | -0.855  | 50386126   | del  | 9.92E-233 |
| 34    | 12  | 87983     | 90795     | 7     | 0.816   | 2812       | amp  | 7.10E-53  |
| 34    | 13  | 19408542  | 115089262 | 3634  | -0.2797 | 95680720   | del  | NA        |
| 34    | 14  | 89029252  | 89029690  | 2     | 2.6112  | 438        | amp  | 1.37E-64  |

| Pt-ID | chr | start     | end       | exons | m.log2  | eventsized | call | pval        |
|-------|-----|-----------|-----------|-------|---------|------------|------|-------------|
| 34    | 14  | 31343740  | 31344261  | 2     | 1.5547  | 521        | amp  | 7.49E-40    |
| 34    | 14  | 73238440  | 73406927  | 6     | 0.8329  | 168487     | amp  | 5.73E-07    |
| 34    | 16  | 29087976  | 29110425  | 12    | -0.9327 | 22449      | del  | 5.50E-39    |
| 34    | 17  | 37886446  | 37886659  | 2     | 2.0412  | 213        | amp  | 1.52E-113   |
| 34    | 17  | 15903006  | 15903431  | 2     | 2.0561  | 425        | amp  | 2.87E-17    |
| 34    | 18  | 77710723  | 78005159  | 23    | -0.3574 | 294436     | del  | NA          |
| 34    | 18  | 34844636  | 35145318  | 10    | 0.7393  | 300682     | amp  | 4.49E-08    |
| 34    | 18  | 77137246  | 77703328  | 30    | 0.4747  | 566082     | amp  | 5.64E-09    |
| 34    | 19  | 18699494  | 18709581  | 12    | 1.3757  | 10087      | amp  | 6.17E-14    |
| 34    | 19  | 5724818   | 5751657   | 11    | -0.7378 | 26839      | del  | 1.80E-07    |
| 34    | 19  | 110678    | 5720687   | 1529  | 0.4329  | 5610009    | amp  | 1.22E-11    |
| 34    | 2   | 219857737 | 219858096 | 2     | 2.9449  | 359        | amp  | 4.52E-35    |
| 34    | 2   | 198649779 | 198669425 | 3     | 1.4714  | 19646      | amp  | 2.69E-33    |
| 34    | 2   | 27592742  | 27593388  | 3     | 1.4528  | 646        | amp  | 8.03E-24    |
| 34    | 2   | 176866887 | 176987412 | 12    | 0.7005  | 120525     | amp  | 2.92E-16    |
| 34    | 2   | 131796425 | 131802941 | 8     | 0.8317  | 6516       | amp  | 4.25E-16    |
| 34    | 2   | 107053128 | 107073426 | 5     | -1.5098 | 20298      | del  | 2.56E-13    |
| 34    | 2   | 98158373  | 98158541  | 2     | -2.7828 | 168        | del  | 1.28E-12    |
| 34    | 2   | 152671652 | 152684644 | 2     | 2.0097  | 12992      | amp  | 1.20E-11    |
| 34    | 2   | 71680752  | 71693831  | 2     | 0.961   | 13079      | amp  | 6.81E-08    |
| 34    | 2   | 131803610 | 152670682 | 801   | -0.2714 | 20867072   | del  | 8.81E-13    |
| 34    | 2   | 176988661 | 198646445 | 1435  | -0.3213 | 21657784   | del  | 6.15E-12    |
| 34    | 2   | 152689287 | 176860285 | 1466  | -0.3023 | 24170998   | del  | 6.05E-13    |
| 34    | 2   | 27594135  | 71661871  | 2697  | -0.2509 | 44067736   | del  | 6.35E-22    |
| 34    | 20  | 68350     | 62904573  | 5076  | 0.5407  | 62836223   | amp  | NA          |
| 34    | 21  | 47648347  | 47648645  | 2     | 2.4681  | 298        | amp  | 8.29E-16    |
| 34    | 22  | 41957013  | 41967846  | 2     | 2.7353  | 10833      | amp  | 1.01E-19    |
| 34    | 5   | 6632996   | 6633499   | 2     | 2.9184  | 503        | amp  | 3.60E-175   |
| 34    | 5   | 140372    | 6632711   | 368   | 0.767   | 6492339    | amp  | 8.41E-08    |
| 34    | 5   | 6651954   | 180687001 | 8430  | 0.329   | 174035047  | amp  | NA          |
| 34    | 6   | 41606194  | 41606476  | 2     | 2.7523  | 282        | amp  | 2.95E-55    |
| 34    | 6   | 31974789  | 31978761  | 3     | -2.3852 | 3972       | del  | 3.44E-17    |
| 34    | 7   | 45002259  | 45002568  | 2     | 3.0913  | 309        | amp  | 3.85E-39    |
| 34    | 7   | 2281796   | 2281856   | 2     | 2.5007  | 60         | amp  | 4.58E-39    |
| 34    | 7   | 192968    | 2279052   | 210   | 0.5531  | 2086084    | amp  | 0.000436046 |
| 34    | 8   | 116087    | 146279403 | 6829  | 0.3473  | 146163316  | amp  | NA          |
| 34    | X   | 114364717 | 114391164 | 4     | -1.2729 | 26447      | del  | 2.13E-98    |
| 34    | X   | 108976367 | 109246341 | 2     | 1.5471  | 269974     | amp  | 2.89E-07    |
| 35    | 1   | 36772198  | 36772707  | 3     | 1.607   | 509        | amp  | 2.75E-51    |
| 35    | 1   | 161008340 | 161008669 | 2     | 1.43    | 329        | amp  | 1.04E-17    |
| 35    | 1   | 13328195  | 13497569  | 3     | -1.4821 | 169374     | del  | 1.86E-14    |
| 35    | 1   | 14362     | 13182960  | 1818  | 0.2571  | 13168598   | amp  | 8.21E-50    |
| 35    | 10  | 47911048  | 47941961  | 7     | -0.722  | 30913      | del  | 3.96E-43    |
| 35    | 10  | 46222666  | 46222864  | 2     | 2.4029  | 198        | amp  | 2.70E-17    |
| 35    | 11  | 124972027 | 125034558 | 2     | 2.0517  | 62531      | amp  | 2.29E-13    |
| 35    | 12  | 56321508  | 56325811  | 3     | 1.8545  | 4303       | amp  | 1.02E-58    |

| Pt-ID | chr | start     | end       | exons | m.log2  | eventsized | call | pval        |
|-------|-----|-----------|-----------|-------|---------|------------|------|-------------|
| 35    | 13  | 28674604  | 28712683  | 3     | 1.9702  | 38079      | amp  | 3.09E-38    |
| 35    | 14  | 103987599 | 104029298 | 11    | 0.9075  | 41699      | amp  | 5.08E-10    |
| 35    | 14  | 104037959 | 106950170 | 355   | 0.3055  | 2912211    | amp  | NA          |
| 35    | 16  | 75257038  | 75257345  | 2     | 1.7974  | 307        | amp  | 6.76E-19    |
| 35    | 16  | 46918307  | 46918605  | 2     | -2.1488 | 298        | del  | 6.06E-15    |
| 35    | 18  | 657603    | 657947    | 2     | 1.486   | 344        | amp  | 2.46E-13    |
| 35    | 18  | 57364443  | 57567191  | 2     | 1.2152  | 202748     | amp  | 7.53E-10    |
| 35    | 18  | 77724581  | 78005159  | 24    | -0.3744 | 280578     | del  | NA          |
| 35    | 18  | 163307    | 649964    | 57    | -0.4698 | 486657     | del  | 1.24E-16    |
| 35    | 18  | 46446223  | 57363860  | 505   | -0.4122 | 10917637   | del  | 5.45E-10    |
| 35    | 18  | 57569878  | 77472971  | 523   | -0.3835 | 19903093   | del  | 1.48E-09    |
| 35    | 18  | 659640    | 45553747  | 1954  | -0.4178 | 44894107   | del  | 2.44E-10    |
| 35    | 19  | 17799179  | 17830302  | 2     | 2.7987  | 31123      | amp  | 2.93E-36    |
| 35    | 19  | 34001933  | 34112860  | 4     | 1.3123  | 110927     | amp  | 6.60E-07    |
| 35    | 2   | 130939702 | 130940199 | 2     | 2.5474  | 497        | amp  | 1.51E-76    |
| 35    | 2   | 239148301 | 239148465 | 2     | 3.2677  | 164        | amp  | 2.81E-21    |
| 35    | 2   | 20646834  | 20870223  | 10    | 0.6962  | 223389     | amp  | 1.95E-31    |
| 35    | 2   | 239152679 | 243102106 | 452   | 0.2781  | 3949427    | amp  | NA          |
| 35    | 21  | 9907193   | 9968515   | 3     | 1.0601  | 61322      | amp  | 2.31E-75    |
| 35    | 22  | 31686950  | 31687165  | 2     | 2.3807  | 215        | amp  | 7.01E-23    |
| 35    | 22  | 50964183  | 50965004  | 4     | 1.5891  | 821        | amp  | 5.15E-07    |
| 35    | 3   | 33260177  | 33318933  | 2     | 1.6659  | 58756      | amp  | 7.46E-141   |
| 35    | 5   | 68665123  | 68665760  | 4     | 0.6219  | 637        | amp  | 1.06E-93    |
| 35    | 6   | 31855817  | 31856375  | 3     | 0.9092  | 558        | amp  | 1.35E-126   |
| 35    | 6   | 15663044  | 16129316  | 2     | 2.1973  | 466272     | amp  | 1.09E-29    |
| 35    | 8   | 59571753  | 59572131  | 2     | 1.9527  | 378        | amp  | 6.95E-231   |
| 35    | 9   | 79792360  | 79792720  | 2     | 2.0329  | 360        | amp  | 1.10E-144   |
| 35    | 9   | 14510     | 116234    | 9     | 0.5735  | 101724     | amp  | 5.41E-18    |
| 35    | X   | 106959128 | 107069083 | 5     | 0.7055  | 109955     | amp  | 4.08E-96    |
| 35    | Y   | 4899946   | 21621174  | 7     | -0.6409 | 16721228   | del  | NA          |
| 36    | 1   | 42800729  | 42846467  | 2     | -2.0516 | 45738      | del  | 2.35E-38    |
| 36    | 11  | 9335867   | 9406168   | 2     | -1.3483 | 70301      | del  | 1.08E-26    |
| 36    | 11  | 6440214   | 6440575   | 2     | -1.6014 | 361        | del  | 9.22E-19    |
| 36    | 12  | 110433977 | 110437234 | 2     | -1.5845 | 3257       | del  | 1.79E-09    |
| 36    | 12  | 132628239 | 132628992 | 2     | -1.487  | 753        | del  | 1.16E-07    |
| 36    | 13  | 113862912 | 113864286 | 3     | -1.2338 | 1374       | del  | 1.43E-10    |
| 36    | 15  | 51057664  | 51200945  | 2     | -1.5852 | 143281     | del  | 2.51E-11    |
| 36    | 16  | 2228129   | 2228902   | 2     | 1.3742  | 773        | amp  | 4.39E-13    |
| 36    | 2   | 238536223 | 238617186 | 2     | -0.9534 | 80963      | del  | 0.009378145 |
| 36    | 21  | 40684766  | 40685368  | 3     | -1.1605 | 602        | del  | 9.22E-07    |
| 36    | 4   | 39979076  | 40058523  | 3     | -1.1601 | 79447      | del  | 2.59E-18    |
| 36    | 4   | 40058650  | 190947538 | 5983  | 0.341   | 150888888  | amp  | NA          |
| 36    | 5   | 10307736  | 10353827  | 2     | -1.1555 | 46091      | del  | 2.46E-45    |
| 36    | 7   | 148725412 | 148823507 | 10    | -0.8598 | 98095      | del  | 6.34E-15    |
| 36    | 9   | 69204538  | 69218509  | 5     | 0.8184  | 13971      | amp  | 9.49E-109   |
| 36    | 9   | 140063211 | 140063722 | 2     | -1.6925 | 511        | del  | 4.91E-09    |

| Pt-ID | chr | start     | end       | exons | m.log2  | eventsiz | call | pval      |
|-------|-----|-----------|-----------|-------|---------|----------|------|-----------|
| 36    | Y   | 3447264   | 21152525  | 9     | 0.3612  | 17705261 | amp  | NA        |
| 37    | 12  | 42877559  | 42983266  | 2     | -1.5176 | 105707   | del  | 4.22E-30  |
| 37    | 13  | 21750371  | 21750741  | 2     | 1.5822  | 370      | amp  | 2.65E-12  |
| 37    | 13  | 114897909 | 115000361 | 2     | -1.6139 | 102452   | del  | 1.98E-06  |
| 37    | 15  | 27017827  | 27018791  | 2     | -2.2251 | 964      | del  | 1.06E-20  |
| 37    | 15  | 78556486  | 78562838  | 4     | -1.2967 | 6352     | del  | 8.97E-13  |
| 37    | 17  | 1552493   | 1552705   | 2     | -2.0176 | 212      | del  | 2.00E-15  |
| 37    | 18  | 163307    | 78005159  | 3094  | -0.2813 | 77841852 | del  | NA        |
| 37    | 19  | 17007266  | 17008699  | 3     | 2.4883  | 1433     | amp  | 1.43E-23  |
| 37    | 2   | 73144603  | 73151437  | 2     | -1.8861 | 6834     | del  | 1.03E-14  |
| 37    | 2   | 239148301 | 239148465 | 2     | -1.8861 | 164      | del  | 1.81E-10  |
| 37    | 22  | 50963900  | 50964674  | 4     | -1.3158 | 774      | del  | 4.24E-09  |
| 37    | 3   | 44903379  | 44903473  | 2     | -1.4679 | 94       | del  | 2.93E-50  |
| 37    | 4   | 966999    | 980784    | 2     | -2.6288 | 13785    | del  | 3.74E-29  |
| 37    | 6   | 35108981  | 35182189  | 2     | -1.6402 | 73208    | del  | 1.02E-42  |
| 37    | 6   | 135818720 | 135818938 | 2     | -1.902  | 218      | del  | 7.39E-17  |
| 37    | 7   | 8301629   | 8302069   | 3     | 1.1006  | 440      | amp  | 3.61E-26  |
| 37    | 7   | 143059108 | 143078359 | 2     | -1.8861 | 19251    | del  | 6.27E-12  |
| 37    | 7   | 98030113  | 98248954  | 3     | -1.2165 | 218841   | del  | 3.95E-42  |
| 37    | 9   | 139092427 | 139096779 | 3     | 1.6105  | 4352     | amp  | 1.39E-09  |
| 37    | Y   | 3447264   | 21152525  | 10    | 0.2993  | 17705261 | amp  | NA        |
| 38    | 1   | 113245620 | 113249454 | 4     | -0.7927 | 3834     | del  | 5.49E-90  |
| 38    | 11  | 720596    | 720829    | 2     | 1.1288  | 233      | amp  | 1.64E-105 |
| 38    | 11  | 626887    | 637304    | 2     | 1.1843  | 10417    | amp  | 4.14E-16  |
| 38    | 11  | 639432    | 720061    | 24    | -0.2655 | 80629    | del  | 1.24E-13  |
| 38    | 11  | 113930430 | 113931287 | 2     | -1.4642 | 857      | del  | 1.67E-10  |
| 38    | 12  | 48298737  | 48357329  | 2     | 1.1491  | 58592    | amp  | 8.20E-56  |
| 38    | 12  | 31552587  | 31576530  | 6     | -0.5403 | 23943    | del  | 1.30E-12  |
| 38    | 16  | 46918307  | 46918605  | 2     | -2.3395 | 298      | del  | 1.12E-33  |
| 38    | 16  | 755680    | 771800    | 8     | -0.9561 | 16120    | del  | 3.59E-21  |
| 38    | 19  | 55317405  | 55320287  | 2     | -1.9359 | 2882     | del  | 2.16E-13  |
| 38    | 2   | 98158373  | 98158541  | 2     | -1.7284 | 168      | del  | 1.45E-126 |
| 38    | 2   | 96931606  | 96931883  | 2     | -2.0724 | 277      | del  | 6.46E-43  |
| 38    | 2   | 97166175  | 97215924  | 6     | -0.6958 | 49749    | del  | 7.12E-15  |
| 38    | 2   | 39893092  | 39931220  | 2     | -1.4359 | 38128    | del  | 6.84E-09  |
| 38    | 20  | 34287113  | 34287274  | 2     | 1.1867  | 161      | amp  | 7.69E-13  |
| 38    | 22  | 19747080  | 19748427  | 2     | 1.5841  | 1347     | amp  | 4.15E-14  |
| 38    | 3   | 164756865 | 164796220 | 20    | 0.6586  | 39355    | amp  | 1.98E-36  |
| 38    | 7   | 100082850 | 100084443 | 2     | -1.6262 | 1593     | del  | 2.78E-91  |
| 38    | 8   | 145690735 | 145691737 | 3     | -1.6395 | 1002     | del  | 1.37E-13  |
| 38    | 8   | 141467737 | 141468379 | 2     | -1.3541 | 642      | del  | 1.35E-05  |
| 38    | 9   | 37033982  | 37302184  | 4     | 0.7315  | 268202   | amp  | 2.42E-155 |
| 39    | 11  | 626696    | 639647    | 5     | 1.0407  | 12951    | amp  | 1.52E-11  |
| 39    | 11  | 92930943  | 93065381  | 3     | -1.0826 | 134438   | del  | 1.41E-07  |
| 39    | 13  | 42534988  | 42622888  | 2     | -1.8367 | 87900    | del  | 1.40E-14  |
| 39    | 14  | 105941130 | 105954667 | 11    | -0.7616 | 13537    | del  | 1.47E-08  |

| Pt-ID | chr | start     | end       | exons | m.log2  | eventsized | call | pval     |
|-------|-----|-----------|-----------|-------|---------|------------|------|----------|
| 39    | 16  | 57559812  | 57570411  | 3     | -1.4523 | 10599      | del  | 2.81E-10 |
| 39    | 17  | 76355830  | 76374734  | 2     | -2.6637 | 18904      | del  | 2.20E-20 |
| 39    | 19  | 1582620   | 1592520   | 4     | -1.4773 | 9900       | del  | 2.03E-13 |
| 39    | 2   | 220494793 | 220496689 | 2     | 1.736   | 1896       | amp  | 2.14E-11 |
| 39    | 3   | 44903379  | 44903473  | 2     | -1.5877 | 94         | del  | 5.79E-24 |
| 39    | 4   | 6201979   | 6271576   | 2     | -2.0123 | 69597      | del  | 5.42E-18 |
| 39    | 7   | 128577993 | 128578270 | 2     | -1.8417 | 277        | del  | 8.42E-15 |
| 39    | X   | 153640289 | 153640427 | 2     | 1.3709  | 138        | amp  | 1.83E-07 |
| 39    | Y   | 3447264   | 21152525  | 5     | -0.9441 | 17705261   | del  | NA       |
| 40    | 1   | 53387224  | 53392947  | 2     | -2.5975 | 5723       | del  | 1.58E-46 |
| 40    | 10  | 76994367  | 76995373  | 5     | -1.3983 | 1006       | del  | 1.33E-17 |
| 40    | 10  | 27964449  | 28034635  | 6     | -1.041  | 70186      | del  | 8.23E-08 |
| 40    | 12  | 104531918 | 104609558 | 2     | -2.0975 | 77640      | del  | 1.32E-08 |
| 40    | 17  | 59481781  | 59533806  | 6     | -1.4536 | 52025      | del  | 5.06E-42 |
| 40    | 17  | 36214741  | 36244310  | 4     | 0.9433  | 29569      | amp  | 1.64E-20 |
| 40    | 19  | 50962174  | 50962367  | 2     | -3.5845 | 193        | del  | 2.29E-18 |
| 40    | 2   | 232790134 | 232826292 | 3     | -2.4961 | 36158      | del  | 9.60E-15 |
| 40    | 20  | 44420470  | 44420575  | 2     | -2.4477 | 105        | del  | 6.75E-15 |
| 40    | 20  | 62369173  | 62374051  | 9     | -1.4637 | 4878       | del  | 4.23E-10 |
| 40    | 20  | 62374231  | 62904573  | 136   | -0.2679 | 530342     | del  | NA       |
| 40    | 22  | 21983298  | 21984139  | 4     | -1.8152 | 841        | del  | 2.18E-15 |
| 40    | 4   | 48271768  | 48343612  | 2     | -2.1473 | 71844      | del  | 8.61E-17 |
| 40    | 4   | 26322321  | 26322447  | 2     | 1.6995  | 126        | amp  | 2.43E-07 |
| 41    | 14  | 104639313 | 104640042 | 3     | 2.2606  | 729        | amp  | 2.69E-09 |
| 41    | 14  | 104640484 | 106950170 | 237   | 0.3641  | 2309686    | amp  | NA       |
| 41    | 21  | 40684766  | 40684997  | 2     | -2.3208 | 231        | del  | 1.60E-12 |
| 41    | 3   | 120169530 | 120169743 | 2     | 2.5678  | 213        | amp  | 3.03E-18 |
| 41    | 4   | 995466    | 997336    | 6     | 1.4747  | 1870       | amp  | 7.07E-52 |
| 41    | 4   | 53226     | 995255    | 154   | 0.2672  | 942029     | amp  | 1.48E-06 |
| 41    | 9   | 152033    | 163977    | 5     | -1.0308 | 11944      | del  | 2.13E-85 |
| 42    | 1   | 42800729  | 42846467  | 2     | -1.6334 | 45738      | del  | 0        |
| 42    | 10  | 134755939 | 134901408 | 2     | -1.6799 | 145469     | del  | 5.08E-08 |
| 42    | 11  | 67771126  | 67771417  | 2     | 1.6975  | 291        | amp  | 3.47E-16 |
| 42    | 11  | 1077597   | 1081648   | 11    | 0.6336  | 4051       | amp  | 4.26E-14 |
| 42    | 11  | 637304    | 639432    | 2     | -1.7559 | 2128       | del  | 1.50E-10 |
| 42    | 14  | 103800725 | 103801235 | 2     | 1.8379  | 510        | amp  | 2.34E-08 |
| 42    | 14  | 103801989 | 106950170 | 401   | 0.3866  | 3148181    | amp  | NA       |
| 42    | 15  | 83015283  | 83015549  | 2     | 1.9051  | 266        | amp  | 1.13E-18 |
| 42    | 15  | 90645507  | 90744561  | 3     | -1.5367 | 99054      | del  | 1.50E-18 |
| 42    | 4   | 682781    | 699572    | 2     | -1.6799 | 16791      | del  | 7.80E-16 |
| 42    | 5   | 68662329  | 68665483  | 4     | -1.051  | 3154       | del  | 5.19E-12 |
| 42    | 7   | 1543538   | 1543958   | 2     | -2.3409 | 420        | del  | 3.59E-30 |
| 42    | 7   | 64601602  | 64613394  | 2     | 1.5105  | 11792      | amp  | 4.01E-12 |
| 42    | 8   | 48873493  | 48873690  | 2     | -1.4096 | 197        | del  | 6.50E-21 |
| 42    | Y   | 14954165  | 14958857  | 4     | 0.9394  | 4692       | amp  | 5.73E-07 |
| 43    | 1   | 94147153  | 94312387  | 2     | 2.2659  | 165234     | amp  | 8.63E-21 |



| Pt-ID | chr | start     | end       | exons | m.log2  | eventsized | call | pval        |
|-------|-----|-----------|-----------|-------|---------|------------|------|-------------|
| 43    | 16  | 46864995  | 46918605  | 3     | 2.4994  | 53610      | amp  | 6.90E-35    |
| 43    | 17  | 74261285  | 74261987  | 2     | 2.0226  | 702        | amp  | 3.01E-13    |
| 43    | 18  | 163307    | 78005159  | 3099  | -0.3195 | 77841852   | del  | NA          |
| 43    | 20  | 32031116  | 32077927  | 2     | -1.7313 | 46811      | del  | 7.87E-11    |
| 43    | 22  | 50964183  | 50964429  | 2     | 1.8974  | 246        | amp  | 8.68E-17    |
| 43    | 3   | 46735132  | 46742822  | 2     | 2.0612  | 7690       | amp  | 2.99E-16    |
| 43    | 8   | 38089008  | 38089470  | 2     | -1.8425 | 462        | del  | 2.15E-12    |
| 43    | 8   | 145013517 | 145027893 | 7     | 1.0759  | 14376      | amp  | 8.83E-10    |
| 43    | 9   | 69432634  | 69440027  | 2     | -1.7313 | 7393       | del  | 1.89E-11    |
| 44    | 1   | 36771993  | 36772707  | 4     | -1.4705 | 714        | del  | 3.90E-92    |
| 44    | 1   | 197744268 | 197871681 | 2     | -1.5349 | 127413     | del  | 9.08E-36    |
| 44    | 1   | 16069329  | 16070654  | 3     | -1.5806 | 1325       | del  | 1.34E-11    |
| 44    | 1   | 14362     | 16068916  | 2005  | -0.3007 | 16054554   | del  | 1.20E-29    |
| 44    | 10  | 102746846 | 102790995 | 22    | -0.5612 | 44149      | del  | 6.45E-42    |
| 44    | 10  | 69644426  | 69647174  | 3     | -0.7801 | 2748       | del  | 5.91E-18    |
| 44    | 10  | 64028309  | 64133915  | 2     | -1.3332 | 105606     | del  | 1.18E-12    |
| 44    | 11  | 77899618  | 77907291  | 3     | -1.594  | 7673       | del  | 3.52E-99    |
| 44    | 12  | 42877559  | 42983266  | 2     | -2.3875 | 105707     | del  | 3.66E-213   |
| 44    | 12  | 110011151 | 110011499 | 2     | -2.2125 | 348        | del  | 5.67E-11    |
| 44    | 13  | 21750371  | 21750741  | 2     | -1.8025 | 370        | del  | 2.85E-53    |
| 44    | 14  | 89029252  | 89029690  | 2     | -2.5323 | 438        | del  | 1.21E-42    |
| 44    | 14  | 93650903  | 93651154  | 2     | -1.8029 | 251        | del  | 5.99E-09    |
| 44    | 14  | 103394762 | 103396912 | 8     | -1.2107 | 2150       | del  | 8.46E-08    |
| 44    | 14  | 89258650  | 89290977  | 3     | -0.6715 | 32327      | del  | 0.000513425 |
| 44    | 14  | 89029994  | 89220855  | 59    | 0.2529  | 190861     | amp  | 6.49E-07    |
| 44    | 14  | 103398715 | 106950170 | 462   | -0.3107 | 3551455    | del  | NA          |
| 44    | 15  | 45421657  | 45427979  | 9     | -0.8102 | 6322       | del  | 1.53E-82    |
| 44    | 16  | 28634451  | 28834413  | 2     | -2.719  | 199962     | del  | 1.03E-43    |
| 44    | 16  | 85145938  | 85646923  | 3     | -1.5201 | 500985     | del  | 0.000189601 |
| 44    | 16  | 85667519  | 90142249  | 593   | -0.3817 | 4474730    | del  | NA          |
| 44    | 16  | 96999     | 28631383  | 3552  | -0.2695 | 28534384   | del  | 5.00E-119   |
| 44    | 17  | 65989016  | 66031847  | 2     | -1.6287 | 42831      | del  | 1.33E-91    |
| 44    | 17  | 1552493   | 1552705   | 2     | -3.267  | 212        | del  | 1.70E-32    |
| 44    | 17  | 44949882  | 44953610  | 3     | -1.046  | 3728       | del  | 6.65E-21    |
| 44    | 17  | 6010      | 1551643   | 197   | -0.3403 | 1545633    | del  | 1.84E-18    |
| 44    | 17  | 66033225  | 81187692  | 2476  | -0.2892 | 15154467   | del  | NA          |
| 44    | 18  | 34844636  | 35145318  | 10    | -0.5793 | 300682     | del  | 1.18E-09    |
| 44    | 19  | 18699804  | 18700222  | 2     | -3.1612 | 418        | del  | 1.86E-18    |
| 44    | 19  | 110678    | 18699494  | 5035  | -0.4072 | 18588816   | del  | 5.28E-18    |
| 44    | 19  | 18701663  | 59092611  | 6603  | -0.3148 | 40390948   | del  | NA          |
| 44    | 2   | 128180492 | 128180849 | 3     | -1.0281 | 357        | del  | 4.73E-222   |
| 44    | 2   | 74399712  | 74425689  | 3     | -1.2816 | 25977      | del  | 1.93E-40    |
| 44    | 20  | 18038178  | 18118498  | 2     | 1.8198  | 80320      | amp  | 1.79E-56    |
| 44    | 21  | 47556695  | 47570032  | 8     | -1.1577 | 13337      | del  | 1.55E-12    |
| 44    | 22  | 30494840  | 30572051  | 9     | 0.5142  | 77211      | amp  | 7.04E-18    |
| 44    | 22  | 30636441  | 51237082  | 2676  | -0.2716 | 20600641   | del  | NA          |

| Pt-ID | chr | start     | end       | exons | m.log2  | eventsized | call | pval        |
|-------|-----|-----------|-----------|-------|---------|------------|------|-------------|
| 44    | 3   | 33759299  | 33840065  | 2     | -1.1516 | 80766      | del  | 1.50E-148   |
| 44    | 3   | 131080688 | 131100889 | 4     | -0.4827 | 20201      | del  | 8.09E-68    |
| 44    | 4   | 996056    | 997132    | 3     | -2.4801 | 1076       | del  | 4.39E-15    |
| 44    | 4   | 4291712   | 4291923   | 3     | -0.8325 | 211        | del  | 1.62E-07    |
| 44    | 4   | 4543523   | 4861391   | 2     | -1.4315 | 317868     | del  | 8.24E-109   |
| 44    | 4   | 53226     | 995769    | 158   | -0.4112 | 942543     | del  | 1.48E-13    |
| 44    | 4   | 997336    | 4288245   | 465   | -0.258  | 3290909    | del  | 0.000186571 |
| 44    | 6   | 32485162  | 32485830  | 2     | 1.7086  | 668        | amp  | 1.80E-233   |
| 44    | 6   | 125474878 | 125475419 | 2     | -1.6964 | 541        | del  | 1.17E-23    |
| 44    | 6   | 29595262  | 29600626  | 5     | -0.8156 | 5364       | del  | 2.34E-08    |
| 44    | 7   | 1543538   | 1543958   | 2     | -2.7885 | 420        | del  | 1.72E-78    |
| 44    | 7   | 72648647  | 72649222  | 2     | -2.2838 | 575        | del  | 3.38E-64    |
| 44    | 7   | 156802353 | 156931654 | 2     | -1.9495 | 129301     | del  | 2.74E-10    |
| 44    | 7   | 192968    | 1542536   | 169   | -0.4327 | 1349568    | del  | 4.63E-10    |
| 44    | 8   | 22225049  | 22265822  | 3     | -0.9514 | 40773      | del  | 1.36E-46    |
| 44    | 8   | 141545566 | 141568583 | 11    | -0.521  | 23017      | del  | 4.66E-10    |
| 44    | 8   | 146278447 | 146279403 | 3     | 0.2793  | 956        | amp  | NA          |
| 44    | 8   | 142138719 | 146277971 | 851   | -0.4461 | 4139252    | del  | 1.01E-05    |
| 44    | 9   | 139090497 | 139096779 | 6     | -2.1717 | 6282       | del  | 4.89E-21    |
| 44    | 9   | 139098181 | 141134069 | 758   | -0.4481 | 2035888    | del  | NA          |
| 44    | X   | 108976367 | 109245862 | 2     | -1.3208 | 269495     | del  | 2.34E-118   |
| 44    | Y   | 4899946   | 21621174  | 8     | 0.2575  | 16721228   | amp  | NA          |
| 45    | 1   | 28844744  | 28879528  | 3     | 2.7101  | 34784      | amp  | 3.06E-157   |
| 45    | 1   | 156594142 | 156594892 | 3     | 2.1178  | 750        | amp  | 6.70E-52    |
| 45    | 1   | 14362     | 28843236  | 4011  | 0.3777  | 28828874   | amp  | 5.23E-19    |
| 45    | 11  | 10011043  | 10215448  | 12    | -0.7332 | 204405     | del  | 1.95E-136   |
| 45    | 11  | 126987    | 9989887   | 1615  | 0.2833  | 9862900    | amp  | 7.33E-81    |
| 45    | 12  | 26348268  | 26348505  | 2     | 1.9204  | 237        | amp  | 5.28E-216   |
| 45    | 12  | 3047279   | 3129799   | 9     | 1.0229  | 82520      | amp  | 2.54E-123   |
| 45    | 12  | 102224336 | 102271104 | 2     | 2.4835  | 46768      | amp  | 3.56E-28    |
| 45    | 12  | 111747844 | 111779583 | 7     | 1.0683  | 31739      | amp  | 0.000669594 |
| 45    | 12  | 111785327 | 133778729 | 2226  | 0.2818  | 21993402   | amp  | NA          |
| 45    | 13  | 96293548  | 96329401  | 5     | 0.6969  | 35853      | amp  | 1.87E-31    |
| 45    | 13  | 21750371  | 21750741  | 2     | 1.9356  | 370        | amp  | 1.90E-09    |
| 45    | 13  | 19408542  | 21746758  | 210   | -0.2598 | 2338216    | del  | 2.50E-09    |
| 45    | 13  | 21751050  | 96285487  | 2433  | -0.3355 | 74534437   | del  | 8.00E-06    |
| 45    | 14  | 67981802  | 68026324  | 5     | 1.1642  | 44522      | amp  | 2.71E-53    |
| 45    | 15  | 72581715  | 72582279  | 2     | 2.3008  | 564        | amp  | 2.05E-17    |
| 45    | 16  | 55559419  | 55616825  | 14    | -0.7762 | 57406      | del  | 5.70E-33    |
| 45    | 16  | 55690555  | 90142249  | 3416  | 0.3053  | 34451694   | amp  | NA          |
| 45    | 16  | 96999     | 55542912  | 4959  | 0.3491  | 55445913   | amp  | 1.68E-103   |
| 45    | 17  | 60757160  | 60766212  | 10    | 1.1894  | 9052       | amp  | 8.81E-143   |
| 45    | 17  | 7296462   | 7296785   | 2     | 2.3724  | 323        | amp  | 4.04E-53    |
| 45    | 17  | 2595054   | 2596073   | 5     | 1.8288  | 1019       | amp  | 9.94E-09    |
| 45    | 17  | 6010      | 2594902   | 422   | 0.4743  | 2588892    | amp  | 7.71E-06    |
| 45    | 17  | 2597193   | 7296109   | 1154  | 0.3857  | 4698916    | amp  | 3.37E-07    |

| Pt-ID | chr | start     | end       | exons | m.log2  | eventsiz  | call | pval       |
|-------|-----|-----------|-----------|-------|---------|-----------|------|------------|
| 45    | 17  | 60766882  | 81187692  | 3086  | 0.3212  | 20420810  | amp  | NA         |
| 45    | 18  | 34833729  | 34901765  | 10    | 0.6085  | 68036     | amp  | 4.23E-12   |
| 45    | 19  | 17566235  | 17597982  | 5     | 2.3782  | 31747     | amp  | 6.69E-30   |
| 45    | 19  | 43967750  | 43983528  | 6     | 1.5053  | 15778     | amp  | 3.88E-27   |
| 45    | 19  | 43990417  | 59092611  | 3638  | 0.5205  | 15102194  | amp  | NA         |
| 45    | 19  | 110678    | 17535739  | 4639  | 0.6511  | 17425061  | amp  | 8.20E-20   |
| 45    | 19  | 17598268  | 43967277  | 3274  | 0.4959  | 26369009  | amp  | 2.11E-26   |
| 45    | 2   | 26101034  | 26256728  | 10    | 0.865   | 155694    | amp  | 9.09E-168  |
| 45    | 2   | 20845099  | 20866423  | 3     | 1.1643  | 21324     | amp  | 0.00549652 |
| 45    | 20  | 58440442  | 58560055  | 55    | -0.768  | 119613    | del  | 3.58E-56   |
| 45    | 20  | 58562507  | 62904573  | 686   | 0.4542  | 4342066   | amp  | NA         |
| 45    | 22  | 43538931  | 43555215  | 2     | 3.1703  | 16284     | amp  | 2.68E-11   |
| 45    | 22  | 43557057  | 51237082  | 864   | 0.4201  | 7680025   | amp  | NA         |
| 45    | 22  | 16256331  | 43537167  | 3381  | 0.3461  | 27280836  | amp  | 1.36E-13   |
| 45    | 3   | 122283194 | 122283460 | 2     | 1.1249  | 266       | amp  | 3.68E-66   |
| 45    | 3   | 101231934 | 101293041 | 4     | 0.6492  | 61107     | amp  | 2.51E-09   |
| 45    | 3   | 101298633 | 122282957 | 1113  | -0.3154 | 20984324  | del  | 1.05E-10   |
| 45    | 4   | 185724473 | 186066912 | 8     | 0.7339  | 342439    | amp  | 3.50E-09   |
| 45    | 4   | 53226     | 185719450 | 7600  | -0.2852 | 185666224 | del  | 2.27E-280  |
| 45    | 5   | 179222786 | 179222941 | 2     | 3.7072  | 155       | amp  | 9.06E-16   |
| 45    | 5   | 180047875 | 180052868 | 6     | 1.7368  | 4993      | amp  | 1.40E-06   |
| 45    | 5   | 52405541  | 52776594  | 2     | 2.1222  | 371053    | amp  | 4.21E-233  |
| 45    | 5   | 180053110 | 180687001 | 74    | 0.3153  | 633891    | amp  | NA         |
| 45    | 5   | 179223253 | 180047608 | 130   | 0.2752  | 824355    | amp  | 7.35E-08   |
| 45    | 6   | 159239113 | 159240348 | 2     | 2.4577  | 1235      | amp  | 4.64E-13   |
| 45    | 8   | 28351772  | 28357449  | 2     | -1.7989 | 5677      | del  | 1.17E-34   |
| 45    | 8   | 17434700  | 17491582  | 5     | 0.9322  | 56882     | amp  | 1.88E-16   |
| 45    | 8   | 142138719 | 146279403 | 849   | 0.5505  | 4140684   | amp  | NA         |
| 45    | 8   | 28360186  | 141900641 | 4433  | -0.2659 | 113540455 | del  | 0          |
| 45    | 9   | 26946894  | 26947144  | 2     | 2.1239  | 250       | amp  | 1.23E-22   |
| 45    | 9   | 69204538  | 69440027  | 20    | -0.9961 | 235489    | del  | 5.08E-290  |
| 45    | 9   | 14510     | 26935010  | 956   | -0.2911 | 26920500  | del  | 1.54E-12   |
| 45    | X   | 133678743 | 133680660 | 4     | 1.0275  | 1917      | amp  | 2.34E-51   |
| 45    | Y   | 2654895   | 26980088  | 283   | -0.303  | 24325193  | del  | NA         |
| 46    | 1   | 26437655  | 26438267  | 2     | -2.1236 | 612       | del  | 2.57E-17   |
| 46    | 11  | 637304    | 639432    | 2     | -2.3515 | 2128      | del  | 8.07E-20   |
| 46    | 14  | 105945315 | 105945461 | 2     | -2.4161 | 146       | del  | 6.10E-08   |
| 46    | 2   | 85360733  | 85361138  | 2     | -2.208  | 405       | del  | 5.76E-19   |
| 46    | 2   | 239148301 | 239148465 | 2     | -2.3515 | 164       | del  | 7.16E-12   |
| 46    | 21  | 47648347  | 47648645  | 2     | 1.9024  | 298       | amp  | 9.62E-13   |
| 46    | 3   | 46735132  | 46742822  | 2     | -3.0476 | 7690      | del  | 8.15E-39   |
| 46    | 3   | 53880109  | 53880576  | 2     | 1.7132  | 467       | amp  | 5.77E-12   |
| 46    | X   | 48555130  | 48557292  | 2     | -2.1046 | 2162      | del  | 4.21E-10   |
| 47    | 1   | 36786656  | 36788571  | 3     | -2.6076 | 1915      | del  | 2.03E-84   |
| 47    | 1   | 155580006 | 155580215 | 2     | -2.1005 | 209       | del  | 2.90E-73   |
| 47    | 1   | 36772707  | 36786515  | 12    | -0.2938 | 13808     | del  | 6.37E-20   |

| Pt-ID | chr | start     | end       | exons | m.log2  | eventsized | call | pval        |
|-------|-----|-----------|-----------|-------|---------|------------|------|-------------|
| 47    | 1   | 36771993  | 36772442  | 3     | -1.6276 | 449        | del  | 1.07E-08    |
| 47    | 10  | 94821766  | 94834905  | 9     | -0.7158 | 13139      | del  | 8.19E-37    |
| 47    | 10  | 12084753  | 12123470  | 4     | -1.071  | 38717      | del  | 8.87E-22    |
| 47    | 10  | 1094803   | 1102775   | 2     | -1.9044 | 7972       | del  | 1.97E-12    |
| 47    | 10  | 93999102  | 94050919  | 3     | -1.0899 | 51817      | del  | 7.14E-09    |
| 47    | 10  | 94070891  | 94821020  | 81    | 0.2554  | 750129     | amp  | 3.32E-11    |
| 47    | 11  | 61100379  | 61100666  | 2     | -2.4116 | 287        | del  | 1.04E-21    |
| 47    | 11  | 74178442  | 74303628  | 4     | -1.3123 | 125186     | del  | 1.85E-71    |
| 47    | 11  | 61102091  | 74172999  | 2944  | -0.2514 | 13070908   | del  | 9.93E-20    |
| 47    | 12  | 19282647  | 19282984  | 2     | -1.5821 | 337        | del  | 2.82E-118   |
| 47    | 14  | 103388992 | 103396912 | 11    | -0.9495 | 7920       | del  | 2.16E-05    |
| 47    | 16  | 215972    | 216266    | 2     | -3.3708 | 294        | del  | 1.21E-68    |
| 47    | 16  | 57481253  | 57481401  | 2     | -3.5653 | 148        | del  | 1.21E-24    |
| 47    | 16  | 28917187  | 28922208  | 4     | -1.816  | 5021       | del  | 4.89E-11    |
| 47    | 16  | 84213551  | 84214648  | 3     | -1.6902 | 1097       | del  | 6.68E-09    |
| 47    | 16  | 96999     | 204270    | 45    | -0.4086 | 107271     | del  | 4.33E-21    |
| 47    | 16  | 85143831  | 85646923  | 4     | -1.5859 | 503092     | del  | 0.001020126 |
| 47    | 16  | 84214933  | 85141636  | 128   | -0.3686 | 926703     | del  | 5.42E-10    |
| 47    | 16  | 85667519  | 90142249  | 587   | -0.5251 | 4474730    | del  | NA          |
| 47    | 16  | 57484951  | 84211523  | 2365  | -0.3513 | 26726572   | del  | 1.32E-11    |
| 47    | 16  | 28922404  | 57474683  | 1685  | -0.25   | 28552279   | del  | 2.05E-25    |
| 47    | 17  | 43198268  | 43209614  | 3     | -1.9018 | 11346      | del  | 1.09E-90    |
| 47    | 17  | 15902781  | 15903431  | 3     | -1.5976 | 650        | del  | 9.01E-17    |
| 47    | 17  | 79980701  | 79981279  | 2     | -2.5187 | 578        | del  | 2.97E-11    |
| 47    | 17  | 79982153  | 81187692  | 282   | -0.2922 | 1205539    | del  | NA          |
| 47    | 18  | 163307    | 78005159  | 3087  | -0.2647 | 77841852   | del  | NA          |
| 47    | 19  | 110678    | 59092611  | 11611 | -0.3154 | 58981933   | del  | NA          |
| 47    | 2   | 158453871 | 158485083 | 2     | -1.7612 | 31212      | del  | 1.24E-192   |
| 47    | 20  | 3653183   | 3653367   | 2     | -2.2755 | 184        | del  | 1.82E-39    |
| 47    | 3   | 122631689 | 122640761 | 7     | -0.6292 | 9072       | del  | 6.30E-60    |
| 47    | 3   | 122512463 | 122513900 | 2     | -0.9549 | 1437       | del  | 7.66E-08    |
| 47    | 4   | 184580081 | 184580445 | 2     | -2.1912 | 364        | del  | 3.42E-19    |
| 47    | 7   | 100228511 | 100275120 | 27    | -0.7725 | 46609      | del  | 1.41E-87    |
| 47    | 7   | 140396620 | 140396714 | 2     | -1.2481 | 94         | del  | 4.11E-14    |
| 47    | 8   | 145669562 | 145669772 | 2     | -2.8822 | 210        | del  | 3.98E-08    |
| 47    | 8   | 62626827  | 63161500  | 2     | -2.1281 | 534673     | del  | 2.30E-205   |
| 47    | 8   | 145675314 | 146279403 | 145   | -0.4535 | 604089     | del  | NA          |
| 47    | 9   | 127702384 | 127703249 | 2     | -1.1312 | 865        | del  | 4.05E-12    |
| 47    | 9   | 123555426 | 123555631 | 2     | -1.9297 | 205        | del  | 1.91E-10    |
| 47    | 9   | 126118447 | 126129450 | 5     | -0.931  | 11003      | del  | 0.000224414 |
| 47    | 9   | 127704887 | 141111400 | 2540  | -0.2703 | 13406513   | del  | NA          |
| 48    | 10  | 44144032  | 44144249  | 2     | -1.887  | 217        | del  | 2.15E-23    |
| 48    | 11  | 73087404  | 73087712  | 2     | -1.7057 | 308        | del  | 4.98E-18    |
| 48    | 12  | 58145957  | 58148899  | 2     | 1.5947  | 2942       | amp  | 3.08E-18    |
| 48    | 12  | 654534    | 655811    | 2     | -1.2003 | 1277       | del  | 7.17E-14    |
| 48    | 12  | 68726007  | 69004651  | 2     | -1.2805 | 278644     | del  | 1.83E-10    |

| <b>Pt-ID</b> | <b>chr</b> | <b>start</b> | <b>end</b> | <b>exons</b> | <b>m.log2</b> | <b>eventsized</b> | <b>call</b> | <b>pval</b> |
|--------------|------------|--------------|------------|--------------|---------------|-------------------|-------------|-------------|
| 48           | 14         | 101012837    | 101034247  | 2            | -1.3458       | 21410             | del         | 8.50E-08    |
| 48           | 15         | 75230255     | 75287900   | 3            | -1.3183       | 57645             | del         | 7.12E-16    |
| 48           | 16         | 89880927     | 89920693   | 6            | -0.7874       | 39766             | del         | 2.20E-06    |
| 48           | 17         | 73900620     | 73900889   | 2            | 1.4055        | 269               | amp         | 1.85E-11    |
| 48           | 19         | 45720785     | 45721454   | 2            | -1.7635       | 669               | del         | 1.04E-13    |
| 48           | 19         | 19650487     | 19651012   | 2            | -1.4558       | 525               | del         | 1.74E-09    |
| 48           | 2          | 173600022    | 173600853  | 3            | -1.106        | 831               | del         | 1.26E-12    |
| 48           | 21         | 14990669     | 14995125   | 3            | 1.4678        | 4456              | amp         | 1.30E-18    |
| 48           | 22         | 50964429     | 50964674   | 2            | -1.5041       | 245               | del         | 3.44E-10    |
| 48           | 22         | 21983298     | 21983596   | 2            | -1.4146       | 298               | del         | 4.20E-09    |
| 48           | 3          | 122640761    | 122641086  | 2            | -1.2995       | 325               | del         | 1.45E-12    |
| 48           | 8          | 95961381     | 96037220   | 2            | -1.4336       | 75839             | del         | 2.43E-47    |
| 48           | 9          | 69218509     | 69229611   | 2            | 1.2909        | 11102             | amp         | 3.85E-30    |
| 48           | X          | 152864419    | 152907896  | 2            | -2.2555       | 43477             | del         | 1.94E-28    |
| 48           | Y          | 3447264      | 23557585   | 14           | -0.4827       | 20110321          | del         | NA          |

SI Table 13: Sanger validation of SNV

| Gene       | Patient No | Query Condition           | Ref->Mut | Result        |
|------------|------------|---------------------------|----------|---------------|
| ABCA13     | 9          | chr7:48467390_48467390    | A->G     | not validated |
| ABCC12     | 2          | chr16:48167686_48167686   | G -> A   | validated     |
| ADAMTS6    | 28         | chr5:64748016             | G>C      | Validated     |
| AICDA      | 8          | chr12:8758008_8758008     | C ->T    | Validated     |
| AKAP6      | 12         | chr14:33292849_33292849   | G -> T   | Validated     |
| APOB       | 7          | chr2:21237379_21237379    | G->T     | validated     |
| ASCC3      | 5          | chr6:100988080_100988080  | C->T     | validated     |
| ATP4A      | 12         | chr19:36050924_36050924   | C ->T    | Validated     |
| C14orf177  | 16         | chr14:99183604-99183604   | A -> G   | not validated |
| C16orf46   | 1          | chr16:81094863_81094863   | G->T     | validated     |
| C1orf174   | 2          | chr1:3807255_3807255      | C -> G   | validated     |
| CAPN7      | 24         | chr3:15262338             | C>G      | Validated     |
| CARD11     | 4          | chr7:2956964_2956964      | C ->T    | validated     |
| CCDC117    | 1          | chr22:29169745_29169745   | G->A     | validated     |
| CLCN1      | 18         | chr7:143039135            | G>T      | Validated     |
| CNOT1      | 3          | chr16:58585058_58585058   | G->A     | validated     |
| COL4A4     | 1          | chr2:228004909_228004909  | C->G     | validated     |
| CORIN      | 3          | chr4:47647197_47647197    | C->T     | validated     |
| CSGALNACT1 | 7          | chr8:19362801_19362801    | T->C     | validated     |
| DBR1       | 12         | chr3:137890486_137890486  | T -> C   | validated     |
| DDX60      | 9          | chr4:169188789_169188789  | G->T     | validated     |
| DHRS7B     | 37         | chr17:21094386            | C>G      | Validated     |
| DHX15      | 18         | chr4:24543533             | C>T      | Validated     |
| DNAH17     | 6          | chr17:76456029_76456029   | C ->T    | Validated     |
| DNAH7      | 2          | chr2:196723400_196723400  | T -> C   | validated     |
| DPH2       | 3          | chr1:44436775_44436775    | T->G     | validated     |
| EPB41      | 26         | chr1:29379748             | A>G      | Validated     |
| FAM101A    | 22         | chr12:124798854-124798854 | C ->T    | Validated     |
| FAM153C    | 26         | chr5:177468759            | C>T      | not validated |
| FAM5C      | 4          | chr1:190250791_190250791  | C ->T    | validated     |
| FAM83C     | 1          | chr20:33876327_33876327   | G->A     | validated     |
| FGD1       | 4          | chrx:54494335_54494335    | G -> A   | validated     |
| FNDC1      | 4          | chr6:159654566_159654566  | C->T     | validated     |
| GALNT14    | 10         | chr2:31133822_31133822    | A -> G   | validated     |
| GNAT2      | 10         | chr1:110146671_110146671  | A -> G   | validated     |
| GPAT2      | 13         | chr2:96690175_96690175    | C ->T    | Validated     |
| GPR152     | 1          | chr11:67218883_67218883   | G->C     | validated     |
| GPR68      | 1          | chr14:91701046_91701046   | C->T     | validated     |
| HAGHL      | 6          | chr16:779430_779430       | C -> A   | Validated     |
| HAUS4      | 3          | chr14:23417166_23417166   | C->T     | validated     |
| HIST1H2AC  | 13         | chr6:26124714_26124714    | A -> T   | Validated     |
| HSPH1      | 9          | chr13:31713024_31713024   | G->A     | validated     |
| ICMT       | 36         | chr1:6285164              | T>C      | Validated     |
| ITGA1      | 1          | chr5:52229777_52229777    | T->A     | validated     |

| Gene     | Patient No | Query Condition          | Ref->Mut | Result        |
|----------|------------|--------------------------|----------|---------------|
| KIAA0232 | 7          | chr4:6826352_6826352     | A->G     | validated     |
| KRT24    | 7          | chr17:38859884_38859884  | G->A     | validated     |
| LRPPRC   | 5          | chr2:44206974_44206974   | G->T     | validated     |
| LRRC37A2 | 19         | chr17:44626866           | T>C      | not validated |
| MAP4K1   | 6          | chr19:39083940_39083940  | C -> T   | Validated     |
| MARVELD2 | 28         | chr5:68715500            | C>G      | Validated     |
| MBD3L4   | 1          | chr19:7038129_7038129    | C->T     | not validated |
| MEN1     | 11         | chr11:64577233           | G>C      | Validated     |
| MEN1     | 11         | chr11:64577233           | G>C      | Validated     |
| MEN1     | 11         | chr11:64577233           | G>C      | Validated     |
| MUC16    | 12         | chr19:9086187_9086187    | T -> A   | Validated     |
| MYOM3    | 9          | chr1:24397614_24397614   | C->A     | validated     |
| MYSM1    | 3          | chr1:59141181_59141181   | C->A     | validated     |
| NBEAL2   | 1          | chr3:47037310_47037310   | G->A     | validated     |
| NBPF15   | 40         | chr1:148579636           | T>C      | not validated |
| NDEL1    | 1          | chr17:8349109_8349109    | T->A     | validated     |
| NDST4    | 10         | chr4:115997466_115997466 | A -> T   | validated     |
| NEK1     | 38         | chr4:170483347           | C>T      | Validated     |
| NFASC    | 5          | chr1:204946827_204946827 | C->G     | validated     |
| NHS      | 1          | chrX:17744016_17744016   | C->A     | validated     |
| NLRP3    | 18         | chr1:247588841           | G>A      | Validated     |
| OR10J1   | 22         | chr1:159410465-159410465 | A -> C   | Validated     |
| OR5M3    | 1          | chr11:56237508_56237508  | T->C     | not validated |
| PAN2     | 1          | chr12:56713109_56713109  | G->A     | validated     |
| PAN3     | 22         | chr13:28794512-28794512  | C -> G   | Validated     |
| PARP4    | 8          | chr13:25030574_25030574  | A -> C   | Validated     |
| PCDH7    | 2          | chr4:30725445_30725445   | G -> T   | validated     |
| PCDHB12  | 12         | chr5:140588938_140588938 | G->T     | Validated     |
| PDIA5    | 5          | chr3:122864976_122864976 | A->C     | validated     |
| PDYN     | 5          | chr20:1961099_1961099    | C->T     | validated     |
| PHF3     | 10         | chr6:64413510_64413510   | A -> G   | validated     |
| PIK3C2A  | 1          | chr11:17167273_17167273  | G->C     | validated     |
| PKHD1L1  | 2          | chr8:110509401_110509401 | A -> G   | validated     |
| PLXNA3   | 1          | chrX:153696254_153696254 | C->T     | validated     |
| POLR2G   | 19         | chr11:62532690           | T>A      | Validated     |
| PRAMEF6  | 42         | chr1:13368333            | C>A      | not validated |
| PTPN5    | 4          | chr11:18763891_18763891  | G -> T   | validated     |
| RCN2     | 7          | chr15:77227986_77227986  | A->G     | validated     |
| RNF139   | 3          | chr8:125498207_125498207 | A->G     | validated     |
| SEMA5B   | 13         | chr3:122631069_122631069 | C -> G   | Validated     |
| SERINC1  | 4          | chr6:122779806_122779806 | A -> T   | validated     |
| SIPA1L1  | 6          | chr14:72090840_72090840  | C -> T   | Validated     |
| SMAD1    | 13         | chr4:146479003           | C>A      | Validated     |
| SMPD3    | 6          | chr16:68397715_68397715  | C -> T   | Validated     |
| SNX26    | 3          | chr19:36271912_36271912  | T->G     | validated     |

| Gene    | Patient No | Query Condition          | Ref->Mut | Result         |
|---------|------------|--------------------------|----------|----------------|
| SRCAP   | 2          | chr16:30727628_30727628  | T -> C   | validated      |
| STAP1   | 24         | chr4:68456657            | G>T      | Validated      |
| STYK1   | 12         | chr12:10780311_10780311  | T -> C   | Validated      |
| SVIL    | 19         | chr10:29779847           | A>C      | not validated  |
| SYNGAP1 | 1          | chr6:33406290_33406290   | T->C     | validated      |
| TAF5L   | 10         | chr1:229738616_229738616 | A -> C   | validated      |
| TMEM111 | 8          | chr3:10018670_10018670   | C to T   | Validated      |
| TNIK    | 10         | chr3:170856013_170856013 | C -> G   | validated      |
| TRAPPC9 | 4          | chr8:141297763_141297763 | A -> T   | validated      |
| TUBB2A  | 7          | chr6:3155074_3155074     | T->C     | false-positive |
| TULP2   | 3          | chr19:49399785_49399785  | T->G     | validated      |
| ZNF512B | 9          | chr20:62594991_62594991  | T->C     | validated      |
| ZNF827  | 2          | chr4:146770579_146770579 | C ->T    | validated      |
| ZNRF4   | 4          | chr19:5456169_5456169    | C ->T    | validated      |
| ZSCAN2  | 5          | chr15:85164460_85164460  | A->G     | validated      |



SI Table 14. Candidate Actionable Targets

| Gene     | Tumor/Sample ID |   |    |   |    |    |    |    |    |   |    |    |    |    |    |    |    |    |    |
|----------|-----------------|---|----|---|----|----|----|----|----|---|----|----|----|----|----|----|----|----|----|
|          | 12              | 7 | 15 | 5 | 42 | 20 | 11 | 13 | 24 | 1 | 12 | 34 | 17 | 25 | 21 | 41 | 43 | 32 | 19 |
| SRC      |                 | X | X  |   |    | X  |    |    |    | X |    |    |    |    | X  |    |    |    |    |
| AURKA    |                 | X | X  |   |    | X  |    |    |    | X |    | X  |    | X  | X  |    |    |    |    |
| MAP2K2   |                 |   |    |   |    |    |    |    |    |   |    | X  | X  | X  |    |    |    |    |    |
| AKT1     |                 | X |    |   | X  | X  |    |    |    |   |    |    |    |    | X  | X  |    |    |    |
| PDGFRB   | X               | X |    |   |    | X  |    |    |    |   |    | X  |    |    |    |    |    |    |    |
| AKT2     |                 |   |    |   |    |    |    |    |    |   |    |    |    |    |    |    |    |    | X  |
| HSP90AA1 |                 | X |    |   |    | X  |    |    |    |   |    |    |    |    | X  |    |    |    |    |
| MTOR     |                 |   |    |   |    |    |    |    |    |   |    |    | X  |    |    |    |    |    | X  |
| PIK3CD   |                 |   |    |   |    |    |    |    |    |   |    |    | X  |    |    |    |    |    | X  |
| MAPK11   |                 |   |    |   |    |    |    |    |    |   |    |    |    |    |    |    |    |    |    |
| MAPK12   |                 |   |    |   |    |    |    |    |    |   |    |    |    |    |    |    |    |    |    |
| PDGFRA   |                 | X |    |   |    | X  |    |    |    |   |    |    |    |    |    |    |    |    |    |
| EGFR     | X               |   |    |   |    |    |    |    |    |   |    |    |    |    | X  |    |    |    |    |
| ERBB2    |                 |   |    |   |    | X  |    |    |    |   |    |    |    |    |    |    |    |    |    |
| FGFR     |                 | X |    |   |    | X  |    |    |    |   |    | X  |    |    |    |    |    |    |    |
| FLT3     |                 |   |    |   |    |    |    |    |    |   |    |    |    |    |    |    |    |    | X  |
| SMAD4    |                 |   | X  | X |    |    | X  | X  | X  |   | X  |    | X  |    |    |    | X  | X  | X  |

| Gene     | Tumor/Sample ID |    |   |   |    |    |    |   |    |    |    |   |    |    |    |    |    | Total |
|----------|-----------------|----|---|---|----|----|----|---|----|----|----|---|----|----|----|----|----|-------|
|          | 47              | 13 | 3 | 6 | 16 | 22 | 37 | 4 | 29 | 45 | 39 | 2 | 14 | 36 | 23 | 18 |    |       |
| SRC      |                 |    |   | X |    | X  |    | X |    |    |    | X | X  |    | X  |    | 11 |       |
| AURKA    |                 |    |   |   |    |    |    | X |    |    |    |   |    |    | X  |    | 9  |       |
| MAP2K2   |                 | X  |   |   | X  | X  |    |   |    | X  |    |   |    |    |    |    | 7  |       |
| AKT1     |                 |    |   |   |    |    |    | X |    |    |    |   | X  |    |    |    | 7  |       |
| PDGFRB   |                 |    |   |   |    | X  |    | X |    |    |    | X |    |    |    |    | 7  |       |
| AKT2     |                 | X  |   |   | X  | X  |    |   |    | X  |    |   |    |    |    |    | 5  |       |
| HSP90AA1 |                 |    |   |   |    |    |    | X |    |    |    |   | X  |    |    |    | 5  |       |
| MTOR     |                 | X  |   |   |    |    |    |   |    | X  |    |   |    |    |    |    | 4  |       |
| PIK3CD   |                 | X  |   |   |    |    |    |   |    | X  |    |   |    |    |    |    | 4  |       |
| MAPK11   |                 | X  |   |   | X  |    |    |   |    | X  |    |   |    |    |    |    | 3  |       |
| MAPK12   |                 | X  |   |   | X  |    |    |   |    | X  |    |   |    |    |    |    | 3  |       |
| PDGFRA   |                 |    |   |   |    |    |    |   |    |    |    |   |    | X  |    |    | 3  |       |
| EGFR     |                 |    |   |   |    |    |    |   |    |    |    |   |    |    |    |    | 2  |       |
| ERBB2    |                 |    |   |   |    |    |    | X |    |    |    |   |    |    |    |    | 2  |       |
| FGFR     |                 |    |   |   |    |    |    |   |    |    |    |   |    |    |    |    | 3  |       |
| FLT3     |                 |    |   |   |    |    |    |   |    |    |    |   |    |    |    |    | 1  |       |
| SMAD4    | X               | X  | X | X | X  | X  | X  |   | X  |    | X  | X |    |    |    | X  | 21 |       |
